# Supplementary material for: Calreticulin exposure correlates with robust adaptive antitumor immunity and favorable prognosis in ovarian carcinoma patients
Source: PubMed Central journal article supplement (PMC6868694; doi:10.1186/s40425-019-0781-z), 2019-11-20
Supplement: 40425_2019_781_MOESM1_ESM.pdf [file 40425_2019_781_MOESM1_ESM.pdf]

## **Supplemental Material**

### **Supplemental Material and Methods**

#### **Library preparation and sequencing**

24 FFPE samples suitable for library preparation according to quality/quantity evaluations were processed following the manufacturer's specifications with minor modifications by using the Illumina TruSeq® RNA Access Library Prep (Illumina) along with purification steps employing SPRI beads. DV200 values for all samples exceeded 40%, and 100 ng of total RNA was used for the cDNA synthesis. Each library was quantified with the fluorimeter Qubit 2.0 (dsDNA HS kit; Thermo Fisher), and the size distribution was determined using a DNA 1000 kit on a 2100 Bioanalyzer instrument prior to pooling. All libraries had a similar size distribution of approximately 260 bp. A 4-plex pool of libraries was made by combining 200 ng of each DNA library. The libraries were sequenced on an Illumina NextSeq 500. At least 180 M pair-end 2x75 bp reads were generated per library. The libraries were prepared and sequenced at EMBL Genomics Core Facility (Heidelberg, Germany).

**NGS data analysis.** The raw FASTQ sequencing files were aligned to human reference genome (build h19) with bowtie2 (version 2.3.2) and tophat2 (version 2.1). Differentially expressed genes (DEGs) between groups were determined using LIMA-R package with default settings. The MCP-counter R package was used to estimate the abundance of tissue-infiltrating immune cell populations.

## Supplemental figures

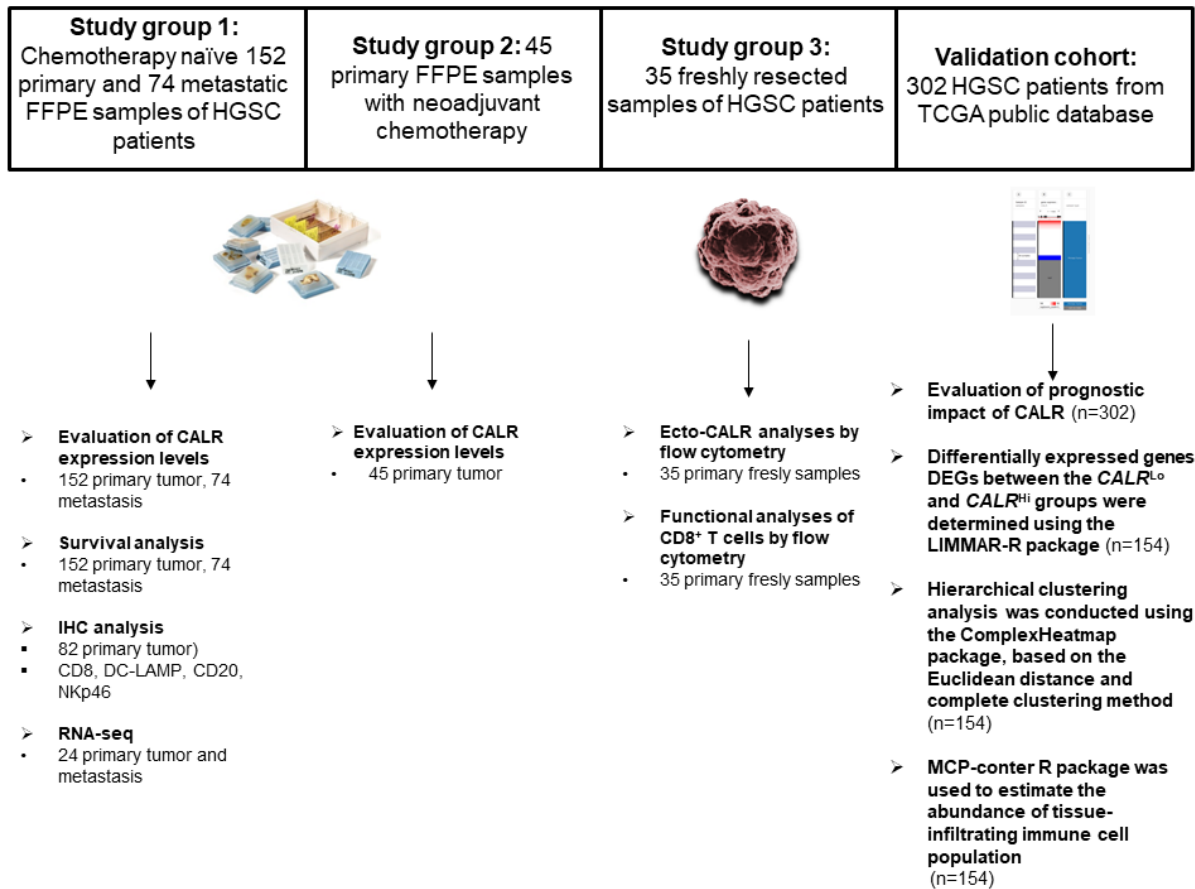

**Suppl. Fig. 1. Experimental design of the study.**

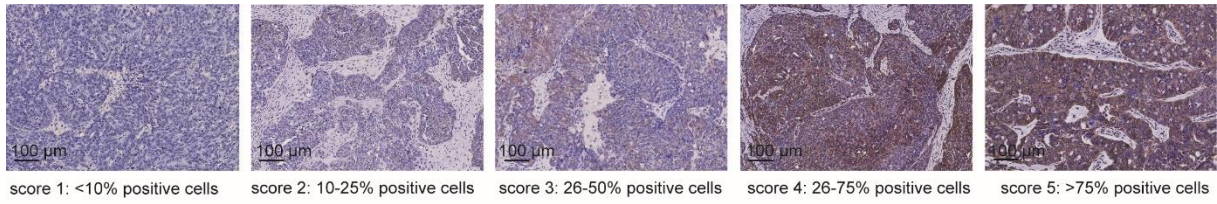

***Suppl. Fig. 2* Representative images of CALR immunostaining. Scale bar = 100 µm.**

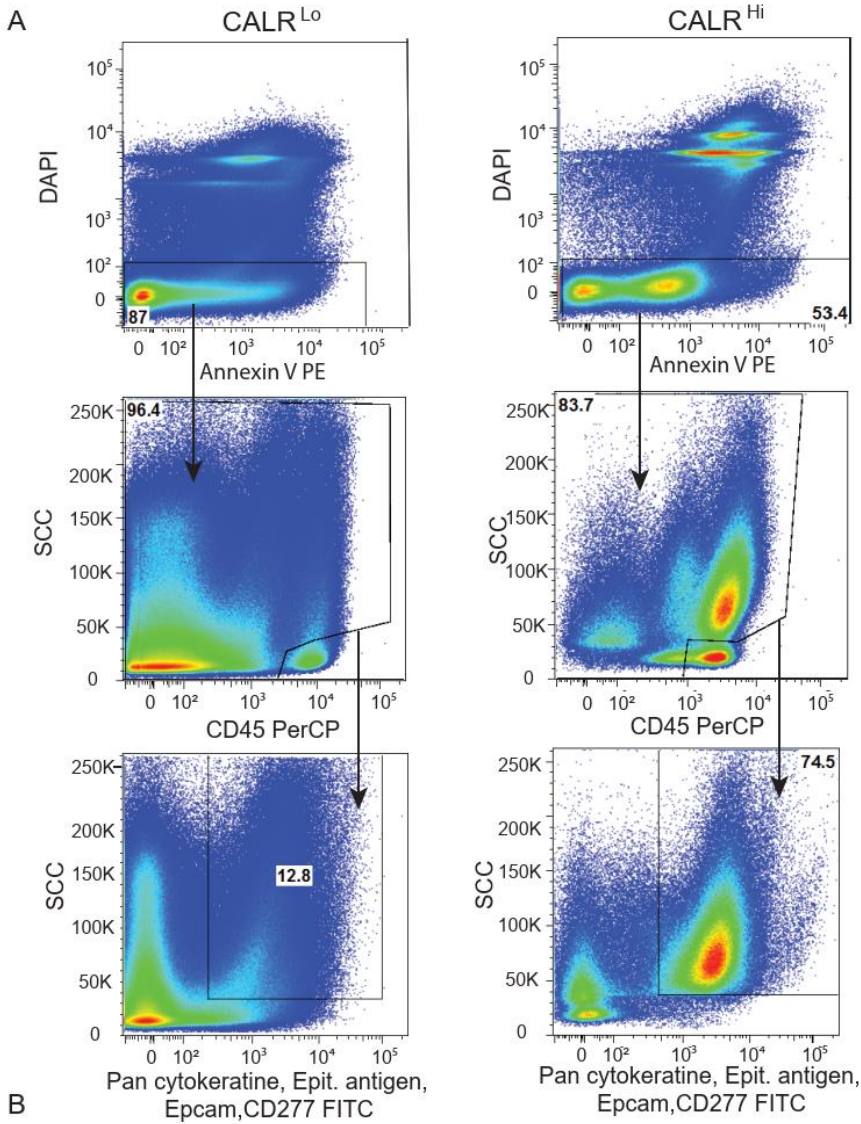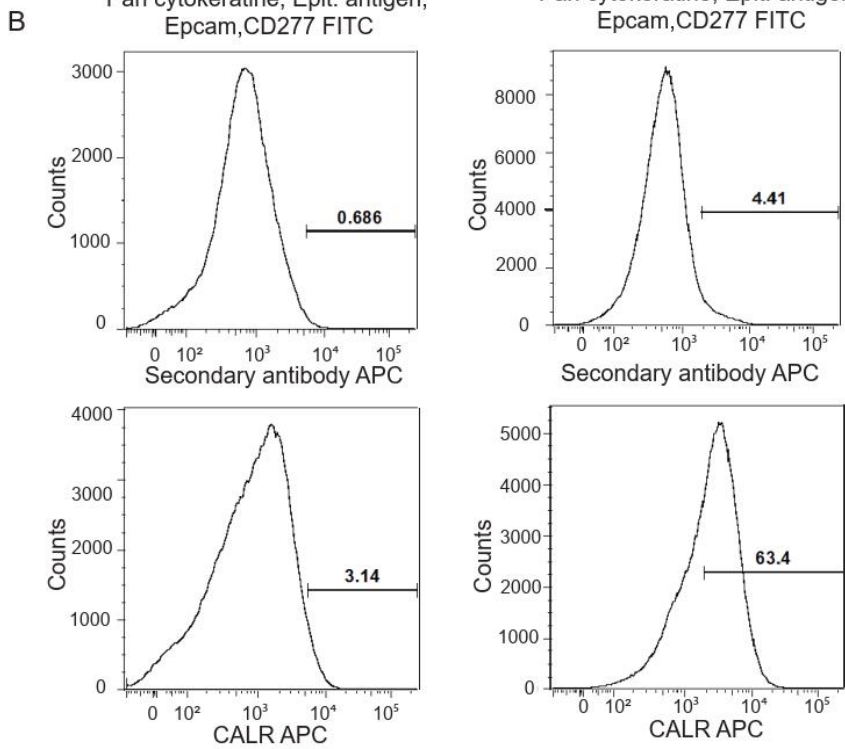

***Suppl. Fig. 3. Flow cytometry-assisted quantification of surface exposed CALR.***

(A) Gating strategy. The percentage of cells in each gate is reported.

(B) Representative staining of surface exposed CALR for representative CALR<sup>Lo</sup> (left) and CALR<sup>Hi</sup> (right) patients.

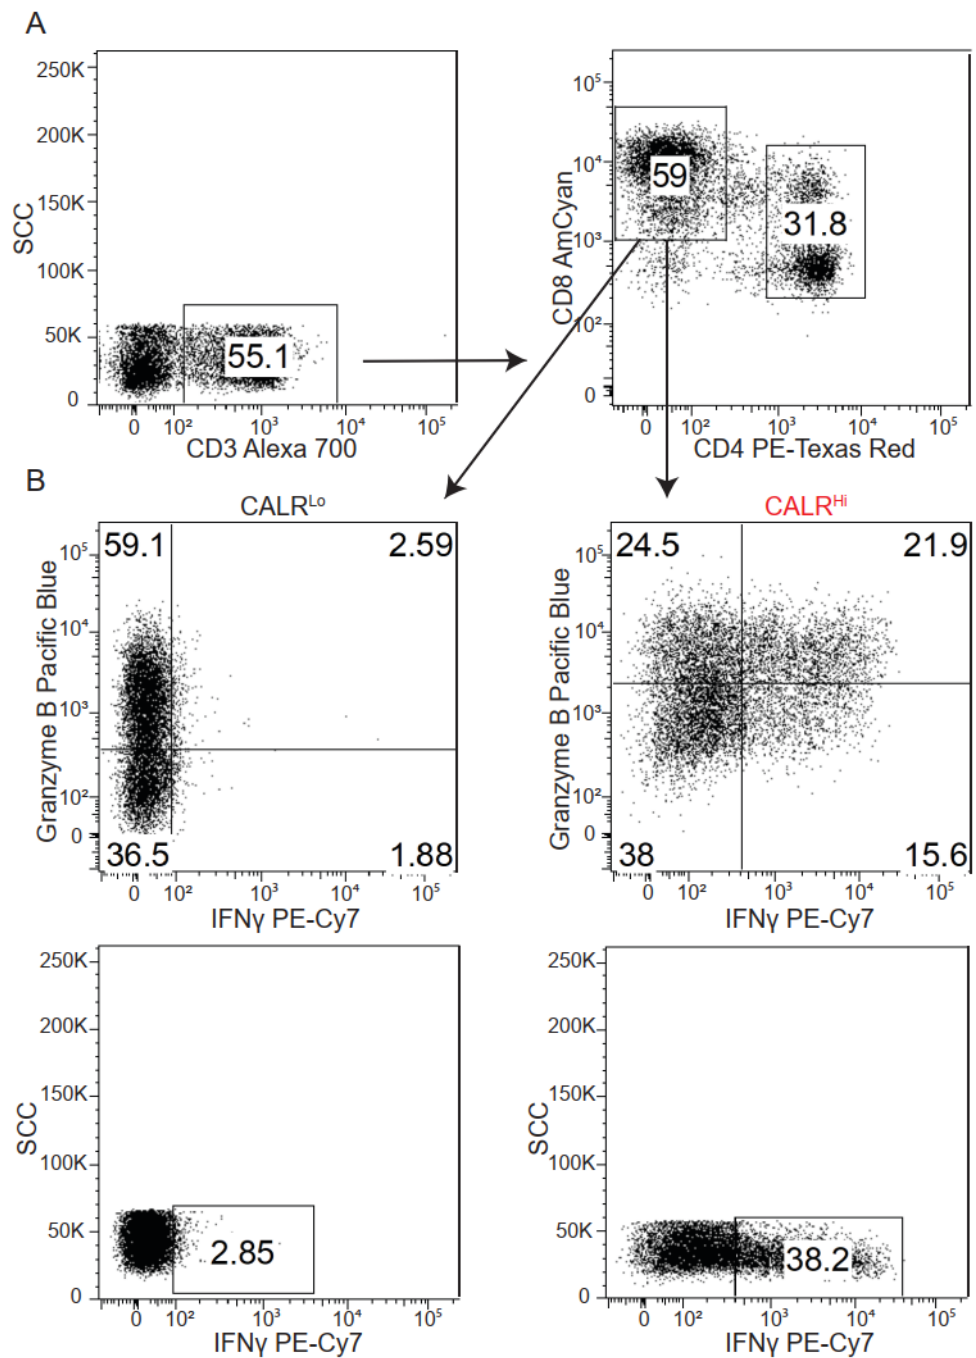

**Suppl. Fig. 4. Degranulation and IFN- $\gamma$  production after *in vitro* stimulation**

**(A)** Gating strategy for CD8<sup>+</sup> T cells. The percentage of cells in each gate is reported.

**(B)** Representative staining of CD8<sup>+</sup> T cells degranulation and IFN- $\gamma$  production after *in vitro* stimulation for representative CALR<sup>Lo</sup> (left) and CALR<sup>Hi</sup> (right) patients.

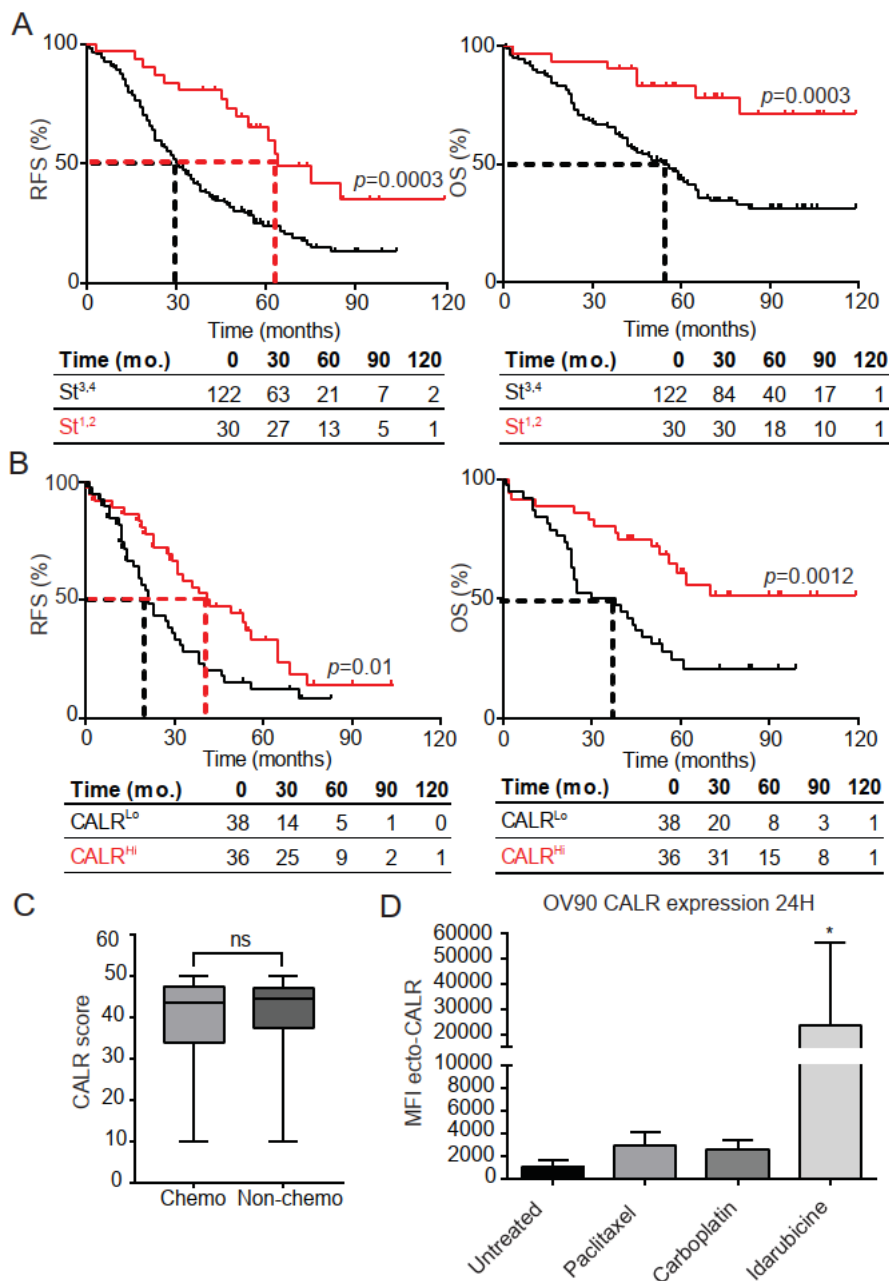

**Suppl. Fig. 5. Prognostic impact of CALR expression in the metastatic TME of HGSC patients and impact of chemotherapy on the final CALR exposure.**

(A) RFS and OS of 152 HGSC patients from Study Group 1 who did not receive neoadjuvant chemotherapy, upon stratification based on disease stage (B) RFS and OS of MT samples from 74 HGSC Study Group 1 patients who did not receive neoadjuvant chemotherapy, upon stratification based on CALR expression. Survival curves were estimated by the Kaplan-Meier

method, and difference between groups were evaluated using log-rank test. Number of patients at risk are reported.

(C) CALR expression levels among 152 chemotherapy-naïve HGSC patients (Study group 1) and 45 HGSC patients receiving neoadjuvant chemotherapy (Study group 2). Box plots: lower quartile, median, upper quartile; whiskers, minimum, maximum.

(D) CALR exposure on OV90 cells left untreated or exposed to 70  $\mu$ M paclitaxel, 5 mM carboplatin and 20  $\mu$ M idarubicin for 24 hours. Mean  $\pm$  SEM (n = 5); \* $p$ <0.05 as compared to untreated cells.



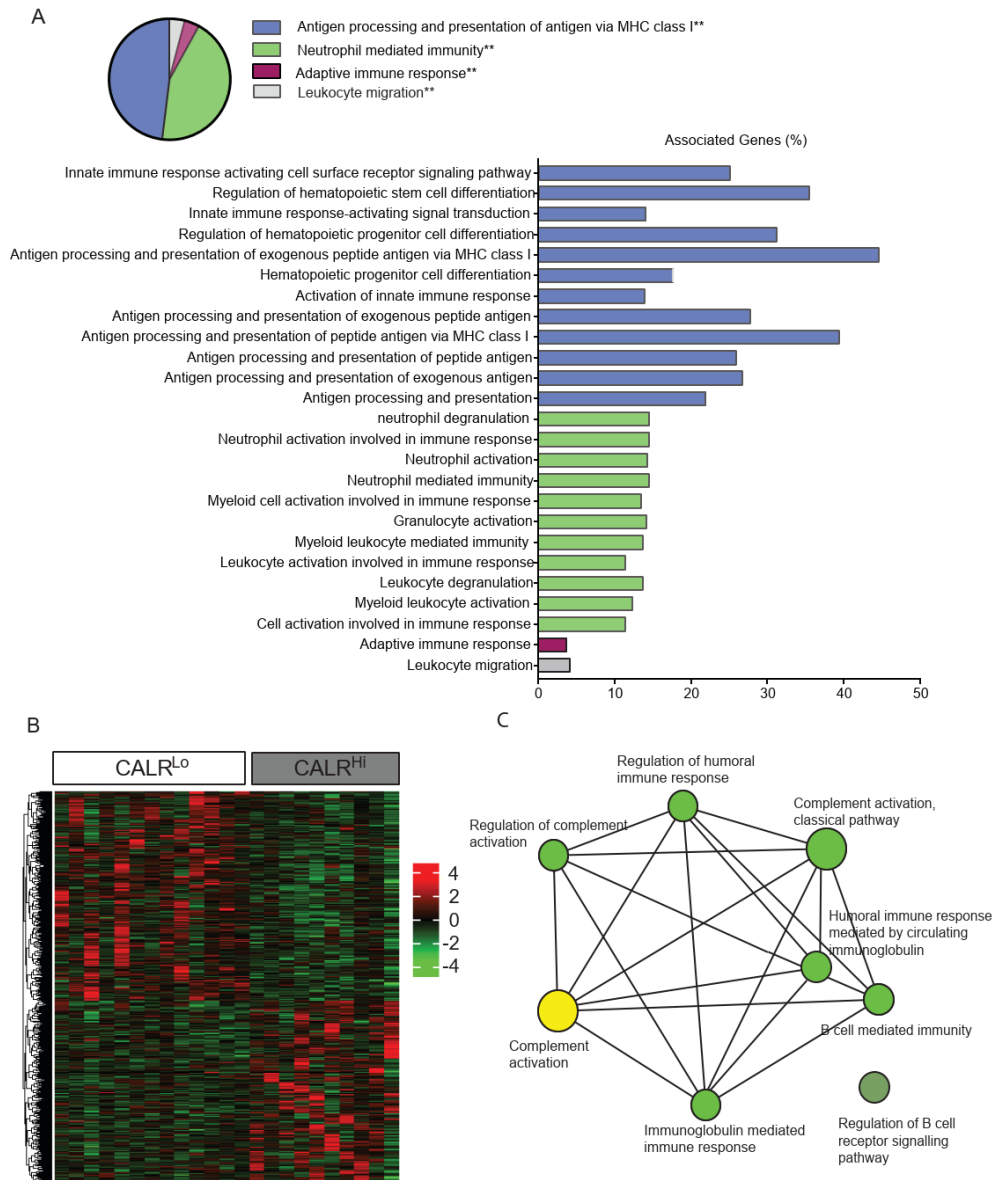

**Suppl. Fig. 6. Transcriptional signatures of the tumor microenvironment of  $CALR^{Hi}$  versus  $CALR^{Lo}$  PT and MT samples of HGSCs patients.**

**(A)** ClueGo analyses of significantly upregulated genes in 77  $CALR^{Hi}$  versus 77  $CALR^{Lo}$  HGSC patients from the TCGA public database (302 patients were divided into 4 groups using quartile stratification, only lower (no=77) and upper (no=77) quartile is presented).

**(B)** Hierarchical clustering and **(C)** ClueGo analyses of genes significantly upregulated and downregulated in MT samples of 11  $CALR^{Hi}$  versus 13  $CALR^{Lo}$  HGSC patients.

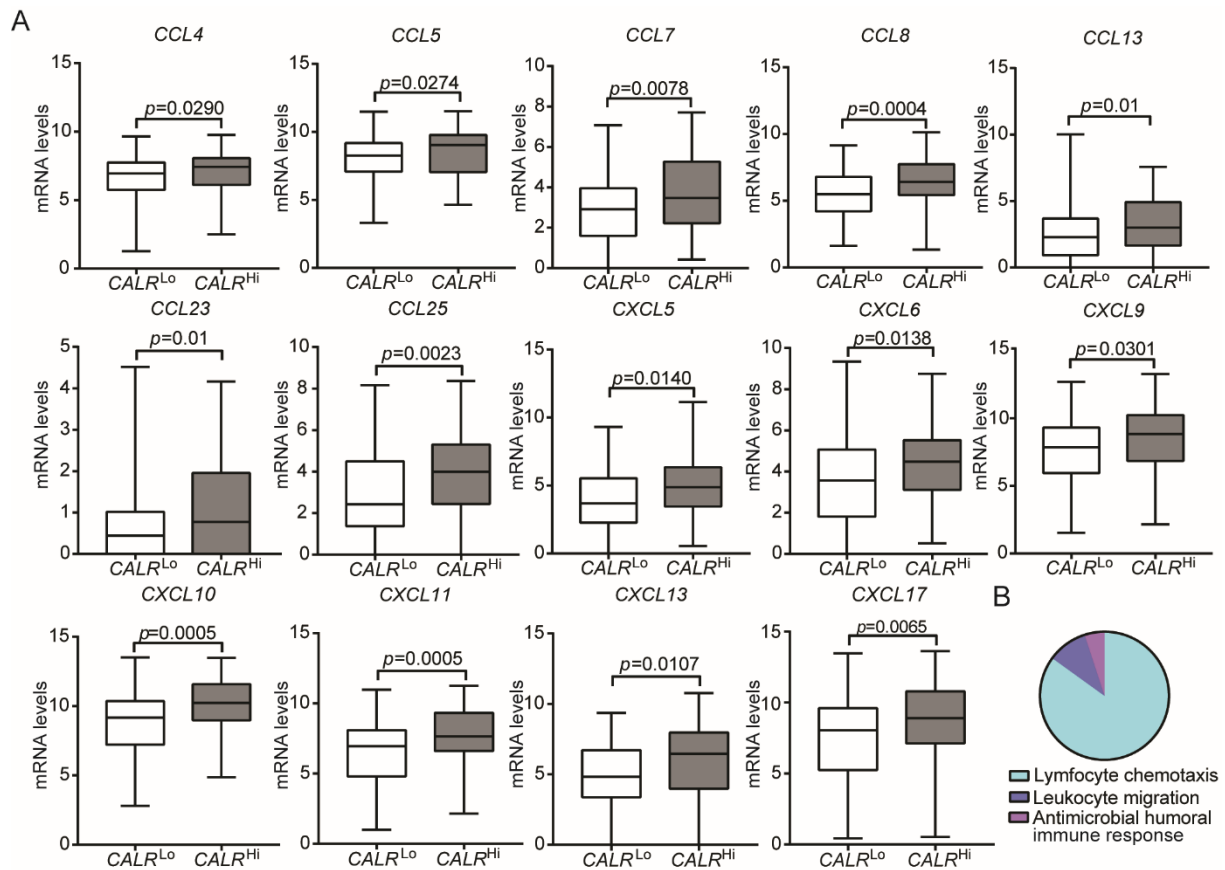

**Suppl. Fig. 7. Chemokine signatures of the tumor microenvironment of  $CALR^{Hi}$  versus  $CALR^{Lo}$  of HGSCs patients.**

(A) Relative expression levels of *CCL4*, *CCL5*, *CCL7*, *CCL8*, *CCL13*, *CCL23*, *CCL25*, *CXCL5*, *CXCL6*, *CXCL9*, *CXCL10*, *CXCL11*, *CXCL13* and *CXCL17* in 77  $CALR^{Hi}$  versus 77  $CALR^{Lo}$  PT samples from HGSC TCGA patients and (B) ClueGo analyses of respective genes (302 patients were divided into 4 groups using quartile stratification, only lower (no=77) and upper (no=77) quartile is presented).

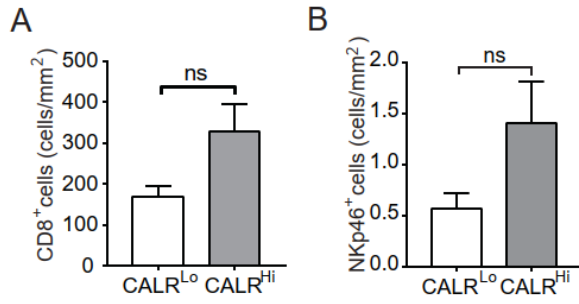

**Suppl. Fig. 8. Impact of CALR on the frequency of  $CD8^+$  T cells and  $NKp46^+$  NK cells in MT samples of HGSC patients.**

Density of  $CD8^+$  T cells (A) and  $NKp46^+$  cells (B) in MT samples of  $CALR^{Lo}$  versus  $CALR^{Hi}$  HGSC patients (n=74) (Study group 1). Box plots: lower quartile, median, upper quartile; whiskers, minimum, maximum.

## Supplemental tables

**Supplemental Table 1. Main clinical and biological characteristics of 45 HGSC patients after neo-adjuvant chemotherapy treatment (study group 2) (University Hospital Hradec Kralove)**

| <b>Variable</b>                 | <b>study group 2<br/>(n=45)</b> |
|---------------------------------|---------------------------------|
| <b>Age:</b>                     |                                 |
| Mean age (y) ± SEM              | 65 ± 1.4                        |
| Range                           | 33-82                           |
| <b>pTNM stage:</b>              |                                 |
| Stage I                         | 3 (6.7%)                        |
| Stage II                        | 0 (0%)                          |
| Stage III and IV                | 42 (93.3%)                      |
| <b>Debulking</b>                |                                 |
| R0                              | 22 (48.8%)                      |
| R1                              | 3 (6.6%)                        |
| R2                              | 20 (44.6%)                      |
| <b>Type of chemotherapy</b>     |                                 |
| CBDCA+PTX                       | 41 (91.1%)                      |
| others                          | 4 (8.9%)                        |
| <b>Vital status of patients</b> | 7 (14,6%)                       |

**Supplemental Table 2: Main clinical and biological characteristics of 35 HGSC patients without neo-adjuvant chemotherapy treatment prospectively collected (study group 3) (University Hospital Motol).**

| Variable           | Study group 3<br>(n=35) |
|--------------------|-------------------------|
| <b>Age:</b>        |                         |
| Mean age (y) ± SEM | 61 ± 2.484              |
| Range              | 44-80                   |
| <b>pTNM stage:</b> |                         |
| Stage I            | 1 (2.9%)                |
| Stage II           | 6 (17.1%)               |
| Stage III          | 28 (80%)                |
| <b>Debulking</b>   |                         |
| R0                 | 17 (48.5%)              |
| R1                 | 7 (20%)                 |
| R2                 | 11 (31,5%)              |

**Supplemental Table 3: The list of antibodies use for IHC staining.**

| Parameter       | Source | Producer          | Clone     | Detection system                                                        | Revelation                                            | Dilution | Incubation time [min] |
|-----------------|--------|-------------------|-----------|-------------------------------------------------------------------------|-------------------------------------------------------|----------|-----------------------|
| <b>CD20*</b>    | mouse  | Dako              | L26       | ImmPRESS-AP anti-mouse IgG (alkaline phosphatase) Polymer Detection Kit | ImmPACT Vector red Alkaline Phosphatase substrate kit | 1:250    | 60                    |
| <b>CD8</b>      | rabbit | Spring Bioscience | SP16      | EnVision™+/HRP, Rabbit                                                  | DAB+ substrate Chromogen system                       | 1:80     | 30                    |
| <b>DC-LAMP*</b> | rat    | Dendritics        | 1010E1.01 | donkey anti-rat IgG-biot (Jackson ImmunoResearch)                       | DAB+ substrate Chromogen system                       | 1:80     | 60                    |
| <b>NKp46</b>    | mouse  | RD systems        | 195314    | Impress HRP anti-mouse IgG (Peroxidase) Polymer Detection kit           | DAB+ substrate Chromogen system                       | 1:100    | 90                    |
| <b>CALR</b>     | mouse  | Abcam             | FMC75     | donkey anti-mouse IgG-biot (Jackson ImmunoResearch)                     | DAB+ substrate Chromogen system                       | 1:200    | 120                   |

**\*CD20 and DC-LAMP were stained in double staining protokol**

**Supplemental Table 4. The list of antibodies used for flow cytometry.**

| <b>Assay</b>             | <b>Parameter</b>         | <b>Source</b> | <b>Producer</b>          | <b>Clone</b> | <b>Fluorochrome</b> | <b>Dilution</b> |
|--------------------------|--------------------------|---------------|--------------------------|--------------|---------------------|-----------------|
| <b>Exposure of CALR</b>  | <b>Calreticulin</b>      | mouse         | Enzo Life Sciences, Inc. | FMC 75       | -                   | 2.4:100         |
|                          | <b>CD227</b>             | mouse         | BD Biosciences           | HMPV         | FITC                | 2:100           |
|                          | <b>Epitelial antigen</b> | mouse         | DAKO                     | Ber-EP4      | FITC                | 2:100           |
|                          | <b>Epcam</b>             | mouse         | BioLegend                | 9C4          | FITC                | 2:100           |
|                          | <b>Pan cytokeratin</b>   | murine        | eBioscience              | AE1/AE3      | A488                | 2:100           |
|                          | <b>CD45</b>              | mouse         | EXBIO                    | MEM-28       | PerCP               | 6:100           |
| <b>Stimulation assay</b> | <b>CD3</b>               | mouse         | EXBIO                    | MEM-57       | Alexa 700           | 5:100           |
|                          | <b>CD4</b>               | mouse         | Beckman Coulter          | SFC112T4D11  | ECD                 | 5:100           |
|                          | <b>CD8</b>               | mouse         | BD Biosciences           | RPA-T8       | HV500               | 5:100           |
|                          | <b>Granzyme</b>          | mouse         | BD Biosciences           | GB11         | BV421               | 4:100           |
|                          | <b>IFNg</b>              | murine        | eBioscience              | 4S.B3        | PE-Cy7              | 1:100           |





**Supplemental Table 6. List of genes significantly overrepresented in *CALR<sup>Hi</sup>* versus *CALR<sup>Lo</sup>* HGSC samples from TCGA public database.**

| Gene symbol  | Base mean    | log2(FC)     | StdErr      | Wald-Stats   | P-value  | P-adj    |
|--------------|--------------|--------------|-------------|--------------|----------|----------|
| MUC5B        | -0.916925721 | -1.184547727 | 7.725090422 | -3.363400091 | 8.67E-04 | 1.18E-02 |
| TMEM100      | -2.453900898 | -0.846440909 | 6.391571104 | -2.835727139 | 4.88E-03 | 3.88E-02 |
| KCNJ4        | 0.52803596   | -0.830827597 | 2.861216721 | -3.797335501 | 1.76E-04 | 3.93E-03 |
| LOC648740    | 4.510801398  | -0.828086039 | 3.091973214 | -4.811220771 | 2.36E-06 | 2.05E-04 |
| FAM135B      | -1.402105572 | -0.817215584 | 3.415451948 | -3.205633858 | 1.49E-03 | 1.73E-02 |
| CSMD2        | -0.458468524 | -0.814016234 | 5.396208117 | -3.506417793 | 5.22E-04 | 8.36E-03 |
| KCNQ5        | -2.523058163 | -0.78387987  | 4.197041883 | -2.80980099  | 5.28E-03 | 4.12E-02 |
| LOC283174    | -1.193999777 | -0.768810065 | 4.961617045 | -3.274169592 | 1.18E-03 | 1.45E-02 |
| AMY2B        | 2.805255338  | -0.766977922 | 6.182608442 | -4.402337171 | 1.48E-05 | 7.23E-04 |
| ZFPM2        | 3.039215194  | -0.763869156 | 7.523738799 | -4.460348512 | 1.15E-05 | 6.10E-04 |
| SLC9A3       | 2.766369192  | -0.752196429 | 2.834474513 | -4.392630165 | 1.54E-05 | 7.44E-04 |
| C9orf45      | 8.00396042   | -0.732597403 | 6.93995974  | -5.568194282 | 5.62E-08 | 1.57E-05 |
| NTNG1        | -2.724220719 | -0.724520455 | 4.414437175 | -2.733063028 | 6.64E-03 | 4.80E-02 |
| EPPK1        | 2.975981811  | -0.723984416 | 10.36706104 | -4.444734904 | 1.23E-05 | 6.36E-04 |
| KIRREL3      | -2.203563102 | -0.714372727 | 3.47347013  | -2.927756797 | 3.67E-03 | 3.21E-02 |
| GOLGA8B      | 1.644510577  | -0.71087987  | 8.218295779 | -4.10391617  | 5.21E-05 | 1.65E-03 |
| C12orf53     | -2.666839808 | -0.707371429 | 5.771088961 | -2.755159164 | 6.22E-03 | 4.60E-02 |
| CDH4         | -0.729037861 | -0.705938312 | 1.763449026 | -3.422680013 | 7.04E-04 | 1.02E-02 |
| CCND2        | -0.227916871 | -0.696417857 | 9.406448864 | -3.576344199 | 4.05E-04 | 7.00E-03 |
| LOC100272216 | 2.641191855  | -0.695275325 | 3.556484416 | -4.361253873 | 1.77E-05 | 8.26E-04 |
| FCGBP        | -0.542121053 | -0.694297403 | 9.647622078 | -3.480726803 | 5.72E-04 | 8.94E-03 |
| KIAA1644     | -1.466814679 | -0.684629221 | 4.926795779 | -3.184043007 | 1.60E-03 | 1.80E-02 |
| PAK3         | -0.537874896 | -0.678852273 | 2.319399838 | -3.482035069 | 5.70E-04 | 8.92E-03 |
| CYP2D7P1     | 4.811525569  | -0.674593182 | 3.241854058 | -4.880240517 | 1.71E-06 | 1.68E-04 |
| ARHGAP20     | 0.660230054  | -0.667985065 | 5.987136039 | -3.834787194 | 1.52E-04 | 3.57E-03 |
| LOC148696    | 4.885647149  | -0.667625974 | 2.371407143 | -4.89712485  | 1.57E-06 | 1.58E-04 |
| ZMAT1        | 2.07602386   | -0.663570779 | 6.356092532 | -4.217038776 | 3.26E-05 | 1.23E-03 |
| FLJ42627     | 6.756809559  | -0.658847403 | 5.747931494 | -5.308264138 | 2.13E-07 | 4.01E-05 |
| LOC339535    | -2.27640824  | -0.657570455 | 7.896224513 | -2.901262091 | 3.99E-03 | 3.40E-02 |
| MGAT3        | 1.49052307   | -0.654521429 | 9.055044481 | -4.062869462 | 6.16E-05 | 1.85E-03 |
| DRD2         | -1.940140334 | -0.637869156 | 4.776824513 | -3.021736563 | 2.72E-03 | 2.61E-02 |
| SATB1        | 2.02964828   | -0.635819805 | 8.067835552 | -4.205011106 | 3.43E-05 | 1.27E-03 |
| PRKCA        | 6.203566732  | -0.633904221 | 8.994610877 | -5.189546422 | 3.84E-07 | 5.91E-05 |
| C9orf131     | 3.20833456   | -0.63348474  | 3.053971916 | -4.501874845 | 9.57E-06 | 5.37E-04 |
| STRC         | -0.641921229 | -0.632463636 | 4.099272727 | -3.44984612  | 6.39E-04 | 9.57E-03 |
| SSPO         | -1.859027273 | -0.628676623 | 5.432098052 | -3.050125514 | 2.49E-03 | 2.45E-02 |
| PNPLA7       | 1.686432673  | -0.62417987  | 6.21723539  | -4.11502752  | 4.98E-05 | 1.61E-03 |
| LOC400931    | 2.956925262  | -0.620796104 | 6.512424026 | -4.440020039 | 1.26E-05 | 6.43E-04 |
| POLN         | 3.287385388  | -0.613240584 | 4.233664123 | -4.521171155 | 8.79E-06 | 5.11E-04 |

|               |              |              |             |              |          |          |
|---------------|--------------|--------------|-------------|--------------|----------|----------|
| PLCH2         | -2.411817223 | -0.593655519 | 4.810624188 | -2.85139442  | 4.65E-03 | 3.76E-02 |
| XIST          | -2.709507123 | -0.592982468 | 10.82516006 | -2.738745067 | 6.53E-03 | 4.75E-02 |
| RUNDC2C       | 2.919846119  | -0.592636364 | 3.892399351 | -4.430833542 | 1.31E-05 | 6.60E-04 |
| LONRF2        | -1.364987251 | -0.59241461  | 9.141665422 | -3.217957731 | 1.43E-03 | 1.68E-02 |
| CAPN3         | 1.226931363  | -0.591836688 | 5.690640097 | -3.991731538 | 8.21E-05 | 2.27E-03 |
| BTBD19        | 0.837622334  | -0.590401299 | 5.05302013  | -3.884529731 | 1.26E-04 | 3.08E-03 |
| FMN2          | -1.867642563 | -0.590068182 | 2.880453571 | -3.047122026 | 2.51E-03 | 2.47E-02 |
| LOC646851     | 4.289947685  | -0.58950974  | 6.649108766 | -4.759988521 | 2.99E-06 | 2.45E-04 |
| LRR4C         | -2.279103698 | -0.587370455 | 5.40336737  | -2.900277333 | 4.00E-03 | 3.40E-02 |
| MYO15B        | 1.637930102  | -0.586969481 | 9.080215909 | -4.102169593 | 5.25E-05 | 1.65E-03 |
| RFX2          | 2.557039045  | -0.586172403 | 7.494578084 | -4.340048555 | 1.94E-05 | 8.76E-04 |
| STON1-GTF2A1L | 0.8278097    | -0.583101623 | 0.69242711  | -3.881793233 | 1.27E-04 | 3.10E-03 |
| KCND3         | -2.603518767 | -0.580956818 | 3.587915097 | -2.779348923 | 5.78E-03 | 4.36E-02 |
| WDR52         | 2.43813754   | -0.580258117 | 6.611594968 | -4.309930567 | 2.20E-05 | 9.33E-04 |
| CG030         | 4.794297452  | -0.579816234 | 4.582452922 | -4.87630896  | 1.74E-06 | 1.69E-04 |
| ZFH4          | -2.359653865 | -0.578788312 | 6.09782013  | -2.87070187  | 4.38E-03 | 3.62E-02 |
| FLJ13197      | 2.862166939  | -0.577136039 | 5.164538474 | -4.416510058 | 1.39E-05 | 6.93E-04 |
| MYH3          | 0.103047341  | -0.576362987 | 4.044752273 | -3.674589116 | 2.81E-04 | 5.52E-03 |
| LOC100190986  | 6.802557002  | -0.574910714 | 7.767853084 | -5.317982471 | 2.02E-07 | 3.88E-05 |
| LOC221442     | -1.175390781 | -0.573303247 | 4.418719156 | -3.280233134 | 1.16E-03 | 1.43E-02 |
| CROCCL2       | 5.542859213  | -0.571719481 | 5.858358442 | -5.044731423 | 7.78E-07 | 9.40E-05 |
| B3GALT2       | 2.005006627  | -0.56985487  | 3.403395292 | -4.198607772 | 3.52E-05 | 1.29E-03 |
| PRICKLE1      | -0.197408036 | -0.566693506 | 8.208207143 | -3.585503662 | 3.91E-04 | 6.85E-03 |
| RUNX1T1       | -2.647287931 | -0.563312662 | 4.274940422 | -2.762649793 | 6.08E-03 | 4.53E-02 |
| GOLGA6L5      | 2.174279546  | -0.561692532 | 4.126216721 | -4.242421805 | 2.93E-05 | 1.15E-03 |
| CRIPAK        | 6.085875538  | -0.561162987 | 7.214400325 | -5.163999555 | 4.35E-07 | 6.38E-05 |
| NPIP          | -1.165655934 | -0.557741883 | 7.217245942 | -3.283400981 | 1.14E-03 | 1.42E-02 |
| TAS2R4        | 4.794687177  | -0.557138312 | 1.67795487  | -4.876397928 | 1.74E-06 | 1.69E-04 |
| SPTBN5        | -0.824065558 | -0.554888636 | 5.473932955 | -3.392817898 | 7.82E-04 | 1.10E-02 |
| C15orf52      | 1.300211657  | -0.554750974 | 7.954045292 | -4.011621835 | 7.58E-05 | 2.16E-03 |
| LOC641298     | 2.278069603  | -0.554333442 | 6.928829383 | -4.269089329 | 2.62E-05 | 1.07E-03 |
| SFMBT2        | -0.472501401 | -0.553848052 | 4.856250649 | -3.502120195 | 5.30E-04 | 8.46E-03 |
| MAPK15        | -0.909998058 | -0.550743831 | 8.80962224  | -3.365602971 | 8.61E-04 | 1.18E-02 |
| CHAD          | -0.455091014 | -0.550698052 | 3.870500974 | -3.507451439 | 5.20E-04 | 8.36E-03 |
| KCNT2         | -2.621554616 | -0.548853247 | 4.527118831 | -2.772479324 | 5.90E-03 | 4.43E-02 |
| SYT6          | 1.001867941  | -0.548482792 | 2.518676136 | -3.930078265 | 1.05E-04 | 2.72E-03 |
| LOC92973      | 1.412069621  | -0.548459091 | 5.021338636 | -4.041813796 | 6.71E-05 | 1.97E-03 |
| SEC31B        | 0.171691949  | -0.546916883 | 6.014824026 | -3.694666574 | 2.61E-04 | 5.19E-03 |
| LOC100132247  | 6.946678643  | -0.546132792 | 9.319731656 | -5.348503565 | 1.74E-07 | 3.49E-05 |
| NBEA          | -1.788667585 | -0.544421429 | 5.582341234 | -3.074551357 | 2.30E-03 | 2.32E-02 |
| RPL23AP53     | 9.297277279  | -0.543428247 | 6.138217045 | -5.827748315 | 1.42E-08 | 5.13E-06 |
| CEACAM19      | 0.372871742  | -0.542902922 | 6.327054383 | -3.752944028 | 2.09E-04 | 4.43E-03 |
| SGK223        | 6.514751252  | -0.539402597 | 9.13608961  | -5.256595681 | 2.75E-07 | 4.69E-05 |
| PLEKHH2       | -0.060127912 | -0.538507143 | 6.827070455 | -3.626455846 | 3.36E-04 | 6.21E-03 |
| ZNF154        | 5.164075809  | -0.537621429 | 5.090578896 | -4.960112168 | 1.17E-06 | 1.28E-04 |

|              |              |              |             |              |          |          |
|--------------|--------------|--------------|-------------|--------------|----------|----------|
| TXK          | -1.184654061 | -0.537303896 | 5.204924026 | -3.277216098 | 1.17E-03 | 1.44E-02 |
| SYT12        | -2.194073823 | -0.536354221 | 7.308411851 | -2.93119152  | 3.63E-03 | 3.18E-02 |
| MASP2        | 2.637277644  | -0.534891234 | 4.367335552 | -4.360269559 | 1.77E-05 | 8.28E-04 |
| C1QTNF7      | -1.933660202 | -0.533361688 | 5.389399026 | -3.024013765 | 2.70E-03 | 2.60E-02 |
| ZBTB20       | 6.501425436  | -0.532543506 | 6.160160065 | -5.253739012 | 2.79E-07 | 4.69E-05 |
| NTN5         | -1.608337919 | -0.531237338 | 3.988291721 | -3.1363388   | 1.88E-03 | 2.00E-02 |
| SGSM2        | 13.72313581  | -0.531057143 | 9.739434416 | -6.65501865  | 1.30E-10 | 1.03E-07 |
| LOC90834     | 2.621871636  | -0.528640584 | 3.61165763  | -4.356393482 | 1.80E-05 | 8.35E-04 |
| RPL21P44     | 4.611570846  | -0.52707987  | 2.390080195 | -4.834442183 | 2.11E-06 | 1.89E-04 |
| KSR2         | -0.360478579 | -0.524266234 | 6.591367532 | -3.536293431 | 4.68E-04 | 7.77E-03 |
| PCLO         | -2.186420508 | -0.522714286 | 6.52689026  | -2.933958936 | 3.60E-03 | 3.17E-02 |
| ATP8A1       | 2.348160125  | -0.522459091 | 7.242363312 | -4.287015168 | 2.43E-05 | 1.00E-03 |
| MGC16384     | 4.287926921  | -0.520985065 | 2.785467208 | -4.759517577 | 2.99E-06 | 2.45E-04 |
| PLEC         | 3.185592162  | -0.520288636 | 13.9020336  | -4.496310058 | 9.81E-06 | 5.45E-04 |
| MYO5C        | 7.206874331  | -0.520146429 | 9.453514448 | -5.403246157 | 1.31E-07 | 2.90E-05 |
| KCNIP4       | -0.752258004 | -0.518113636 | 4.923599026 | -3.415405455 | 7.23E-04 | 1.04E-02 |
| SYNE2        | 8.017287957  | -0.517678896 | 10.56488653 | -5.570918437 | 5.54E-08 | 1.57E-05 |
| LOC100129034 | 9.710177329  | -0.515015584 | 10.64364675 | -5.908688816 | 9.15E-09 | 3.54E-06 |
| DOK6         | -0.303584337 | -0.514842857 | 4.088526623 | -3.553533616 | 4.40E-04 | 7.46E-03 |
| RASSF8       | -1.567143261 | -0.514323701 | 8.249686851 | -3.150294246 | 1.79E-03 | 1.94E-02 |
| FLRT2        | -2.25639566  | -0.510082468 | 7.525293182 | -2.908563629 | 3.90E-03 | 3.34E-02 |
| ZNF469       | -1.994479498 | -0.509838312 | 8.559799675 | -3.002577177 | 2.90E-03 | 2.72E-02 |
| LOC100272228 | 0.043385125  | -0.509442532 | 5.536327435 | -3.657057168 | 3.00E-04 | 5.73E-03 |
| AMT          | -1.612287531 | -0.508429545 | 6.802194968 | -3.134997743 | 1.88E-03 | 2.01E-02 |
| C3orf65      | -0.730282418 | -0.508322078 | 2.594095455 | -3.422290472 | 7.05E-04 | 1.02E-02 |
| KLRA1        | 2.187434705  | -0.506964286 | 4.917356818 | -4.245810055 | 2.89E-05 | 1.14E-03 |
| AKAP12       | -1.651339927 | -0.505997403 | 9.898322727 | -3.121708817 | 1.97E-03 | 2.07E-02 |
| JRK          | 7.149816044  | -0.505613636 | 8.970044481 | -5.391280763 | 1.40E-07 | 3.02E-05 |
| FLJ45340     | 5.193238365  | -0.504760065 | 9.741621916 | -4.966670247 | 1.13E-06 | 1.26E-04 |
| GOLGA6L10    | 3.22341606   | -0.504507143 | 6.537855519 | -4.505561798 | 9.42E-06 | 5.34E-04 |
| EMR4P        | -1.16272976  | -0.503472078 | 1.766786039 | -3.284352641 | 1.14E-03 | 1.42E-02 |
| SERTAD4      | -2.316747937 | -0.503198701 | 6.306990909 | -2.886491224 | 4.17E-03 | 3.51E-02 |
| FLJ10661     | 0.616108356  | -0.500871104 | 4.411039123 | -3.822324127 | 1.60E-04 | 3.68E-03 |
| AGBL2        | -1.756657952 | -0.500647727 | 4.636685877 | -3.085603647 | 2.22E-03 | 2.25E-02 |
| CX3CR1       | -2.441031623 | -0.500600649 | 7.430547727 | -2.840526912 | 4.80E-03 | 3.85E-02 |
| C9orf117     | -1.714721918 | -0.496819805 | 5.564375812 | -3.100027393 | 2.11E-03 | 2.18E-02 |
| GALNTL2      | -1.843708715 | -0.496090584 | 4.868759253 | -3.055459065 | 2.44E-03 | 2.43E-02 |
| GOLGA2B      | 0.940542512  | -0.495951948 | 7.107287013 | -3.913127466 | 1.12E-04 | 2.86E-03 |
| CATSPER2     | 1.075638785  | -0.495552597 | 4.774947078 | -3.950382205 | 9.68E-05 | 2.56E-03 |
| PRRT2        | -0.756905827 | -0.492958442 | 6.178415584 | -3.413947633 | 7.26E-04 | 1.05E-02 |
| NR2F1        | -1.345107909 | -0.492395455 | 7.842262013 | -3.224539922 | 1.40E-03 | 1.65E-02 |
| SBF1P1       | -0.178482401 | -0.491639935 | 1.648871591 | -3.591174811 | 3.83E-04 | 6.75E-03 |
| CUBN         | -0.806931597 | -0.491116234 | 4.690952273 | -3.398220115 | 7.68E-04 | 1.09E-02 |
| RYR3         | -1.773617426 | -0.490433766 | 3.61798961  | -3.079752512 | 2.26E-03 | 2.29E-02 |
| SPINLW1      | -2.557161061 | -0.489570455 | 3.027392695 | -2.796932413 | 5.48E-03 | 4.23E-02 |

|            |              |              |             |              |          |          |
|------------|--------------|--------------|-------------|--------------|----------|----------|
| CHRNA6     | -2.240756446 | -0.488190584 | 2.609485227 | -2.914257525 | 3.83E-03 | 3.30E-02 |
| NLRP1      | -0.821713164 | -0.487520779 | 6.515767532 | -3.393560063 | 7.80E-04 | 1.10E-02 |
| TSSK4      | 3.411386991  | -0.485670455 | 3.976828409 | -4.551296344 | 7.69E-06 | 4.67E-04 |
| ALMS1P     | 0.766748071  | -0.485253247 | 1.977022727 | -3.864725341 | 1.36E-04 | 3.25E-03 |
| PRINS      | 1.864887444  | -0.482242532 | 5.567615097 | -4.162030442 | 4.10E-05 | 1.45E-03 |
| LOC619207  | -2.360306247 | -0.481521429 | 4.607451623 | -2.87046116  | 4.38E-03 | 3.62E-02 |
| TSHZ2      | -1.338790063 | -0.481018506 | 8.160901136 | -3.226629184 | 1.39E-03 | 1.64E-02 |
| CLN8       | 8.303235862  | -0.480501623 | 7.60614789  | -5.62910916  | 4.09E-08 | 1.23E-05 |
| NPIPL3     | 3.913124247  | -0.480014286 | 10.09466429 | -4.671464477 | 4.48E-06 | 3.24E-04 |
| FAM22F     | 3.051761202  | -0.479765584 | 2.335070455 | -4.463440698 | 1.13E-05 | 6.05E-04 |
| PKD1       | 6.300916343  | -0.478832143 | 10.44904562 | -5.210598891 | 3.46E-07 | 5.46E-05 |
| VENTX      | -0.893926791 | -0.478181818 | 3.554672078 | -3.370708227 | 8.46E-04 | 1.16E-02 |
| BZRAP1     | 2.484508164  | -0.476322727 | 8.994993831 | -4.321698339 | 2.09E-05 | 9.07E-04 |
| FAM22G     | 2.45417322   | -0.476268831 | 3.000996104 | -4.314003246 | 2.16E-05 | 9.25E-04 |
| RNF150     | 1.148770525  | -0.476241883 | 8.447081006 | -3.970417965 | 8.94E-05 | 2.42E-03 |
| KCTD12     | 1.336861056  | -0.475458766 | 11.85930114 | -4.021536375 | 7.28E-05 | 2.09E-03 |
| PLA2G6     | 3.3791694    | -0.475458442 | 8.683564935 | -4.54348605  | 7.96E-06 | 4.78E-04 |
| BMS1P5     | 6.503592561  | -0.474542532 | 6.033720942 | -5.254203668 | 2.79E-07 | 4.69E-05 |
| FLJ42393   | 1.028476871  | -0.474494156 | 3.467156818 | -3.937412708 | 1.02E-04 | 2.66E-03 |
| NBPF10     | 2.530625096  | -0.473205195 | 8.332013636 | -4.333373786 | 1.99E-05 | 8.87E-04 |
| ANKRD24    | -1.071645937 | -0.471754545 | 3.705547403 | -3.313848157 | 1.03E-03 | 1.33E-02 |
| ABCA10     | -1.595853228 | -0.47164026  | 2.575564286 | -3.140574345 | 1.85E-03 | 1.99E-02 |
| C6orf59    | -0.979902172 | -0.471086364 | 3.400470455 | -3.343312961 | 9.30E-04 | 1.24E-02 |
| ADAM28     | -2.003303851 | -0.471057792 | 7.707672403 | -2.999454942 | 2.93E-03 | 2.74E-02 |
| GNRH1      | -0.106491575 | -0.469774351 | 3.749366071 | -3.612672606 | 3.54E-04 | 6.40E-03 |
| PRICKLE4   | -0.852197769 | -0.467915909 | 5.966044643 | -3.383930704 | 8.07E-04 | 1.13E-02 |
| AHNAK      | 3.422173085  | -0.467097403 | 13.73980714 | -4.553908542 | 7.60E-06 | 4.63E-04 |
| NLRC3      | 3.387094627  | -0.466401299 | 6.072645455 | -4.545408392 | 7.89E-06 | 4.77E-04 |
| FSCN2      | -0.545054811 | -0.46532987  | 4.503585065 | -3.47982263  | 5.74E-04 | 8.94E-03 |
| C8orf42    | -0.965833971 | -0.465213636 | 7.341527597 | -3.347809881 | 9.16E-04 | 1.22E-02 |
| RPL23AP64  | 3.088135612  | -0.464002597 | 2.391451299 | -4.472395254 | 1.09E-05 | 5.87E-04 |
| GOLGA8A    | -1.5699195   | -0.462975974 | 9.201942532 | -3.149355562 | 1.80E-03 | 1.95E-02 |
| NCRNA00201 | 0.063984673  | -0.460746429 | 9.309106656 | -3.663119078 | 2.93E-04 | 5.65E-03 |
| DNAH7      | -2.7682684   | -0.460728896 | 5.377992045 | -2.7159853   | 6.98E-03 | 4.98E-02 |
| DYNC2H1    | 2.011069034  | -0.460653896 | 7.512213961 | -4.200183942 | 3.50E-05 | 1.29E-03 |
| KIAA1875   | -2.466403485 | -0.46007987  | 5.819428247 | -2.831056746 | 4.95E-03 | 3.92E-02 |
| SNED1      | -0.230671641 | -0.458601299 | 8.591557143 | -3.575516094 | 4.06E-04 | 7.01E-03 |
| ANKK1      | -1.982023552 | -0.458278247 | 2.744210227 | -3.00697915  | 2.86E-03 | 2.69E-02 |
| BEAN       | -1.751640461 | -0.45773474  | 4.476889773 | -3.087332722 | 2.20E-03 | 2.24E-02 |
| MALAT1     | 0.27671273   | -0.457039286 | 14.33638425 | -3.725192413 | 2.32E-04 | 4.77E-03 |
| GPRASP1    | 1.00168641   | -0.456801948 | 5.928421753 | -3.930028186 | 1.05E-04 | 2.72E-03 |
| FAM154B    | -2.761822075 | -0.456711364 | 4.803903409 | -2.718490979 | 6.93E-03 | 4.96E-02 |
| SLC25A27   | -1.06031073  | -0.456703571 | 6.692808604 | -3.317501768 | 1.02E-03 | 1.32E-02 |
| ARHGEF10   | 1.678821242  | -0.456636364 | 8.655308442 | -4.113012118 | 5.02E-05 | 1.61E-03 |
| TNFRSF10D  | -1.386606128 | -0.456163312 | 6.198984578 | -3.210785285 | 1.46E-03 | 1.71E-02 |

|              |              |              |             |              |          |          |
|--------------|--------------|--------------|-------------|--------------|----------|----------|
| SPDYE6       | 0.348519525  | -0.456012662 | 5.59103263  | -3.745933637 | 2.15E-04 | 4.50E-03 |
| LOC100131434 | -1.232727262 | -0.455689286 | 5.897721591 | -3.261517037 | 1.23E-03 | 1.50E-02 |
| CCDC154      | -2.632386424 | -0.455543182 | 3.475015422 | -2.768345864 | 5.98E-03 | 4.48E-02 |
| EFCAB6       | -0.471231886 | -0.454528571 | 5.214705195 | -3.502509186 | 5.29E-04 | 8.46E-03 |
| C16orf3      | 1.136306263  | -0.452353571 | 1.945600487 | -3.96700959  | 9.06E-05 | 2.44E-03 |
| PHLDB2       | -2.328095003 | -0.452162987 | 7.347069805 | -2.882323467 | 4.23E-03 | 3.54E-02 |
| LOC100128842 | -1.031364773 | -0.450923052 | 5.059394968 | -3.326814843 | 9.85E-04 | 1.29E-02 |
| C3orf35      | 1.937377313  | -0.449654545 | 3.121292857 | -4.180989019 | 3.79E-05 | 1.37E-03 |
| LOC286367    | 2.155582651  | -0.44855974  | 5.17159026  | -4.237602094 | 2.99E-05 | 1.16E-03 |
| FBXO41       | 1.597382033  | -0.448224675 | 8.703892857 | -4.091392718 | 5.48E-05 | 1.71E-03 |
| LOC283922    | 1.76563336   | -0.447269156 | 6.234674513 | -4.135946788 | 4.57E-05 | 1.55E-03 |
| KCTD19       | -2.58621711  | -0.44486461  | 2.647595617 | -2.785923764 | 5.67E-03 | 4.31E-02 |
| P2RX6        | -2.223201652 | -0.444753247 | 2.365419481 | -2.920636353 | 3.75E-03 | 3.25E-02 |
| KIAA1407     | 2.52410438   | -0.441571753 | 7.514672565 | -4.331724616 | 2.01E-05 | 8.87E-04 |
| BCO2         | -1.615447568 | -0.441419156 | 4.225209903 | -3.133924393 | 1.89E-03 | 2.01E-02 |
| MMP16        | -2.354844513 | -0.441325325 | 3.434202273 | -2.872475793 | 4.36E-03 | 3.61E-02 |
| TUBGCP6      | 7.892844586  | -0.441321753 | 9.019867695 | -5.545439958 | 6.33E-08 | 1.68E-05 |
| TLN2         | 2.34002931   | -0.440930195 | 9.130925812 | -4.284939088 | 2.45E-05 | 1.01E-03 |
| CACNB2       | 2.068250546  | -0.440418831 | 4.163225649 | -4.215024864 | 3.29E-05 | 1.23E-03 |
| C9orf84      | 1.353814441  | -0.439893831 | 2.014915422 | -4.026115265 | 7.15E-05 | 2.07E-03 |
| KIAA1529     | -1.480454317 | -0.43988539  | 6.488004058 | -3.179474538 | 1.63E-03 | 1.82E-02 |
| ACRC         | -1.653216741 | -0.439571104 | 4.23969237  | -3.121068832 | 1.97E-03 | 2.07E-02 |
| EFHA2        | -1.257054134 | -0.439378247 | 5.399319318 | -3.253545855 | 1.27E-03 | 1.52E-02 |
| TSSK3        | -0.224439001 | -0.438533117 | 4.379152273 | -3.577389423 | 4.03E-04 | 6.99E-03 |
| AHSA2        | 1.669927933  | -0.438423052 | 8.518528084 | -4.110656177 | 5.07E-05 | 1.61E-03 |
| ABCA2        | -0.363733981 | -0.437248377 | 10.29530828 | -3.535304638 | 4.70E-04 | 7.79E-03 |
| WDR19        | 6.554999878  | -0.435828896 | 8.649210877 | -5.265216018 | 2.64E-07 | 4.67E-05 |
| SPDYE5       | 0.489853078  | -0.435735714 | 4.057984091 | -3.786455476 | 1.84E-04 | 4.04E-03 |
| NBPF9        | 5.734823811  | -0.435193831 | 7.001000487 | -5.087162341 | 6.34E-07 | 8.18E-05 |
| WDR27        | 1.369979996  | -0.435098052 | 7.168269805 | -4.030477029 | 7.02E-05 | 2.05E-03 |
| KIAA1530     | 3.316971844  | -0.434563636 | 7.311133766 | -4.528374784 | 8.52E-06 | 4.99E-04 |
| LUZP2        | -1.844649198 | -0.434287013 | 1.920082468 | -3.055131864 | 2.45E-03 | 2.43E-02 |
| LOC339047    | -0.827928702 | -0.43419513  | 8.760143344 | -3.391598776 | 7.86E-04 | 1.11E-02 |
| TAS2R5       | -1.950644207 | -0.434119805 | 3.573628409 | -3.018041934 | 2.76E-03 | 2.63E-02 |
| BAHCC1       | -2.73209979  | -0.433775649 | 6.722968019 | -2.730015696 | 6.70E-03 | 4.83E-02 |
| ADAMTS10     | -2.621475464 | -0.433681494 | 6.526609903 | -2.772509507 | 5.90E-03 | 4.43E-02 |
| BNC2         | -2.271283186 | -0.43255     | 8.456563312 | -2.903133606 | 3.96E-03 | 3.38E-02 |
| SLC35E2      | -1.069310171 | -0.432367857 | 6.377749188 | -3.314601337 | 1.03E-03 | 1.33E-02 |
| ARGFXP2      | 3.338051005  | -0.432181169 | 1.809913312 | -4.533501001 | 8.32E-06 | 4.92E-04 |
| FDPSL2A      | 0.57229418   | -0.432073377 | 3.092963312 | -3.809911382 | 1.68E-04 | 3.80E-03 |
| ZNF462       | -2.347019791 | -0.43150487  | 8.524698214 | -2.875359719 | 4.32E-03 | 3.59E-02 |
| VNIR1        | -1.239931391 | -0.429230195 | 4.304576461 | -3.259158353 | 1.24E-03 | 1.50E-02 |
| GHRL         | -1.374480212 | -0.428862013 | 2.633907955 | -3.214810111 | 1.44E-03 | 1.69E-02 |
| TANC2        | 2.278958409  | -0.42872013  | 9.641576948 | -4.26931706  | 2.62E-05 | 1.07E-03 |
| ZNF514       | 7.354729905  | -0.428405519 | 7.445886201 | -5.434151591 | 1.12E-07 | 2.51E-05 |

|              |              |              |             |              |          |          |
|--------------|--------------|--------------|-------------|--------------|----------|----------|
| IGF1R        | -1.094703337 | -0.428305519 | 10.93783166 | -3.306404633 | 1.06E-03 | 1.35E-02 |
| DNHD1        | -1.304983765 | -0.427272723 | 7.634228247 | -3.237787305 | 1.34E-03 | 1.59E-02 |
| SMCR5        | 0.665386698  | -0.425041234 | 1.523341071 | -3.836241399 | 1.52E-04 | 3.55E-03 |
| LOC100131551 | -2.147213109 | -0.424844156 | 2.380866883 | -2.948097765 | 3.44E-03 | 3.08E-02 |
| PIWIL2       | -1.325243776 | -0.424545455 | 1.739212987 | -3.231104589 | 1.37E-03 | 1.62E-02 |
| C6orf163     | 0.863285804  | -0.424212987 | 2.926315584 | -3.891678415 | 1.22E-04 | 3.04E-03 |
| KIAA1671     | 0.728313773  | -0.423943506 | 10.77510422 | -3.853947193 | 1.42E-04 | 3.35E-03 |
| HEG1         | -0.840166325 | -0.423420779 | 10.31609545 | -3.387734176 | 7.97E-04 | 1.12E-02 |
| NAIP         | 0.853738734  | -0.423309091 | 5.66906039  | -3.889020419 | 1.23E-04 | 3.06E-03 |
| MSRB3        | -1.316585989 | -0.419763636 | 8.023159091 | -3.233961914 | 1.35E-03 | 1.61E-02 |
| WFDC8        | -2.53572451  | -0.419570455 | 1.382140747 | -2.805027936 | 5.35E-03 | 4.16E-02 |
| EME2         | -0.25845895  | -0.419187987 | 4.530598864 | -3.56715315  | 4.18E-04 | 7.18E-03 |
| C15orf28     | -0.854254348 | -0.418977922 | 3.610845455 | -3.383280167 | 8.09E-04 | 1.13E-02 |
| RPS15AP10    | 0.319810456  | -0.417341558 | 3.274754545 | -3.737653658 | 2.21E-04 | 4.61E-03 |
| SPATA13      | 1.034686019  | -0.416510065 | 8.059393669 | -3.939122417 | 1.01E-04 | 2.65E-03 |
| LOC283314    | -0.721642849 | -0.416063312 | 6.54465211  | -3.424993773 | 6.98E-04 | 1.02E-02 |
| NKTR         | 5.899956394  | -0.415807792 | 9.821490909 | -5.123426214 | 5.31E-07 | 7.32E-05 |
| LOC728264    | -2.151394731 | -0.415444481 | 6.433471266 | -2.946592852 | 3.46E-03 | 3.09E-02 |
| SIGLEC16     | -2.342025896 | -0.415098701 | 3.499324675 | -2.877198869 | 4.29E-03 | 3.58E-02 |
| C22orf36     | -2.658866359 | -0.414816558 | 7.63485276  | -2.75821625  | 6.16E-03 | 4.57E-02 |
| PLGLB2       | 0.637532615  | -0.414673701 | 5.098267045 | -3.828380433 | 1.56E-04 | 3.62E-03 |
| TTLL3        | 0.934382581  | -0.414355844 | 9.082640909 | -3.911421156 | 1.13E-04 | 2.87E-03 |
| SRRM2        | 7.429998608  | -0.413601948 | 13.85525682 | -5.449829446 | 1.04E-07 | 2.36E-05 |
| SYNGR1       | -2.736448054 | -0.411888961 | 8.150404221 | -2.728332563 | 6.73E-03 | 4.85E-02 |
| ADAMTS13     | -1.79353673  | -0.411058766 | 6.640051786 | -3.072866871 | 2.31E-03 | 2.32E-02 |
| MLLT6        | 6.500198646  | -0.410688961 | 11.85393279 | -5.253475959 | 2.80E-07 | 4.69E-05 |
| C8orf77      | -2.204323057 | -0.40879026  | 5.471346429 | -2.927481561 | 3.67E-03 | 3.21E-02 |
| ITGA10       | -2.601315761 | -0.40841526  | 4.566611851 | -2.780186912 | 5.77E-03 | 4.35E-02 |
| SNORD1C      | -1.00586574  | -0.408254545 | 4.999337013 | -3.334998904 | 9.58E-04 | 1.26E-02 |
| LOC100271836 | 4.416371576  | -0.407759091 | 8.230928896 | -4.789372969 | 2.61E-06 | 2.18E-04 |
| SPDYE1       | 0.883943224  | -0.407116558 | 3.895727435 | -3.897424039 | 1.19E-04 | 2.99E-03 |
| DAD1L        | -0.937583435 | -0.40587987  | 0.915119156 | -3.356823333 | 8.88E-04 | 1.20E-02 |
| TTBK2        | 3.889827592  | -0.405265909 | 5.817873539 | -4.665944158 | 4.59E-06 | 3.26E-04 |
| WDR90        | 2.585777756  | -0.404457143 | 9.30667013  | -4.347300536 | 1.88E-05 | 8.58E-04 |
| PI4KAP1      | -0.541104741 | -0.402992532 | 7.722889448 | -3.481039976 | 5.72E-04 | 8.93E-03 |
| NCRNA00107   | -0.531220015 | -0.402957143 | 3.091366883 | -3.484084567 | 5.66E-04 | 8.86E-03 |
| OBSCN        | -0.056510026 | -0.402572078 | 10.10710162 | -3.627529374 | 3.35E-04 | 6.20E-03 |
| ATG16L2      | 2.121356852  | -0.402184091 | 7.863786526 | -4.228766717 | 3.10E-05 | 1.19E-03 |
| LOC100132287 | 0.500477984  | -0.401936364 | 8.387015584 | -3.789485837 | 1.82E-04 | 4.00E-03 |
| SOX10        | -0.913411082 | -0.40118539  | 1.644353409 | -3.364517854 | 8.64E-04 | 1.18E-02 |
| TNKS         | 3.660365726  | -0.401018182 | 9.947505195 | -4.611266746 | 5.88E-06 | 3.89E-04 |
| SLC7A5P2     | -0.214864116 | -0.40005974  | 4.062535714 | -3.58026557  | 3.99E-04 | 6.95E-03 |
| LOC100128288 | 0.602988876  | -0.399643506 | 5.081389935 | -3.818611157 | 1.62E-04 | 3.71E-03 |
| DNAH1        | -1.722838227 | -0.399359416 | 7.519306656 | -3.097240733 | 2.13E-03 | 2.19E-02 |
| CASKIN1      | -2.446431062 | -0.399269481 | 6.576626948 | -2.838514053 | 4.83E-03 | 3.87E-02 |

|              |              |              |             |              |          |          |
|--------------|--------------|--------------|-------------|--------------|----------|----------|
| MDN1         | 2.956693062  | -0.399172403 | 9.387711851 | -4.439962562 | 1.26E-05 | 6.43E-04 |
| RNF207       | -2.144565378 | -0.399103571 | 8.225495617 | -2.949050274 | 3.43E-03 | 3.08E-02 |
| MICAL3       | 2.191501749  | -0.398586364 | 10.56926526 | -4.246857081 | 2.88E-05 | 1.14E-03 |
| FOXK1        | 3.197954425  | -0.397483442 | 10.23087971 | -4.499335697 | 9.68E-06 | 5.42E-04 |
| LOC91316     | -0.491932978 | -0.396969156 | 7.716914123 | -3.496161204 | 5.42E-04 | 8.60E-03 |
| C14orf139    | -2.602511041 | -0.396382792 | 4.650833929 | -2.779732276 | 5.78E-03 | 4.36E-02 |
| IFFO2        | -0.48683873  | -0.396286364 | 7.650065909 | -3.497724337 | 5.39E-04 | 8.58E-03 |
| DFNB59       | -0.124110916 | -0.395005195 | 4.368640909 | -3.607421992 | 3.61E-04 | 6.48E-03 |
| SPTBN2       | -0.323705119 | -0.394616883 | 11.04114351 | -3.547445382 | 4.50E-04 | 7.56E-03 |
| LRRN3        | -1.590032062 | -0.393869156 | 3.546688799 | -3.142547402 | 1.84E-03 | 1.98E-02 |
| CHKB-CPT1B   | 0.25116675   | -0.393713312 | 8.172538149 | -3.717788119 | 2.39E-04 | 4.86E-03 |
| ATM          | 7.867718965  | -0.393362662 | 9.311574513 | -5.540284225 | 6.50E-08 | 1.69E-05 |
| CBX6         | 0.349963955  | -0.393187338 | 9.207594643 | -3.746349785 | 2.14E-04 | 4.49E-03 |
| PITPNM3      | -0.607261068 | -0.392827922 | 8.773193831 | -3.460599647 | 6.15E-04 | 9.34E-03 |
| PPP1R3E      | 1.737220364  | -0.392775974 | 6.557275649 | -4.128452935 | 4.71E-05 | 1.57E-03 |
| ABCC2        | -2.284950691 | -0.392631169 | 2.523977922 | -2.898140108 | 4.02E-03 | 3.42E-02 |
| PPL          | -1.705131679 | -0.392606169 | 11.16480341 | -3.10331709  | 2.09E-03 | 2.16E-02 |
| SPDYE2       | -0.280341687 | -0.392246104 | 1.612574351 | -3.560554577 | 4.29E-04 | 7.32E-03 |
| CCDC57       | 3.026286258  | -0.392098377 | 8.477194318 | -4.457159985 | 1.17E-05 | 6.17E-04 |
| TRIM66       | 0.376962239  | -0.39201526  | 7.740795617 | -3.754120412 | 2.08E-04 | 4.42E-03 |
| KIAA1377     | -2.403940696 | -0.391941234 | 5.934577435 | -2.854317715 | 4.61E-03 | 3.74E-02 |
| MCC          | -1.594438385 | -0.391888636 | 8.073813474 | -3.141054006 | 1.85E-03 | 1.99E-02 |
| SRGAP3       | 1.065888107  | -0.390606169 | 10.11780666 | -3.947703921 | 9.79E-05 | 2.58E-03 |
| MFHAS1       | -0.064256878 | -0.390326623 | 9.415118506 | -3.625230311 | 3.38E-04 | 6.23E-03 |
| SLC1A7       | -2.309060462 | -0.390168182 | 2.076971104 | -2.88931159  | 4.14E-03 | 3.49E-02 |
| CMTM4        | 4.232862744  | -0.389662338 | 9.991918831 | -4.746669297 | 3.18E-06 | 2.54E-04 |
| BOD1L        | 7.804903444  | -0.389481169 | 9.970528247 | -5.527377512 | 6.95E-08 | 1.70E-05 |
| LOC100133331 | 0.396522961  | -0.389249026 | 7.786426136 | -3.75974124  | 2.04E-04 | 4.35E-03 |
| C12orf51     | 4.567684196  | -0.388987013 | 10.32316818 | -4.824340636 | 2.22E-06 | 1.94E-04 |
| PDE7B        | -0.959134328 | -0.38824513  | 5.82855276  | -3.349949464 | 9.09E-04 | 1.22E-02 |
| PSD3         | -1.002512126 | -0.388230844 | 7.823807955 | -3.33607388  | 9.54E-04 | 1.26E-02 |
| SYNE1        | -0.72507452  | -0.38591461  | 8.14589724  | -3.423920247 | 7.01E-04 | 1.02E-02 |
| DNM3         | -1.948709826 | -0.385594805 | 6.645051948 | -3.018722652 | 2.75E-03 | 2.63E-02 |
| SOX9         | -2.760959257 | -0.385239935 | 10.52365795 | -2.718826189 | 6.92E-03 | 4.95E-02 |
| KIF21B       | -1.094784689 | -0.384602597 | 6.731074675 | -3.306378342 | 1.06E-03 | 1.35E-02 |
| CAPS2        | -2.174564121 | -0.384583766 | 3.792159416 | -2.938241313 | 3.55E-03 | 3.14E-02 |
| RORA         | 0.053977032  | -0.383712987 | 7.387524675 | -3.660175236 | 2.97E-04 | 5.69E-03 |
| TTN          | -2.092961101 | -0.383675    | 6.486115747 | -2.967557123 | 3.24E-03 | 2.95E-02 |
| AGAP8        | 0.305916934  | -0.38358961  | 5.893312338 | -3.733640631 | 2.25E-04 | 4.66E-03 |
| CBX7         | 0.856698987  | -0.38328474  | 8.602074513 | -3.889844757 | 1.23E-04 | 3.06E-03 |
| ITGA7        | -2.182280472 | -0.383155519 | 8.406858604 | -2.935454934 | 3.58E-03 | 3.16E-02 |
| TAL1         | -0.490562164 | -0.383136039 | 3.447055357 | -3.496581892 | 5.41E-04 | 8.60E-03 |
| RASD2        | -2.754083761 | -0.383043506 | 5.937365909 | -2.721495955 | 6.87E-03 | 4.93E-02 |
| C9orf139     | -1.545236213 | -0.382077597 | 2.262901461 | -3.157692158 | 1.75E-03 | 1.91E-02 |
| NCRNA00203   | -1.342302293 | -0.381691883 | 1.76360276  | -3.225467873 | 1.39E-03 | 1.64E-02 |

|              |              |              |             |              |          |          |
|--------------|--------------|--------------|-------------|--------------|----------|----------|
| MLL          | 5.163275916  | -0.380713961 | 10.89064432 | -4.959932185 | 1.17E-06 | 1.28E-04 |
| ANKRD36      | 0.613342431  | -0.380353896 | 7.050100974 | -3.821541609 | 1.61E-04 | 3.68E-03 |
| SLC9A5       | -1.719154732 | -0.379611364 | 4.292557955 | -3.098505718 | 2.12E-03 | 2.18E-02 |
| C20orf117    | 0.849140681  | -0.379220779 | 9.814861039 | -3.887739691 | 1.24E-04 | 3.06E-03 |
| OCLM         | 0.04472756   | -0.378873377 | 1.938056169 | -3.657452492 | 3.00E-04 | 5.73E-03 |
| ZNF224       | -0.288388815 | -0.37814026  | 6.329338312 | -3.558125203 | 4.33E-04 | 7.36E-03 |
| PDXDC2       | -0.512512824 | -0.378003247 | 7.349373701 | -3.489839864 | 5.54E-04 | 8.74E-03 |
| ANKRD36B     | -1.175299675 | -0.376953247 | 5.202037013 | -3.280262795 | 1.16E-03 | 1.43E-02 |
| CDNF         | -1.869555794 | -0.376589935 | 3.926076461 | -3.046454653 | 2.52E-03 | 2.47E-02 |
| LOC100132832 | -1.420168138 | -0.376430844 | 1.99792289  | -3.199620782 | 1.52E-03 | 1.75E-02 |
| KIF13B       | 2.591963729  | -0.376253247 | 8.899117532 | -4.348860125 | 1.86E-05 | 8.56E-04 |
| C3orf42      | 1.377460527  | -0.375599675 | 4.04550211  | -4.032493984 | 6.97E-05 | 2.04E-03 |
| LOC100129726 | -2.018165916 | -0.37523474  | 3.760738474 | -2.994189517 | 2.98E-03 | 2.77E-02 |
| PPP1R12B     | 1.635471701  | -0.375208766 | 8.885030682 | -4.101516918 | 5.26E-05 | 1.66E-03 |
| GARNL3       | -0.836464982 | -0.374368506 | 6.276025487 | -3.388903478 | 7.93E-04 | 1.11E-02 |
| FLJ10213     | 0.823739599  | -0.37375974  | 4.98442013  | -3.880657672 | 1.28E-04 | 3.11E-03 |
| ZNF546       | 0.919435662  | -0.373102273 | 6.125479383 | -3.907278045 | 1.15E-04 | 2.91E-03 |
| MUM1         | 3.216086576  | -0.372942532 | 9.024670292 | -4.503770298 | 9.49E-06 | 5.36E-04 |
| ACACB        | -0.1624752   | -0.372441883 | 8.299386201 | -3.595965038 | 3.76E-04 | 6.69E-03 |
| HERC2P2      | -1.991358462 | -0.372437987 | 9.216310877 | -3.003680732 | 2.89E-03 | 2.71E-02 |
| CEP290       | 0.468075637  | -0.372267532 | 7.380406494 | -3.780237374 | 1.88E-04 | 4.12E-03 |
| TRPM3        | -2.172657519 | -0.372077597 | 1.599257305 | -2.938929403 | 3.54E-03 | 3.14E-02 |
| ERICH1       | 2.485072701  | -0.371817857 | 7.7793125   | -4.321841431 | 2.09E-05 | 9.07E-04 |
| ITGB1BP2     | -2.198800242 | -0.370195455 | 2.393151623 | -2.929481229 | 3.65E-03 | 3.20E-02 |
| C1orf104     | 0.837109596  | -0.369842532 | 6.396495617 | -3.884386785 | 1.26E-04 | 3.08E-03 |
| C20orf165    | -0.202292312 | -0.369732143 | 3.468195617 | -3.584038732 | 3.93E-04 | 6.88E-03 |
| PPFIA2       | -1.942047657 | -0.369655519 | 1.686370942 | -3.021065998 | 2.73E-03 | 2.61E-02 |
| CREB5        | -2.461409376 | -0.368635714 | 6.797778247 | -2.832923191 | 4.92E-03 | 3.91E-02 |
| CRAMPIL      | 5.756727924  | -0.368204545 | 9.734240584 | -5.091985035 | 6.19E-07 | 8.04E-05 |
| CEP110       | 1.582605571  | -0.367402273 | 8.10182289  | -4.08745912  | 5.57E-05 | 1.72E-03 |
| DISC1        | 0.980263231  | -0.366988961 | 7.193458766 | -3.924114095 | 1.07E-04 | 2.76E-03 |
| ANKRD23      | 0.549092248  | -0.366878571 | 5.419811364 | -3.803323305 | 1.72E-04 | 3.86E-03 |
| TBC1D4       | 2.429694326  | -0.366370455 | 8.279149838 | -4.307784828 | 2.22E-05 | 9.39E-04 |
| BREA2        | -1.560733229 | -0.365991234 | 2.855011526 | -3.152460565 | 1.78E-03 | 1.93E-02 |
| C9orf102     | 3.256510759  | -0.365751948 | 5.806718182 | -4.513643212 | 9.09E-06 | 5.18E-04 |
| SLC26A1      | -1.493801485 | -0.365743506 | 6.042263961 | -3.174998086 | 1.65E-03 | 1.84E-02 |
| HERC1        | 8.27617382   | -0.36548474  | 9.457856981 | -5.623622847 | 4.21E-08 | 1.25E-05 |
| SLC10A5      | -0.753456005 | -0.365340909 | 2.187056818 | -3.415029749 | 7.23E-04 | 1.04E-02 |
| DAB2IP       | 5.045720248  | -0.364871429 | 10.69920325 | -4.933420624 | 1.33E-06 | 1.39E-04 |
| MYSM1        | 0.724912995  | -0.363765909 | 5.831080032 | -3.852992198 | 1.42E-04 | 3.36E-03 |
| FLJ14107     | -0.153610463 | -0.363299351 | 1.604563312 | -3.598615336 | 3.73E-04 | 6.65E-03 |
| FMNL2        | 6.022551925  | -0.363177922 | 10.22993636 | -5.150210371 | 4.66E-07 | 6.71E-05 |
| ZNF517       | 2.482924786  | -0.362508442 | 8.729759416 | -4.321296981 | 2.10E-05 | 9.07E-04 |
| LOC389791    | -2.316226978 | -0.361888636 | 3.1047875   | -2.886682435 | 4.17E-03 | 3.51E-02 |
| EVPL         | -1.916673176 | -0.36183961  | 10.1264276  | -3.029975587 | 2.65E-03 | 2.57E-02 |



|            |              |              |             |              |          |          |
|------------|--------------|--------------|-------------|--------------|----------|----------|
| ZNF250     | 3.043518201  | -0.361464286 | 9.081846429 | -4.461409276 | 1.14E-05 | 6.08E-04 |
| TRIM56     | 2.496464277  | -0.36123961  | 9.069969805 | -4.324727941 | 2.07E-05 | 9.05E-04 |
| CEMP1      | 2.658019694  | -0.360731818 | 6.310610714 | -4.365483377 | 1.74E-05 | 8.15E-04 |
| TAS2R14    | -1.859255873 | -0.359720779 | 2.606668182 | -3.050045854 | 2.49E-03 | 2.45E-02 |
| SPDYE7P    | -1.847874495 | -0.359470455 | 2.204050487 | -3.054009507 | 2.46E-03 | 2.43E-02 |
| PLXNB1     | 1.306052009  | -0.359435065 | 12.24402922 | -4.013203261 | 7.53E-05 | 2.15E-03 |
| SLC4A7     | 5.028204914  | -0.359261364 | 8.94764724  | -4.929460164 | 1.35E-06 | 1.40E-04 |
| ANKRD44    | -2.695212952 | -0.359212338 | 5.353369805 | -2.744254422 | 6.42E-03 | 4.70E-02 |
| ZZEF1      | 5.793642211  | -0.358971429 | 9.722535714 | -5.100103907 | 5.95E-07 | 7.85E-05 |
| HIC2       | 0.026127219  | -0.358535065 | 7.491065584 | -3.65197154  | 3.06E-04 | 5.82E-03 |
| NBPF14     | -0.351580244 | -0.358516558 | 7.760535877 | -3.53899491  | 4.64E-04 | 7.72E-03 |
| FAM86B1    | -2.425436669 | -0.357530844 | 7.321659253 | -2.846332991 | 4.72E-03 | 3.80E-02 |
| C22orf23   | 0.594112821  | -0.357240909 | 5.312274351 | -3.816097271 | 1.64E-04 | 3.74E-03 |
| ZC3H7B     | 8.876960304  | -0.357026948 | 11.15436445 | -5.744426945 | 2.22E-08 | 7.35E-06 |
| C6orf174   | -2.711004746 | -0.356139286 | 4.025182955 | -2.738167233 | 6.54E-03 | 4.76E-02 |
| UNKL       | 3.969470635  | -0.35611039  | 8.416896104 | -4.684792975 | 4.22E-06 | 3.11E-04 |
| PRH2       | -0.664680672 | -0.356046104 | 2.131176948 | -3.442768007 | 6.56E-04 | 9.73E-03 |
| AFAP1      | 0.108591969  | -0.356009416 | 9.916271916 | -3.676214546 | 2.79E-04 | 5.49E-03 |
| H6PD       | 1.134859658  | -0.355616234 | 11.41784058 | -3.966613843 | 9.08E-05 | 2.44E-03 |
| MYC        | -2.401719936 | -0.355497078 | 11.56000731 | -2.855141416 | 4.59E-03 | 3.73E-02 |
| C17orf69   | 0.904373657  | -0.355455519 | 5.464415747 | -3.90309902  | 1.17E-04 | 2.94E-03 |
| HIVEP2     | 1.843773191  | -0.35525974  | 10.45839481 | -4.156493886 | 4.20E-05 | 1.46E-03 |
| FAT4       | -2.719651835 | -0.354955195 | 6.499584091 | -2.734828623 | 6.60E-03 | 4.79E-02 |
| MYST3      | 5.443520562  | -0.354682143 | 11.01416932 | -5.022655816 | 8.66E-07 | 1.02E-04 |
| TMOD2      | -2.208566528 | -0.354225325 | 6.88308474  | -2.925944234 | 3.69E-03 | 3.22E-02 |
| SHPRH      | 1.734891613  | -0.35418539  | 7.614140422 | -4.127838195 | 4.72E-05 | 1.57E-03 |
| PDPK1      | 10.22191365  | -0.353477597 | 10.15684692 | -6.007807738 | 5.31E-09 | 2.32E-06 |
| ZEB1       | -1.950142301 | -0.353474351 | 7.632962175 | -3.018218571 | 2.76E-03 | 2.63E-02 |
| FBXO21     | -1.187811641 | -0.352816234 | 11.61231591 | -3.276187088 | 1.17E-03 | 1.44E-02 |
| APC2       | -2.352189062 | -0.352780195 | 3.86593263  | -2.873454809 | 4.34E-03 | 3.60E-02 |
| COLQ       | -1.88849295  | -0.351776299 | 5.882635227 | -3.039841568 | 2.57E-03 | 2.51E-02 |
| HIST2H2BA  | -2.336283702 | -0.35137987  | 1.701218506 | -2.879312229 | 4.27E-03 | 3.56E-02 |
| TRIB2      | -2.382965462 | -0.351348377 | 10.07670244 | -2.862088681 | 4.50E-03 | 3.67E-02 |
| FAM160B2   | 5.403637317  | -0.35100487  | 9.685483929 | -5.0137697   | 9.04E-07 | 1.05E-04 |
| NCRNA00182 | 1.552081905  | -0.350438312 | 5.687167857 | -4.079322778 | 5.76E-05 | 1.76E-03 |
| BMS1P4     | -1.428373643 | -0.35028961  | 4.771553247 | -3.196885662 | 1.53E-03 | 1.76E-02 |
| PPM1F      | 3.269774559  | -0.349785714 | 8.729070779 | -4.516878569 | 8.96E-06 | 5.14E-04 |
| C1orf152   | -0.59214574  | -0.34933474  | 3.323905357 | -3.46527963  | 6.05E-04 | 9.27E-03 |
| DIP2C      | -1.559774063 | -0.348093506 | 8.54936039  | -3.152784603 | 1.78E-03 | 1.93E-02 |
| ZNF37B     | 0.024806017  | -0.347940909 | 8.080393182 | -3.651581936 | 3.06E-04 | 5.82E-03 |
| NF1        | -0.875786967 | -0.347894156 | 10.21336656 | -3.376461998 | 8.29E-04 | 1.15E-02 |
| SLC25A25   | 0.980647273  | -0.347663636 | 8.655846104 | -3.924220184 | 1.07E-04 | 2.76E-03 |
| L3MBTL     | -2.490662787 | -0.347086364 | 7.715898377 | -2.821973695 | 5.08E-03 | 4.00E-02 |
| FAM21A     | -0.998490499 | -0.346807468 | 8.454325487 | -3.337362558 | 9.50E-04 | 1.25E-02 |
| ANKRD36BP1 | -0.020000301 | -0.34647987  | 7.541107468 | -3.638346613 | 3.22E-04 | 6.04E-03 |

|              |              |              |             |              |          |          |
|--------------|--------------|--------------|-------------|--------------|----------|----------|
| ATP8B1       | -2.261089549 | -0.345850649 | 9.655287013 | -2.906852631 | 3.92E-03 | 3.36E-02 |
| WDR31        | -0.665682978 | -0.34561039  | 5.400024026 | -3.442455984 | 6.56E-04 | 9.74E-03 |
| RAI1         | 4.111399092  | -0.345179545 | 10.78506932 | -4.718221672 | 3.62E-06 | 2.78E-04 |
| BAT2L1       | 4.470975733  | -0.344992208 | 12.6371026  | -4.802016856 | 2.46E-06 | 2.10E-04 |
| FYCO1        | 4.916929953  | -0.344846753 | 9.748498701 | -4.904236    | 1.52E-06 | 1.54E-04 |
| ZBTB43       | 4.572765522  | -0.344575    | 8.100138474 | -4.825511148 | 2.20E-06 | 1.93E-04 |
| ZC3H6        | 2.442584655  | -0.344448701 | 8.175328896 | -4.311060368 | 2.19E-05 | 9.33E-04 |
| MLL2         | 1.012210295  | -0.344068182 | 11.42284318 | -3.932930479 | 1.04E-04 | 2.69E-03 |
| FAM83H       | -1.30937256  | -0.343479221 | 12.22312143 | -3.236340763 | 1.34E-03 | 1.60E-02 |
| C3orf49      | 4.957566538  | -0.343368182 | 0.707258766 | -4.913460373 | 1.46E-06 | 1.49E-04 |
| PER2         | 1.265939436  | -0.343156818 | 8.896735227 | -4.00233045  | 7.87E-05 | 2.20E-03 |
| ZNF660       | -2.507161863 | -0.343088312 | 4.530512338 | -2.815780328 | 5.18E-03 | 4.06E-02 |
| AKAP13       | 4.121852164  | -0.343070455 | 10.71310049 | -4.720675647 | 3.58E-06 | 2.76E-04 |
| NPY6R        | -2.187727513 | -0.342736039 | 1.259789123 | -2.933486501 | 3.60E-03 | 3.17E-02 |
| GRLF1        | 2.121368051  | -0.342384091 | 11.00945341 | -4.228769611 | 3.10E-05 | 1.19E-03 |
| NPHP3        | 4.58659871   | -0.342319156 | 8.044470942 | -4.82869647  | 2.17E-06 | 1.91E-04 |
| LOC100132724 | 2.198930918  | -0.341603247 | 2.010125    | -4.248769069 | 2.85E-05 | 1.13E-03 |
| TNFRSF10A    | -1.237324002 | -0.341390909 | 6.023288312 | -3.260012214 | 1.24E-03 | 1.50E-02 |
| GOLGA6L9     | -2.580624536 | -0.340941234 | 7.692465747 | -2.788045863 | 5.63E-03 | 4.30E-02 |
| MAG11        | -1.317094275 | -0.340525    | 9.20249789  | -3.23379423  | 1.35E-03 | 1.61E-02 |
| C7orf63      | -2.370290459 | -0.340512662 | 6.273105357 | -2.866774889 | 4.43E-03 | 3.64E-02 |
| KIAA1109     | 3.657473056  | -0.339998377 | 9.379693669 | -4.610573887 | 5.90E-06 | 3.89E-04 |
| LOC285696    | -1.44091893  | -0.33969513  | 0.984986201 | -3.192699745 | 1.56E-03 | 1.77E-02 |
| ZCWPW1       | -2.142455816 | -0.339632468 | 6.163746104 | -2.949808973 | 3.42E-03 | 3.07E-02 |
| ZNF471       | -1.453429119 | -0.339622727 | 6.722791883 | -3.188520431 | 1.58E-03 | 1.79E-02 |
| NBEAL2       | 1.285280583  | -0.339345455 | 10.60249286 | -4.007576315 | 7.70E-05 | 2.18E-03 |
| KIAA1908     | -2.65638971  | -0.339085065 | 6.503221753 | -2.759165163 | 6.14E-03 | 4.56E-02 |
| MPP3         | -2.689147513 | -0.338941234 | 5.710554058 | -2.746589029 | 6.38E-03 | 4.68E-02 |
| BTAF1        | 4.227175238  | -0.338685065 | 9.11801461  | -4.745340514 | 3.19E-06 | 2.54E-04 |
| PRICKLE2     | -1.193913156 | -0.338606169 | 7.950364448 | -3.27419784  | 1.18E-03 | 1.45E-02 |
| SGK196       | -1.421400544 | -0.338474026 | 6.001288961 | -3.199210127 | 1.52E-03 | 1.75E-02 |
| FAM63B       | 1.848087429  | -0.338317857 | 7.524128084 | -4.157625694 | 4.18E-05 | 1.46E-03 |
| LENG8        | -1.511991975 | -0.338271429 | 11.62968052 | -3.168887739 | 1.68E-03 | 1.86E-02 |
| TBC1D3       | -1.246066716 | -0.337975974 | 8.071336688 | -3.257148349 | 1.25E-03 | 1.51E-02 |
| LOC729603    | -2.472840563 | -0.337590909 | 4.241449351 | -2.8286493   | 4.98E-03 | 3.94E-02 |
| OMG          | -0.769912654 | -0.337462338 | 1.669692857 | -3.409864892 | 7.37E-04 | 1.06E-02 |
| ZNF667       | -2.511981921 | -0.33535487  | 7.238431006 | -2.813968553 | 5.21E-03 | 4.08E-02 |
| PTCH1        | 0.15246997   | -0.33513474  | 8.733553409 | -3.689054501 | 2.66E-04 | 5.28E-03 |
| SAMD4A       | -0.705935048 | -0.334912338 | 7.910423052 | -3.429903662 | 6.86E-04 | 1.01E-02 |
| ACVR2B       | -0.604839225 | -0.333998377 | 8.958747565 | -3.461349887 | 6.14E-04 | 9.33E-03 |
| TACC1        | -2.019120211 | -0.333877597 | 9.894227435 | -2.993851126 | 2.98E-03 | 2.77E-02 |
| RALGPS2      | -2.005742223 | -0.333518831 | 8.638517208 | -2.998591657 | 2.93E-03 | 2.74E-02 |
| PDZK1P1      | -2.399184338 | -0.333467857 | 3.148982955 | -2.856081619 | 4.58E-03 | 3.72E-02 |
| ZBTB34       | 4.833935272  | -0.333427597 | 8.171303084 | -4.885350512 | 1.66E-06 | 1.66E-04 |
| MAML2        | -0.821044208 | -0.333357143 | 9.517188961 | -3.393771086 | 7.80E-04 | 1.10E-02 |

|              |              |              |             |              |          |          |
|--------------|--------------|--------------|-------------|--------------|----------|----------|
| VAV2         | -1.181119128 | -0.333308442 | 9.604586039 | -3.278367725 | 1.16E-03 | 1.44E-02 |
| AGAP4        | 1.354628495  | -0.333111688 | 7.148719481 | -4.026335013 | 7.14E-05 | 2.07E-03 |
| ZNF483       | -2.453607752 | -0.333084091 | 3.723690422 | -2.835836558 | 4.87E-03 | 3.88E-02 |
| LOC100170939 | -0.701539045 | -0.332284091 | 7.145121591 | -3.431276588 | 6.83E-04 | 1.00E-02 |
| FKBP1AP1     | -1.783998911 | -0.332046429 | 2.449406006 | -3.076165678 | 2.29E-03 | 2.31E-02 |
| LOC100189589 | -2.585290773 | -0.331981169 | 1.182722403 | -2.786275368 | 5.66E-03 | 4.31E-02 |
| NFAT5        | 1.582869182  | -0.331922727 | 9.940598377 | -4.087529325 | 5.57E-05 | 1.72E-03 |
| UBE2Q2P1     | -2.646173223 | -0.331890584 | 3.523904708 | -2.763076274 | 6.07E-03 | 4.53E-02 |
| SPG11        | 7.559385769  | -0.331853571 | 10.07516932 | -5.476693964 | 9.03E-08 | 2.11E-05 |
| MYCBP2       | 2.542962596  | -0.331790909 | 9.820157143 | -4.336492581 | 1.97E-05 | 8.84E-04 |
| PCM1         | 3.73558679   | -0.331578247 | 10.33699854 | -4.629252339 | 5.42E-06 | 3.71E-04 |
| TNRC6C       | -2.575705937 | -0.330775974 | 8.968375    | -2.789910957 | 5.60E-03 | 4.29E-02 |
| LOC90110     | 5.523189339  | -0.330451948 | 7.40055     | -5.040366736 | 7.95E-07 | 9.53E-05 |
| CDC42EP1     | -1.889697658 | -0.330373052 | 11.3354401  | -3.039420412 | 2.57E-03 | 2.51E-02 |
| KLHDC1       | -0.087632158 | -0.329405844 | 5.511186039 | -3.618285034 | 3.47E-04 | 6.31E-03 |
| LOC100272146 | -1.014440832 | -0.32939513  | 5.206619968 | -3.332248761 | 9.67E-04 | 1.27E-02 |
| LOC642826    | -0.682325027 | -0.329023701 | 5.911393344 | -3.437271412 | 6.69E-04 | 9.88E-03 |
| TTC12        | -1.031607327 | -0.328783442 | 7.518008279 | -3.326736904 | 9.85E-04 | 1.29E-02 |
| MDM4         | 2.702226083  | -0.328744156 | 9.639142857 | -4.376577077 | 1.65E-05 | 7.87E-04 |
| IFT140       | 1.267122371  | -0.328630844 | 9.6342625   | -4.002651472 | 7.86E-05 | 2.20E-03 |
| FNDC8        | 0.229642094  | -0.328417857 | 3.775210552 | -3.711538931 | 2.45E-04 | 4.95E-03 |
| SPEN         | 3.832602429  | -0.328116558 | 11.53065666 | -4.652360232 | 4.88E-06 | 3.42E-04 |
| PLEKHH1      | -2.407992306 | -0.32709513  | 8.697125162 | -2.852814354 | 4.63E-03 | 3.75E-02 |
| D2HGDH       | -0.204632591 | -0.326768506 | 8.900535877 | -3.583336623 | 3.94E-04 | 6.90E-03 |
| ABLIM1       | -1.638558505 | -0.326211039 | 11.87248279 | -3.126063959 | 1.94E-03 | 2.05E-02 |
| LOC349114    | -2.650977163 | -0.326077597 | 6.579381331 | -2.761237869 | 6.10E-03 | 4.54E-02 |
| DIXDC1       | 0.619623897  | -0.325801299 | 8.077180519 | -3.823318512 | 1.59E-04 | 3.68E-03 |
| STXBP1       | 2.204216106  | -0.325401623 | 10.03902971 | -4.250128812 | 2.84E-05 | 1.13E-03 |
| NR2C2        | 5.155773826  | -0.325332143 | 10.04833133 | -4.958243875 | 1.18E-06 | 1.28E-04 |
| ZFP106       | 5.759337608  | -0.324794481 | 9.977390422 | -5.092559361 | 6.17E-07 | 8.04E-05 |
| PALM2-AKAP2  | 0.176498785  | -0.324632468 | 9.146394156 | -3.696068769 | 2.59E-04 | 5.19E-03 |
| YPEL4        | -2.0529162   | -0.324497403 | 4.359697403 | -2.981843815 | 3.09E-03 | 2.85E-02 |
| NPFF         | -1.425145179 | -0.324401948 | 2.845528896 | -3.197962058 | 1.53E-03 | 1.75E-02 |
| ZNF175       | 0.57406477   | -0.324386039 | 7.439640097 | -3.810413708 | 1.68E-04 | 3.80E-03 |
| KIF27        | -0.957405864 | -0.323846429 | 6.416196916 | -3.350501257 | 9.07E-04 | 1.22E-02 |
| CDRT1        | -1.864768199 | -0.323044156 | 1.249224026 | -3.048124404 | 2.50E-03 | 2.46E-02 |
| AKAP9        | 3.369968076  | -0.322743831 | 9.864129383 | -4.541253291 | 8.04E-06 | 4.80E-04 |
| ALS2CR8      | 2.901655476  | -0.322441558 | 7.20545974  | -4.426320639 | 1.33E-05 | 6.71E-04 |
| FAM186B      | -1.281873577 | -0.322348377 | 3.982875162 | -3.245394489 | 1.30E-03 | 1.56E-02 |
| ANKS6        | 3.630763684  | -0.322156818 | 9.520629383 | -4.60417213  | 6.07E-06 | 3.96E-04 |
| LIMCH1       | -2.287548107 | -0.321792857 | 8.844002273 | -2.897190208 | 4.04E-03 | 3.42E-02 |
| TGOLN2       | 11.00156192  | -0.321743182 | 12.32710698 | -6.156412163 | 2.32E-09 | 1.11E-06 |
| PDPR         | -0.721235287 | -0.321718182 | 9.80178961  | -3.425121249 | 6.98E-04 | 1.02E-02 |
| ZFYVE28      | -2.366973302 | -0.321686688 | 7.114933279 | -2.868000114 | 4.42E-03 | 3.63E-02 |
| SLC23A2      | 1.8788384    | -0.321527597 | 9.765114773 | -4.165685055 | 4.04E-05 | 1.44E-03 |

|              |              |              |             |              |          |          |
|--------------|--------------|--------------|-------------|--------------|----------|----------|
| LOC650623    | -2.233328792 | -0.321116883 | 5.769235065 | -2.916958095 | 3.80E-03 | 3.28E-02 |
| ZNF772       | -2.477629909 | -0.321008117 | 7.817243994 | -2.826856841 | 5.01E-03 | 3.96E-02 |
| SLC22A13     | -0.771922    | -0.320970779 | 1.342602273 | -3.409233771 | 7.38E-04 | 1.06E-02 |
| CDK5RAP2     | 4.885747052  | -0.320827597 | 10.10274269 | -4.897147574 | 1.57E-06 | 1.58E-04 |
| DPRXP4       | -0.080002911 | -0.320376299 | 2.403426136 | -3.620553181 | 3.44E-04 | 6.28E-03 |
| ZNF780A      | -0.664674681 | -0.320333442 | 7.580938474 | -3.442769872 | 6.56E-04 | 9.73E-03 |
| SNORA39      | -1.922347695 | -0.320223701 | 3.434378409 | -3.027985266 | 2.67E-03 | 2.58E-02 |
| UBR5         | 5.178646596  | -0.319819805 | 11.01259399 | -4.963389765 | 1.15E-06 | 1.27E-04 |
| KLF6         | -1.753845646 | -0.319741558 | 11.34362857 | -3.086572907 | 2.21E-03 | 2.25E-02 |
| KLHL17       | -2.077381446 | -0.318883442 | 6.622682305 | -2.973123113 | 3.18E-03 | 2.91E-02 |
| LOC646471    | -1.930281805 | -0.31885487  | 6.470354383 | -3.025200338 | 2.69E-03 | 2.59E-02 |
| ZNF445       | 2.378004975  | -0.318396429 | 9.176230357 | -4.294627999 | 2.35E-05 | 9.77E-04 |
| KDM6B        | 0.806989676  | -0.318152922 | 10.29638198 | -3.87598127  | 1.30E-04 | 3.15E-03 |
| TNRC6A       | 7.885646787  | -0.318132143 | 10.17426705 | -5.54396338  | 6.37E-08 | 1.68E-05 |
| MAP3K12      | -0.84509351  | -0.317965584 | 8.824934091 | -3.386177035 | 8.01E-04 | 1.12E-02 |
| FLJ37201     | -2.165523653 | -0.317951299 | 3.426780195 | -2.941502662 | 3.51E-03 | 3.12E-02 |
| TAF1         | 4.185119658  | -0.317303247 | 9.420580195 | -4.735505054 | 3.34E-06 | 2.64E-04 |
| SBF1         | 0.689663808  | -0.317201623 | 10.44849724 | -3.843080997 | 1.48E-04 | 3.48E-03 |
| CHD2         | 6.129680791  | -0.317091883 | 10.50492679 | -5.173520517 | 4.15E-07 | 6.23E-05 |
| C14orf148    | -2.356491963 | -0.316746104 | 3.164667208 | -2.87186825  | 4.36E-03 | 3.62E-02 |
| MLL3         | 2.02964511   | -0.31671526  | 11.11397679 | -4.205010283 | 3.43E-05 | 1.27E-03 |
| IQSEC1       | 3.184120708  | -0.316574026 | 10.24632468 | -4.495949804 | 9.83E-06 | 5.45E-04 |
| FAM118A      | 1.134956548  | -0.316035714 | 7.760612013 | -3.96664035  | 9.08E-05 | 2.44E-03 |
| HERC2        | 1.367916956  | -0.314709091 | 10.05317857 | -4.029920619 | 7.04E-05 | 2.05E-03 |
| MLANA        | -1.229200455 | -0.314636688 | 1.617952435 | -3.26267116  | 1.23E-03 | 1.49E-02 |
| PPP1R3B      | -1.847991426 | -0.314550649 | 8.238405844 | -3.05396881  | 2.46E-03 | 2.43E-02 |
| SPDYE8P      | -1.543218062 | -0.314544481 | 6.319194643 | -3.158372864 | 1.74E-03 | 1.91E-02 |
| C5orf53      | -0.713420115 | -0.314055844 | 6.897852597 | -3.427564817 | 6.92E-04 | 1.01E-02 |
| ERN1         | -1.263233748 | -0.313883766 | 6.391280844 | -3.251518085 | 1.28E-03 | 1.53E-02 |
| TBC1D24      | -0.935425578 | -0.313643831 | 8.318739773 | -3.357510884 | 8.85E-04 | 1.20E-02 |
| EVC          | -0.076419432 | -0.313536039 | 9.36835211  | -3.621618087 | 3.42E-04 | 6.28E-03 |
| CDRT15P      | -2.661158231 | -0.313454221 | 2.473054708 | -2.757337857 | 6.18E-03 | 4.57E-02 |
| MYO18A       | -2.065757287 | -0.312704545 | 9.80534513  | -2.977269576 | 3.14E-03 | 2.88E-02 |
| MGAT5        | -1.213677363 | -0.312643831 | 8.156367045 | -3.267746476 | 1.21E-03 | 1.48E-02 |
| TSPYL6       | -1.055897969 | -0.312577597 | 1.175571591 | -3.318923098 | 1.01E-03 | 1.31E-02 |
| TET2         | 4.056236046  | -0.312300325 | 8.602201786 | -4.705253302 | 3.84E-06 | 2.91E-04 |
| MYH9         | 0.967137506  | -0.31207013  | 14.21652792 | -3.92048663  | 1.09E-04 | 2.80E-03 |
| KIAA0240     | 1.554953258  | -0.312041883 | 9.538876461 | -4.080088779 | 5.74E-05 | 1.75E-03 |
| CCDC27       | -0.877168962 | -0.312038636 | 1.123046266 | -3.376023963 | 8.30E-04 | 1.15E-02 |
| ITPR1        | -2.689649919 | -0.311815909 | 7.734781006 | -2.746395723 | 6.38E-03 | 4.68E-02 |
| LOC100271832 | -2.171282051 | -0.311626623 | 1.277336688 | -2.939425714 | 3.54E-03 | 3.14E-02 |
| TAF1L        | 0.27070451   | -0.311570455 | 4.268255682 | -3.723452186 | 2.34E-04 | 4.79E-03 |
| CHD9         | 4.26395806   | -0.311016234 | 9.394900974 | -4.753928517 | 3.07E-06 | 2.49E-04 |
| MED13L       | 2.507979543  | -0.310848052 | 10.46537208 | -4.327644068 | 2.04E-05 | 8.95E-04 |
| C17orf68     | 3.442902685  | -0.310572403 | 8.751030032 | -4.558925225 | 7.43E-06 | 4.58E-04 |

|              |              |              |             |              |          |          |
|--------------|--------------|--------------|-------------|--------------|----------|----------|
| ZBTB47       | 0.250968882  | -0.310394481 | 9.157644968 | -3.717730717 | 2.39E-04 | 4.86E-03 |
| CROCC        | -1.298365928 | -0.31007013  | 8.874112987 | -3.2399674   | 1.33E-03 | 1.58E-02 |
| NRIP2        | -0.520744963 | -0.310005844 | 5.974013312 | -3.487308312 | 5.59E-04 | 8.78E-03 |
| FRYL         | 5.682995775  | -0.309964935 | 9.412475974 | -5.075735897 | 6.70E-07 | 8.39E-05 |
| ZKSCAN1      | 2.814830771  | -0.30942987  | 9.830322727 | -4.404724571 | 1.46E-05 | 7.18E-04 |
| ZMYND17      | -0.036838489 | -0.308801623 | 6.004226461 | -3.633361392 | 3.28E-04 | 6.10E-03 |
| PLXNA3       | -0.896670008 | -0.308412013 | 11.01010828 | -3.369837314 | 8.48E-04 | 1.17E-02 |
| GIGYF1       | 1.804354808  | -0.30823539  | 10.44914594 | -4.146140038 | 4.38E-05 | 1.50E-03 |
| R3HDM2       | 6.094345767  | -0.308225    | 10.69367906 | -5.16584168  | 4.31E-07 | 6.37E-05 |
| ZNF862       | -0.707217022 | -0.30788961  | 9.339248052 | -3.429503191 | 6.87E-04 | 1.01E-02 |
| SOCS7        | -1.492302724 | -0.307827273 | 5.980066234 | -3.175501043 | 1.65E-03 | 1.84E-02 |
| GOLGA1       | 6.605032888  | -0.307713961 | 8.710155357 | -5.275915673 | 2.50E-07 | 4.46E-05 |
| FBXW2        | 6.886986903  | -0.307490584 | 10.31677354 | -5.335879918 | 1.85E-07 | 3.65E-05 |
| TNRC6B       | 4.482732507  | -0.307481818 | 10.18129351 | -4.804735475 | 2.43E-06 | 2.09E-04 |
| PKD2         | 1.260946419  | -0.307212013 | 8.793581006 | -4.0009752   | 7.91E-05 | 2.21E-03 |
| MAP3K5       | -1.369773254 | -0.306781494 | 7.869828734 | -3.216371175 | 1.44E-03 | 1.68E-02 |
| MLXIP        | 1.654793896  | -0.306143506 | 10.44594513 | -4.106644222 | 5.15E-05 | 1.63E-03 |
| MAML3        | -2.276746124 | -0.305560065 | 8.79699789  | -2.901138666 | 3.99E-03 | 3.40E-02 |
| ASB14        | -0.894726835 | -0.30553539  | 2.965735552 | -3.370454252 | 8.46E-04 | 1.16E-02 |
| FAM168B      | 3.117396349  | -0.305474675 | 10.98536591 | -4.479587235 | 1.06E-05 | 5.72E-04 |
| CIRBP        | 3.423153605  | -0.30543961  | 10.84748734 | -4.554145942 | 7.59E-06 | 4.63E-04 |
| TOM1L2       | 2.477265957  | -0.305161688 | 9.501445779 | -4.3198623   | 2.11E-05 | 9.10E-04 |
| PPP1R13L     | -1.903033173 | -0.304981494 | 9.518789773 | -3.034754757 | 2.61E-03 | 2.54E-02 |
| MAPKBP1      | 0.142317742  | -0.304757792 | 8.644162662 | -3.686087299 | 2.69E-04 | 5.32E-03 |
| TTC28        | -1.453860902 | -0.304726948 | 10.1681112  | -3.188376093 | 1.58E-03 | 1.79E-02 |
| KATNAL1      | -0.902959829 | -0.304617857 | 7.164755357 | -3.367839642 | 8.54E-04 | 1.17E-02 |
| ZNF609       | 3.82083109   | -0.304419156 | 10.52539302 | -4.64956174  | 4.95E-06 | 3.44E-04 |
| EP400        | 0.884147017  | -0.304068831 | 10.66215519 | -3.897480684 | 1.19E-04 | 2.99E-03 |
| BICD2        | 4.017378766  | -0.30294513  | 9.5532625   | -4.696099782 | 4.00E-06 | 2.99E-04 |
| HDAC4        | -0.421799941 | -0.302827273 | 9.090984416 | -3.51762481  | 5.01E-04 | 8.13E-03 |
| WDR81        | -0.105848217 | -0.302807792 | 9.50953961  | -3.612864196 | 3.54E-04 | 6.40E-03 |
| LOC150776    | 0.16326554   | -0.302805519 | 8.68281737  | -3.692207347 | 2.63E-04 | 5.23E-03 |
| CREBBP       | 1.613650143  | -0.302784416 | 11.67375584 | -4.095719501 | 5.39E-05 | 1.69E-03 |
| HEATR7A      | -1.834864541 | -0.302763312 | 10.70009886 | -3.058534415 | 2.42E-03 | 2.41E-02 |
| C20orf194    | -0.697907389 | -0.301883766 | 8.500071104 | -3.432410415 | 6.80E-04 | 1.00E-02 |
| ZNF618       | 1.068050224  | -0.301581494 | 10.49646445 | -3.948297945 | 9.76E-05 | 2.58E-03 |
| RALGPS1      | 0.223345728  | -0.30132013  | 8.652378896 | -3.709709112 | 2.46E-04 | 4.97E-03 |
| LOC100101266 | -2.76306371  | -0.301142532 | 2.239686526 | -2.718008528 | 6.94E-03 | 4.96E-02 |
| LOC652276    | 1.204171864  | -0.300971429 | 5.512622727 | -3.985535849 | 8.42E-05 | 2.32E-03 |
| ZBTB26       | 2.251462757  | -0.300881818 | 6.783724675 | -4.262267112 | 2.70E-05 | 1.09E-03 |
| CREBZF       | 0.438120891  | -0.300835714 | 9.971679545 | -3.771669206 | 1.95E-04 | 4.22E-03 |
| ZNF696       | -0.173466729 | -0.30053961  | 8.251256818 | -3.592676403 | 3.81E-04 | 6.73E-03 |
| GTF2IRD2B    | -1.003420256 | -0.300238961 | 7.249464935 | -3.335782818 | 9.55E-04 | 1.26E-02 |
| TAS2R10      | -1.409476405 | -0.300046753 | 1.04222013  | -3.203181361 | 1.50E-03 | 1.74E-02 |
| PRO0628      | -1.688528078 | -0.299799026 | 2.543923214 | -3.109004837 | 2.05E-03 | 2.13E-02 |

|           |              |              |             |              |          |          |
|-----------|--------------|--------------|-------------|--------------|----------|----------|
| CCDC93    | 4.444392312  | -0.299372403 | 9.0446125   | -4.795864885 | 2.53E-06 | 2.15E-04 |
| GNRHR     | -2.541453061 | -0.298536688 | 1.928568669 | -2.802866718 | 5.39E-03 | 4.17E-02 |
| PARD3B    | -2.359418149 | -0.297398701 | 6.770900649 | -2.870788838 | 4.38E-03 | 3.62E-02 |
| ATRX      | 5.25078204   | -0.297229221 | 10.37402045 | -4.979589236 | 1.06E-06 | 1.20E-04 |
| ZNF34     | 0.232838181  | -0.296893831 | 7.527945942 | -3.712467447 | 2.44E-04 | 4.93E-03 |
| KIAA0368  | 3.897198066  | -0.296076948 | 10.73568231 | -4.667691257 | 4.56E-06 | 3.25E-04 |
| RNASE13   | -2.347420072 | -0.295948701 | 0.980955519 | -2.875212255 | 4.32E-03 | 3.59E-02 |
| CSAD      | -2.567627355 | -0.295805519 | 8.484888149 | -2.792971727 | 5.55E-03 | 4.27E-02 |
| RABGAP1   | 4.607179984  | -0.295263636 | 9.969301299 | -4.833432334 | 2.12E-06 | 1.89E-04 |
| CLCN6     | -0.329912347 | -0.295194805 | 8.973648052 | -3.545565234 | 4.53E-04 | 7.59E-03 |
| RHBDF1    | -1.095947376 | -0.295174675 | 8.826180844 | -3.306002582 | 1.06E-03 | 1.35E-02 |
| ZNF84     | -0.343255573 | -0.295011039 | 9.045616558 | -3.541520512 | 4.60E-04 | 7.65E-03 |
| RNF113B   | -1.502461184 | -0.294881169 | 1.295480195 | -3.172090588 | 1.67E-03 | 1.85E-02 |
| RBMS2     | 1.808441576  | -0.294737987 | 10.3825349  | -4.14721456  | 4.36E-05 | 1.50E-03 |
| FLYWCH1   | 3.852770303  | -0.294547727 | 9.027246266 | -4.657151521 | 4.78E-06 | 3.37E-04 |
| DENND1A   | 6.973409832  | -0.29387987  | 9.896356169 | -5.354148745 | 1.69E-07 | 3.45E-05 |
| SEC16B    | -2.316566735 | -0.293167208 | 7.157694968 | -2.886557734 | 4.17E-03 | 3.51E-02 |
| PILRB     | -2.131943373 | -0.293062662 | 9.767901136 | -2.953587005 | 3.38E-03 | 3.05E-02 |
| WDR35     | -1.563004205 | -0.292962662 | 8.62864724  | -3.151693231 | 1.78E-03 | 1.94E-02 |
| LOC200030 | 1.722840338  | -0.292762987 | 8.662300325 | -4.124655617 | 4.78E-05 | 1.58E-03 |
| SRGAP1    | -1.457669625 | -0.292519156 | 9.551766396 | -3.187102632 | 1.59E-03 | 1.79E-02 |
| RASA4     | -0.891950434 | -0.292509416 | 8.478455682 | -3.371335549 | 8.44E-04 | 1.16E-02 |
| KIAA2018  | 1.781699366  | -0.292093831 | 9.249816721 | -4.140178806 | 4.49E-05 | 1.53E-03 |
| LYST      | -0.588373403 | -0.292093831 | 7.690495292 | -3.466446706 | 6.03E-04 | 9.25E-03 |
| MYH10     | -2.151292548 | -0.291974675 | 11.54928994 | -2.946629635 | 3.46E-03 | 3.09E-02 |
| SEC1      | -2.670675502 | -0.29173474  | 2.636085877 | -2.753687378 | 6.24E-03 | 4.61E-02 |
| ZNF780B   | -1.866928517 | -0.291628247 | 7.764864448 | -3.047371065 | 2.51E-03 | 2.46E-02 |
| SMC5      | 2.606151209  | -0.291620455 | 9.623236526 | -4.35243517  | 1.84E-05 | 8.46E-04 |
| EZH1      | 2.379952105  | -0.291255195 | 9.008321753 | -4.295124259 | 2.34E-05 | 9.77E-04 |
| TMTC2     | -1.833523078 | -0.291056818 | 8.369519643 | -3.059000624 | 2.42E-03 | 2.41E-02 |
| CHD3      | 0.527075373  | -0.29097987  | 12.02176591 | -3.797062133 | 1.76E-04 | 3.93E-03 |
| TSNARE1   | -0.975296736 | -0.290924351 | 8.514349513 | -3.344785712 | 9.26E-04 | 1.23E-02 |
| SHPK      | 1.998294395  | -0.290883766 | 8.257080195 | -4.196862041 | 3.55E-05 | 1.29E-03 |
| EYS       | -1.981602709 | -0.290880844 | 2.990603084 | -3.007127771 | 2.86E-03 | 2.69E-02 |
| CERK      | -0.55539438  | -0.290573377 | 10.15931916 | -3.476634286 | 5.81E-04 | 9.00E-03 |
| ZNF337    | 0.81753437   | -0.290504545 | 8.623796429 | -3.878925831 | 1.28E-04 | 3.12E-03 |
| ATXN7     | 3.440486257  | -0.290306494 | 9.274981818 | -4.558340683 | 7.45E-06 | 4.58E-04 |
| NEIL2     | -0.323474227 | -0.290080844 | 8.50919724  | -3.547515301 | 4.50E-04 | 7.56E-03 |
| ZNF70     | -0.03606567  | -0.289953571 | 7.27886737  | -3.633590335 | 3.28E-04 | 6.10E-03 |
| IRGQ      | -0.937308374 | -0.289903896 | 9.273833766 | -3.356910982 | 8.87E-04 | 1.20E-02 |
| TXNIP     | -2.583632287 | -0.289558117 | 12.81687614 | -2.786904765 | 5.65E-03 | 4.31E-02 |
| SETD5     | 3.711079996  | -0.28944026  | 11.36001818 | -4.623399338 | 5.57E-06 | 3.78E-04 |
| TBC1D14   | 3.296882531  | -0.289177922 | 10.68040974 | -4.523484581 | 8.70E-06 | 5.09E-04 |
| SNX30     | -0.310189547 | -0.288825649 | 8.746661201 | -3.55153604  | 4.43E-04 | 7.49E-03 |
| ANKS3     | 0.950298961  | -0.288662013 | 7.824156006 | -3.915828644 | 1.11E-04 | 2.84E-03 |

|              |              |              |             |              |          |          |
|--------------|--------------|--------------|-------------|--------------|----------|----------|
| TEP1         | -0.171572599 | -0.288510065 | 8.561576786 | -3.593243318 | 3.80E-04 | 6.73E-03 |
| DOCK9        | -1.272539391 | -0.287928571 | 9.991967532 | -3.248462319 | 1.29E-03 | 1.54E-02 |
| OGT          | -0.307793455 | -0.287826948 | 11.5346099  | -3.552260796 | 4.42E-04 | 7.49E-03 |
| PDGFC        | -1.725649433 | -0.287259416 | 9.710345617 | -3.096274983 | 2.14E-03 | 2.19E-02 |
| HEATR5B      | 5.705505431  | -0.287236688 | 9.222582955 | -5.080701215 | 6.54E-07 | 8.34E-05 |
| LPIN1        | 0.147951569  | -0.287100325 | 9.608781006 | -3.687734172 | 2.67E-04 | 5.30E-03 |
| STX2         | -2.492725186 | -0.286849351 | 7.381544805 | -2.821200224 | 5.10E-03 | 4.01E-02 |
| P2RY4        | -1.170393888 | -0.286684416 | 0.988806494 | -3.281859544 | 1.15E-03 | 1.43E-02 |
| RAPGEF2      | 2.372229705  | -0.286626299 | 8.655343994 | -4.293155772 | 2.36E-05 | 9.81E-04 |
| INO80        | 5.093327187  | -0.286567532 | 9.288333117 | -4.944171617 | 1.26E-06 | 1.34E-04 |
| NT5DC3       | 0.687175388  | -0.286162662 | 7.892995292 | -3.842380441 | 1.48E-04 | 3.48E-03 |
| LCAT         | -2.367152883 | -0.285434416 | 5.986187338 | -2.867933797 | 4.42E-03 | 3.63E-02 |
| TRAF1        | -1.673198986 | -0.285011039 | 7.278476299 | -3.114247345 | 2.02E-03 | 2.10E-02 |
| ZFP41        | -1.411357691 | -0.284977597 | 9.134826786 | -3.202555119 | 1.51E-03 | 1.74E-02 |
| NCS1         | -2.309828323 | -0.284868182 | 10.17708734 | -2.889029996 | 4.14E-03 | 3.49E-02 |
| TBC1D16      | -1.270708115 | -0.284856494 | 8.834952273 | -3.249063881 | 1.29E-03 | 1.54E-02 |
| LUC7L        | -0.339269898 | -0.284835065 | 9.047632468 | -3.542729131 | 4.58E-04 | 7.62E-03 |
| SSH1         | 3.142836385  | -0.284832143 | 10.26119172 | -4.485831945 | 1.03E-05 | 5.64E-04 |
| LATS2        | -0.279088038 | -0.284621104 | 8.731186851 | -3.560932909 | 4.28E-04 | 7.32E-03 |
| TBC1D5       | 3.056673674  | -0.28449026  | 10.64351461 | -4.464650954 | 1.13E-05 | 6.03E-04 |
| DCUN1D3      | -0.97210805  | -0.284401623 | 7.595181656 | -3.345805055 | 9.22E-04 | 1.23E-02 |
| FLJ10038     | -1.292420365 | -0.284216234 | 7.811923052 | -3.241924864 | 1.32E-03 | 1.57E-02 |
| HCN3         | -2.133561225 | -0.284207792 | 6.83573961  | -2.953005868 | 3.39E-03 | 3.05E-02 |
| SLC6A6       | -2.708396857 | -0.284105195 | 9.823368831 | -2.73917337  | 6.52E-03 | 4.75E-02 |
| CXorf1       | -2.58667271  | -0.284077273 | 0.632046429 | -2.785750819 | 5.67E-03 | 4.31E-02 |
| ZNF621       | 3.934485765  | -0.284042857 | 8.830521429 | -4.676521308 | 4.38E-06 | 3.20E-04 |
| LOC100129637 | -1.633395395 | -0.283638961 | 7.374316234 | -3.127821627 | 1.93E-03 | 2.04E-02 |
| CELSR2       | -2.618603609 | -0.28358474  | 12.19518101 | -2.773604426 | 5.88E-03 | 4.43E-02 |
| SLC24A1      | -0.034707277 | -0.283273701 | 8.134737175 | -3.633992718 | 3.27E-04 | 6.10E-03 |
| ARHGAP39     | -1.02985612  | -0.283111039 | 10.19003149 | -3.327299574 | 9.83E-04 | 1.29E-02 |
| STX16        | 2.47195239   | -0.282814286 | 10.64358052 | -4.31851477  | 2.12E-05 | 9.14E-04 |
| KIAA1217     | 0.842467039  | -0.282584091 | 11.8445086  | -3.885880157 | 1.25E-04 | 3.08E-03 |
| CACNB1       | -2.399300691 | -0.282273377 | 7.71681526  | -2.856038481 | 4.58E-03 | 3.72E-02 |
| KIAA0430     | 4.436268374  | -0.282160714 | 10.49447679 | -4.793983485 | 2.55E-06 | 2.16E-04 |
| TRPV1        | -2.308521519 | -0.281983766 | 7.386569156 | -2.889509219 | 4.13E-03 | 3.49E-02 |
| ZFH3         | -1.156975582 | -0.281936688 | 10.58001477 | -3.286223286 | 1.13E-03 | 1.42E-02 |
| PTPN14       | -1.2464457   | -0.280960065 | 8.706078409 | -3.257024152 | 1.25E-03 | 1.51E-02 |
| UBR1         | 3.350210365  | -0.280506494 | 8.491367532 | -4.536455729 | 8.22E-06 | 4.89E-04 |
| BRD1         | 1.809276263  | -0.280420779 | 9.387251299 | -4.147433991 | 4.36E-05 | 1.50E-03 |
| ZNF782       | -0.09521072  | -0.280051623 | 5.931671591 | -3.616030667 | 3.50E-04 | 6.34E-03 |
| LRRC37A      | -1.906680153 | -0.279931818 | 7.520825    | -3.033477625 | 2.62E-03 | 2.55E-02 |
| HTT          | 1.679461425  | -0.279100974 | 10.74033003 | -4.113181664 | 5.02E-05 | 1.61E-03 |
| ZNF594       | -2.543452993 | -0.279062338 | 6.606119481 | -2.802111829 | 5.40E-03 | 4.18E-02 |
| ANKMY1       | -1.927776121 | -0.278482792 | 7.889481981 | -3.026080111 | 2.69E-03 | 2.59E-02 |
| TAOK1        | -1.411769793 | -0.27818539  | 7.372383279 | -3.202417924 | 1.51E-03 | 1.74E-02 |

|           |              |              |             |              |          |          |
|-----------|--------------|--------------|-------------|--------------|----------|----------|
| KIAA0556  | 2.379540011  | -0.278146429 | 9.356548214 | -4.295019234 | 2.35E-05 | 9.77E-04 |
| ZNF841    | -0.831653519 | -0.2778      | 7.345370779 | -3.390422923 | 7.89E-04 | 1.11E-02 |
| C17orf86  | -1.996426618 | -0.277578571 | 7.418779545 | -3.001888509 | 2.90E-03 | 2.73E-02 |
| NEK6      | -0.735774206 | -0.277296104 | 9.861305195 | -3.420571079 | 7.09E-04 | 1.03E-02 |
| MTMR10    | 0.370501747  | -0.277246104 | 9.012684091 | -3.75226229  | 2.09E-04 | 4.43E-03 |
| KIAA1958  | -1.633958629 | -0.277114286 | 6.436034416 | -3.127629931 | 1.93E-03 | 2.04E-02 |
| CRIM1     | -1.408059712 | -0.276890584 | 10.37497484 | -3.203652873 | 1.50E-03 | 1.74E-02 |
| FAM116B   | -1.709906949 | -0.276870779 | 7.993458117 | -3.101679459 | 2.10E-03 | 2.17E-02 |
| MAP1D     | -1.556484784 | -0.276656169 | 6.072788799 | -3.153895593 | 1.77E-03 | 1.93E-02 |
| MTX3      | 0.556472599  | -0.276562013 | 8.463089123 | -3.805420042 | 1.71E-04 | 3.84E-03 |
| NIPSNAP3B | -1.601964132 | -0.276327597 | 5.019669318 | -3.138501834 | 1.86E-03 | 2.00E-02 |
| PAN2      | -1.424270138 | -0.276220455 | 9.720396266 | -3.198253746 | 1.53E-03 | 1.75E-02 |
| RFX7      | 1.01586762   | -0.276165909 | 9.075759903 | -3.93393865  | 1.03E-04 | 2.69E-03 |
| MLLT4     | -2.369091383 | -0.27613961  | 11.38213344 | -2.867217837 | 4.43E-03 | 3.63E-02 |
| DHFR1     | 0.396417113  | -0.276030844 | 7.274634578 | -3.759710845 | 2.04E-04 | 4.35E-03 |
| ZNF532    | 0.303237816  | -0.275889935 | 10.44551737 | -3.732866338 | 2.26E-04 | 4.66E-03 |
| JMJD1C    | 0.900237822  | -0.275476623 | 9.756522078 | -3.901950807 | 1.17E-04 | 2.95E-03 |
| SMG6      | 1.022307648  | -0.275320455 | 9.682920942 | -3.93571333  | 1.03E-04 | 2.68E-03 |
| PLEKHA7   | -2.217962269 | -0.275106169 | 9.256327435 | -2.922537623 | 3.73E-03 | 3.24E-02 |
| BDP1      | -0.776196612 | -0.275073701 | 9.100531331 | -3.407890787 | 7.42E-04 | 1.06E-02 |
| ATP2B1    | 0.89387597   | -0.274996753 | 10.51003344 | -3.900183998 | 1.18E-04 | 2.96E-03 |
| VPS53     | 0.416978581  | -0.274596104 | 9.641582468 | -3.765611062 | 1.99E-04 | 4.28E-03 |
| PTPN3     | -1.486363391 | -0.274253896 | 9.228023701 | -3.177493445 | 1.64E-03 | 1.83E-02 |
| NF2       | 0.366516877  | -0.274024026 | 9.871943831 | -3.751115772 | 2.10E-04 | 4.44E-03 |
| FNBP1     | -0.951698968 | -0.273997727 | 10.7584836  | -3.352322521 | 9.02E-04 | 1.21E-02 |
| BAZ2A     | 3.274002439  | -0.273811039 | 11.66500162 | -4.517909426 | 8.92E-06 | 5.14E-04 |
| SASH1     | -1.678040449 | -0.273576623 | 9.263615584 | -3.112592471 | 2.03E-03 | 2.11E-02 |
| PER1      | -2.694744003 | -0.273573052 | 9.326289448 | -2.744434989 | 6.42E-03 | 4.70E-02 |
| KLF13     | -0.333618164 | -0.27311039  | 11.02208312 | -3.544442318 | 4.55E-04 | 7.61E-03 |
| IKZF4     | 0.072858926  | -0.272879221 | 8.551116234 | -3.665727717 | 2.91E-04 | 5.63E-03 |
| SMCR8     | 3.670029826  | -0.272788961 | 9.778071753 | -4.61358086  | 5.82E-06 | 3.89E-04 |
| PTAR1     | 2.522892951  | -0.272701623 | 9.371625162 | -4.33141817  | 2.01E-05 | 8.87E-04 |
| HAFX2     | -2.392914704 | -0.272577597 | 5.011450162 | -2.858405149 | 4.55E-03 | 3.70E-02 |
| MLL5      | 0.459644595  | -0.272321753 | 11.02844432 | -3.777827568 | 1.90E-04 | 4.14E-03 |
| LPCAT2    | -1.844275757 | -0.272165909 | 8.925615097 | -3.055261791 | 2.45E-03 | 2.43E-02 |
| ZNF169    | -0.631865085 | -0.272082792 | 7.062656656 | -3.452969282 | 6.32E-04 | 9.49E-03 |
| HOOK3     | 2.170776476  | -0.272025325 | 9.863391234 | -4.241519147 | 2.94E-05 | 1.15E-03 |
| ZFYVE20   | 6.344179233  | -0.271901623 | 9.28772711  | -5.219932082 | 3.30E-07 | 5.30E-05 |
| MYO9A     | -0.628656102 | -0.271815584 | 8.256951948 | -3.453965356 | 6.30E-04 | 9.47E-03 |
| RHOBTB2   | -0.600084581 | -0.271781494 | 9.099029383 | -3.462822347 | 6.10E-04 | 9.31E-03 |
| MTMR11    | -2.201635905 | -0.271718831 | 7.663356818 | -2.92845467  | 3.66E-03 | 3.20E-02 |
| ATP7A     | -0.618155763 | -0.27165974  | 8.233492208 | -3.457222827 | 6.23E-04 | 9.39E-03 |
| TRIOBP    | 1.84551854   | -0.271397078 | 10.53321769 | -4.156951798 | 4.19E-05 | 1.46E-03 |
| SCAI      | 2.11973887   | -0.271004545 | 8.375916558 | -4.228348631 | 3.11E-05 | 1.19E-03 |
| NFIA      | -2.560477942 | -0.270967857 | 10.54377386 | -2.795677806 | 5.51E-03 | 4.24E-02 |



|              |              |              |             |              |          |          |
|--------------|--------------|--------------|-------------|--------------|----------|----------|
| SMG1         | 2.823853823  | -0.270900649 | 10.84143149 | -4.40697321  | 1.45E-05 | 7.12E-04 |
| YOD1         | 0.401527858  | -0.270750974 | 8.101691396 | -3.761178185 | 2.02E-04 | 4.34E-03 |
| CYB561D1     | -0.58898858  | -0.270697078 | 8.306513149 | -3.466256409 | 6.03E-04 | 9.25E-03 |
| BPTF         | 1.508348517  | -0.270405844 | 10.74314318 | -4.06763993  | 6.04E-05 | 1.83E-03 |
| VASH1        | -2.161070705 | -0.270302922 | 9.127184903 | -2.943107811 | 3.50E-03 | 3.11E-02 |
| TMEM170B     | -1.254790356 | -0.26989513  | 7.39317776  | -3.254288394 | 1.26E-03 | 1.52E-02 |
| PIP5K1P1     | -1.597561789 | -0.269850974 | 1.33267776  | -3.139995016 | 1.85E-03 | 1.99E-02 |
| GCC2         | 3.667627973  | -0.269582468 | 9.488176948 | -4.613005819 | 5.83E-06 | 3.89E-04 |
| VPS13C       | 1.558807609  | -0.269368506 | 9.36780211  | -4.081116816 | 5.72E-05 | 1.75E-03 |
| DLG5         | -1.695159013 | -0.269285065 | 10.92753019 | -3.106734507 | 2.07E-03 | 2.14E-02 |
| KIAA0528     | -1.411682276 | -0.269155195 | 9.714792532 | -3.20244706  | 1.51E-03 | 1.74E-02 |
| ZSCAN29      | 2.024047794  | -0.268723052 | 8.41720276  | -4.203556535 | 3.45E-05 | 1.28E-03 |
| LOC100131496 | -2.717628781 | -0.268704221 | 3.71296737  | -2.735610064 | 6.59E-03 | 4.78E-02 |
| N4BP2        | -2.533326299 | -0.267790584 | 6.474356006 | -2.805932244 | 5.34E-03 | 4.15E-02 |
| PHF2         | 2.415928228  | -0.26774513  | 9.878621591 | -4.30428432  | 2.26E-05 | 9.47E-04 |
| CCNL2        | -2.448263034 | -0.267451623 | 10.80258718 | -2.837830804 | 4.84E-03 | 3.87E-02 |
| GOLGB1       | 2.830023758  | -0.266940909 | 11.13705357 | -4.408510243 | 1.44E-05 | 7.11E-04 |
| UNC119B      | -1.490537834 | -0.266639286 | 9.942942695 | -3.176093213 | 1.64E-03 | 1.84E-02 |
| SENP7        | 1.309415391  | -0.266616883 | 8.34402987  | -4.01411373  | 7.50E-05 | 2.14E-03 |
| DENND4A      | 2.491223512  | -0.266526948 | 7.991670292 | -4.323400195 | 2.08E-05 | 9.07E-04 |
| LOC285740    | -0.266400223 | -0.266525325 | 0.75465487  | -3.564759816 | 4.22E-04 | 7.22E-03 |
| SH3BP2       | -2.065876488 | -0.266462013 | 10.82387029 | -2.977227083 | 3.14E-03 | 2.88E-02 |
| ATXN1        | -1.11109551  | -0.266236688 | 9.630438799 | -3.301103335 | 1.08E-03 | 1.37E-02 |
| RGS12        | -0.799101972 | -0.266090909 | 9.107659091 | -3.400686098 | 7.61E-04 | 1.08E-02 |
| MNT          | 5.041090217  | -0.265200325 | 10.2196336  | -4.932373972 | 1.33E-06 | 1.39E-04 |
| BAZ2B        | -1.693666482 | -0.264702922 | 9.346125162 | -3.107245662 | 2.06E-03 | 2.14E-02 |
| MECP2        | 2.799976368  | -0.264622078 | 10.63725325 | -4.401020503 | 1.49E-05 | 7.23E-04 |
| C22orf43     | -2.594191223 | -0.264450649 | 0.970658442 | -2.782895335 | 5.72E-03 | 4.33E-02 |
| XPC          | 5.304874986  | -0.2642      | 9.509218831 | -4.991707728 | 1.00E-06 | 1.15E-04 |
| SKI          | -0.948366338 | -0.263790584 | 11.75083198 | -3.353385653 | 8.98E-04 | 1.21E-02 |
| SNAPC4       | 0.090431222  | -0.263647403 | 9.138634091 | -3.670888201 | 2.85E-04 | 5.56E-03 |
| ZNF236       | -0.087692256 | -0.263368506 | 8.118451461 | -3.618267162 | 3.47E-04 | 6.31E-03 |
| NEK9         | 1.422677775  | -0.262551948 | 10.06409675 | -4.044666593 | 6.63E-05 | 1.95E-03 |
| BBC3         | -1.583713292 | -0.262416558 | 6.998967695 | -3.14468781  | 1.83E-03 | 1.97E-02 |
| RANBP10      | 2.760494186  | -0.262365584 | 9.30586526  | -4.391161972 | 1.55E-05 | 7.46E-04 |
| KIAA0232     | 0.88694488   | -0.262238636 | 9.642933279 | -3.898258279 | 1.19E-04 | 2.98E-03 |
| NCRNA00169   | -2.729850624 | -0.262023701 | 1.841456981 | -2.730885919 | 6.68E-03 | 4.82E-02 |
| LOC151162    | -1.169138239 | -0.261986364 | 10.12344838 | -3.28226812  | 1.15E-03 | 1.43E-02 |
| AGAP5        | -2.722565854 | -0.261817532 | 5.55973474  | -2.733702657 | 6.63E-03 | 4.80E-02 |
| TMX3         | 0.99274323   | -0.261130844 | 8.992036526 | -3.927560304 | 1.06E-04 | 2.74E-03 |
| TRIM52       | -0.973800063 | -0.261085714 | 7.095377922 | -3.345264197 | 9.24E-04 | 1.23E-02 |
| MTMR3        | -0.013204229 | -0.26099513  | 10.01096412 | -3.640356933 | 3.19E-04 | 6.03E-03 |
| TSGA10       | -2.70803374  | -0.260856169 | 6.86796737  | -2.739313435 | 6.52E-03 | 4.75E-02 |
| DFNB31       | -2.569558919 | -0.260700974 | 8.090961201 | -2.792240196 | 5.56E-03 | 4.27E-02 |
| ZNF37A       | -0.852632652 | -0.260566883 | 8.769521104 | -3.383793152 | 8.08E-04 | 1.13E-02 |

|              |              |              |             |              |          |          |
|--------------|--------------|--------------|-------------|--------------|----------|----------|
| PLEKHM3      | -0.626959393 | -0.260499026 | 8.516881656 | -3.45449191  | 6.29E-04 | 9.46E-03 |
| GGA1         | 3.631734251  | -0.26022987  | 9.978576623 | -4.604404892 | 6.06E-06 | 3.96E-04 |
| NUMA1        | -0.314686234 | -0.259958766 | 13.13920179 | -3.550175542 | 4.45E-04 | 7.51E-03 |
| PTK2B        | -2.524710893 | -0.259859416 | 8.962813149 | -2.809178629 | 5.29E-03 | 4.12E-02 |
| SMYD4        | 0.041584478  | -0.259791558 | 7.820403571 | -3.656526849 | 3.01E-04 | 5.73E-03 |
| LIMD1        | 3.12543454   | -0.259573377 | 9.452868506 | -4.481561173 | 1.05E-05 | 5.72E-04 |
| RABL2A       | -1.505582676 | -0.259248701 | 8.476166558 | -3.171041935 | 1.67E-03 | 1.85E-02 |
| HIVEP1       | -0.163180995 | -0.25910974  | 9.651395779 | -3.595753949 | 3.77E-04 | 6.69E-03 |
| ZFC3H1       | 1.678437907  | -0.258577597 | 9.177415747 | -4.112910593 | 5.02E-05 | 1.61E-03 |
| SSH2         | 0.094461459  | -0.258572727 | 8.455507143 | -3.672070834 | 2.84E-04 | 5.54E-03 |
| REL          | -1.074135049 | -0.258497727 | 5.82720763  | -3.313045355 | 1.03E-03 | 1.33E-02 |
| C22orf30     | 0.564956269  | -0.258392532 | 9.867536201 | -3.807828935 | 1.69E-04 | 3.81E-03 |
| MZF1         | -1.872163655 | -0.258325974 | 9.034214935 | -3.045544757 | 2.52E-03 | 2.47E-02 |
| ANKRD28      | 1.494998497  | -0.258106818 | 10.23479334 | -4.064067652 | 6.13E-05 | 1.85E-03 |
| SBF2         | 1.609342095  | -0.257860065 | 9.317388149 | -4.094574099 | 5.41E-05 | 1.69E-03 |
| EML5         | -2.113443333 | -0.257844805 | 5.337923052 | -2.960224632 | 3.31E-03 | 3.00E-02 |
| AGAP6        | -2.525560305 | -0.257808117 | 7.209493344 | -2.808858719 | 5.29E-03 | 4.12E-02 |
| TAS2R19      | -2.568371444 | -0.257376299 | 0.947033279 | -2.792689943 | 5.56E-03 | 4.27E-02 |
| INPP5F       | 0.751318223  | -0.257367532 | 8.628455195 | -3.860401611 | 1.38E-04 | 3.29E-03 |
| ADCY6        | -1.079816509 | -0.257351948 | 9.429723377 | -3.311212263 | 1.04E-03 | 1.33E-02 |
| AKNA         | -2.122843663 | -0.257250974 | 9.52022776  | -2.956853645 | 3.35E-03 | 3.02E-02 |
| ATF7         | 3.486095175  | -0.256866883 | 10.53039838 | -4.569362684 | 7.10E-06 | 4.43E-04 |
| ZNF268       | -0.62694802  | -0.256751623 | 8.147574188 | -3.454495439 | 6.29E-04 | 9.46E-03 |
| LOC642852    | -2.690313658 | -0.256740584 | 8.337311526 | -2.746140323 | 6.39E-03 | 4.68E-02 |
| RC3H2        | 1.438646763  | -0.256645455 | 8.521828571 | -4.048957657 | 6.52E-05 | 1.93E-03 |
| RAD54L2      | -0.726326144 | -0.25622013  | 8.107747078 | -3.423528626 | 7.02E-04 | 1.02E-02 |
| ANKFY1       | 2.089597166  | -0.255828247 | 10.66118912 | -4.220553309 | 3.21E-05 | 1.22E-03 |
| MTMR15       | 0.515393011  | -0.255277597 | 8.514835227 | -3.79373609  | 1.79E-04 | 3.96E-03 |
| ATG2B        | 1.017086249  | -0.255121429 | 9.240150974 | -3.934274523 | 1.03E-04 | 2.69E-03 |
| RECK         | -2.767331054 | -0.255107792 | 7.102072727 | -2.716349782 | 6.97E-03 | 4.98E-02 |
| CCNT2        | 1.670137685  | -0.255068506 | 9.262581331 | -4.110711756 | 5.07E-05 | 1.61E-03 |
| TMED10P1     | -1.932476909 | -0.255004545 | 5.713810065 | -3.024429415 | 2.70E-03 | 2.60E-02 |
| ABL1         | -0.080712645 | -0.25491039  | 11.04360195 | -3.620342235 | 3.44E-04 | 6.28E-03 |
| ZNF550       | -0.982212219 | -0.254823052 | 7.794439123 | -3.342574014 | 9.33E-04 | 1.24E-02 |
| YPEL1        | -2.208094819 | -0.254778247 | 8.350671916 | -2.926115163 | 3.69E-03 | 3.22E-02 |
| ZCCHC14      | -1.49142807  | -0.254741883 | 9.600905682 | -3.175794527 | 1.65E-03 | 1.84E-02 |
| LOC100129550 | -1.571086136 | -0.254676623 | 7.613387013 | -3.148961029 | 1.80E-03 | 1.95E-02 |
| SYNGAP1      | -2.739237099 | -0.254373052 | 10.06112451 | -2.727252454 | 6.75E-03 | 4.86E-02 |
| PRPF8        | 0.311052988  | -0.253849675 | 12.78982516 | -3.735124594 | 2.24E-04 | 4.64E-03 |
| L3MBTL3      | -1.908498387 | -0.253770779 | 7.346218506 | -3.03284071  | 2.63E-03 | 2.55E-02 |
| C19orf34     | -1.273834883 | -0.253377597 | 0.715583279 | -3.248036696 | 1.29E-03 | 1.55E-02 |
| KIAA1147     | -0.739837709 | -0.253362338 | 10.15159091 | -3.419298345 | 7.13E-04 | 1.03E-02 |
| CDC42EP3     | -1.454600641 | -0.253089935 | 9.425713474 | -3.188128796 | 1.58E-03 | 1.79E-02 |
| DENND4C      | 0.263740861  | -0.252955195 | 9.634960714 | -3.7214343   | 2.36E-04 | 4.81E-03 |
| NCOR2        | -1.676394551 | -0.252944805 | 12.81868929 | -3.113155152 | 2.03E-03 | 2.11E-02 |

|           |              |              |             |              |          |          |
|-----------|--------------|--------------|-------------|--------------|----------|----------|
| ZNF7      | -0.054809515 | -0.252836364 | 9.56519026  | -3.628033863 | 3.34E-04 | 6.20E-03 |
| ITPKB     | -1.999512032 | -0.252729545 | 10.26578068 | -3.000796939 | 2.91E-03 | 2.73E-02 |
| ZNF192    | -2.736557724 | -0.252608117 | 9.263111526 | -2.728290099 | 6.73E-03 | 4.85E-02 |
| CEP170    | -1.177365551 | -0.252496753 | 9.172075649 | -3.279590171 | 1.16E-03 | 1.43E-02 |
| EPN2      | 2.621133781  | -0.252394156 | 10.17997955 | -4.356207766 | 1.81E-05 | 8.35E-04 |
| UBR4      | 2.120758552  | -0.252169156 | 11.79807776 | -4.228612121 | 3.11E-05 | 1.19E-03 |
| LZTR1     | -0.227470344 | -0.252105844 | 9.662623701 | -3.576478412 | 4.04E-04 | 7.00E-03 |
| RBM9      | 0.942670169  | -0.251679545 | 10.65860308 | -3.913716674 | 1.12E-04 | 2.86E-03 |
| DYNC1LI2  | 2.525618751  | -0.251648377 | 10.61087776 | -4.332107669 | 2.00E-05 | 8.87E-04 |
| RPS10P7   | -2.723989218 | -0.251415909 | 5.937016721 | -2.733152515 | 6.64E-03 | 4.80E-02 |
| DISP1     | -0.120365176 | -0.251242208 | 7.886032792 | -3.608538819 | 3.59E-04 | 6.47E-03 |
| ZHX3      | -2.319938373 | -0.251228896 | 8.735414773 | -2.885319958 | 4.19E-03 | 3.52E-02 |
| C22orf46  | -1.689045852 | -0.251039286 | 7.734012175 | -3.108827615 | 2.05E-03 | 2.13E-02 |
| NCOR1     | 1.726742159  | -0.250994805 | 10.84974091 | -4.125686274 | 4.76E-05 | 1.58E-03 |
| ASH1L     | 2.536561572  | -0.250847403 | 10.78045097 | -4.334874714 | 1.98E-05 | 8.85E-04 |
| CCDC55    | 1.899173017  | -0.250633117 | 8.738139935 | -4.171006839 | 3.95E-05 | 1.42E-03 |
| SGK269    | -0.437564453 | -0.250411039 | 9.889254221 | -3.512810735 | 5.10E-04 | 8.23E-03 |
| CTDSPL    | -0.105741313 | -0.250130519 | 10.44618279 | -3.612896031 | 3.54E-04 | 6.40E-03 |
| FAM179B   | 0.509466235  | -0.250028247 | 8.797781331 | -3.792047687 | 1.80E-04 | 3.97E-03 |
| ARID5B    | -1.994850646 | -0.24998539  | 10.8580138  | -3.002445919 | 2.90E-03 | 2.72E-02 |
| ING5      | -1.473016512 | -0.249932468 | 8.811192857 | -3.181966521 | 1.61E-03 | 1.81E-02 |
| ZNF512B   | -0.989149099 | -0.249887662 | 10.53648864 | -3.34035411  | 9.40E-04 | 1.24E-02 |
| FLNB      | -1.637356319 | -0.249757468 | 12.12950633 | -3.1264733   | 1.94E-03 | 2.05E-02 |
| ZNF141    | -1.467897291 | -0.249726623 | 6.490400325 | -3.18368062  | 1.60E-03 | 1.80E-02 |
| METT10D   | 0.83558358   | -0.249451948 | 9.328321429 | -3.883961317 | 1.26E-04 | 3.08E-03 |
| WDR6      | -1.206193504 | -0.249245779 | 11.60745308 | -3.270190724 | 1.20E-03 | 1.47E-02 |
| VPS13D    | -1.222974416 | -0.249244481 | 10.07187192 | -3.264707662 | 1.22E-03 | 1.49E-02 |
| USP20     | 2.570748927  | -0.249225649 | 9.25155276  | -4.343509462 | 1.91E-05 | 8.66E-04 |
| ANKRD11   | 0.19338969   | -0.249077597 | 11.34170341 | -3.700992148 | 2.54E-04 | 5.11E-03 |
| ZNF707    | -2.391587482 | -0.248936364 | 8.418418182 | -2.85889679  | 4.54E-03 | 3.70E-02 |
| RNF38     | 0.042299867  | -0.248904221 | 10.10756737 | -3.656737551 | 3.00E-04 | 5.73E-03 |
| PIP4K2B   | 1.313449623  | -0.248821429 | 10.76785357 | -4.015205554 | 7.47E-05 | 2.14E-03 |
| RAB11FIP3 | -0.930319504 | -0.248818831 | 9.577926948 | -3.359137297 | 8.80E-04 | 1.19E-02 |
| DOCK1     | -2.204970983 | -0.24879513  | 9.864129058 | -2.927246879 | 3.68E-03 | 3.21E-02 |
| HPS4      | 1.629709526  | -0.248418506 | 9.32895763  | -4.09998677  | 5.29E-05 | 1.66E-03 |
| VPS13B    | -0.183786059 | -0.248292532 | 9.497342045 | -3.589586375 | 3.85E-04 | 6.79E-03 |
| GAPVD1    | 3.511902723  | -0.248227273 | 9.628742857 | -4.575589205 | 6.90E-06 | 4.35E-04 |
| EXTL3     | -2.121514947 | -0.248084416 | 10.00985065 | -2.957330346 | 3.34E-03 | 3.02E-02 |
| SH3D19    | -1.923569487 | -0.247965584 | 9.628383442 | -3.027556566 | 2.67E-03 | 2.58E-02 |
| ZNF276    | -2.148278892 | -0.247762338 | 8.461818182 | -2.947714272 | 3.45E-03 | 3.08E-02 |
| DEPDC5    | 0.671223301  | -0.247547727 | 8.286211201 | -3.837886755 | 1.51E-04 | 3.54E-03 |
| HEXDC     | -2.190970507 | -0.247489935 | 8.459698539 | -2.932313967 | 3.62E-03 | 3.18E-02 |
| APBB2     | -2.296404304 | -0.247252273 | 9.502610877 | -2.893949197 | 4.08E-03 | 3.45E-02 |
| ARL13A    | 1.192531051  | -0.247181818 | 0.630864935 | -3.982363591 | 8.52E-05 | 2.33E-03 |
| MCPH1     | -0.652244875 | -0.246193506 | 8.307414286 | -3.446637162 | 6.47E-04 | 9.65E-03 |

|           |              |              |             |              |          |          |
|-----------|--------------|--------------|-------------|--------------|----------|----------|
| ASXL2     | -0.379167983 | -0.245112013 | 9.481283604 | -3.530613262 | 4.78E-04 | 7.88E-03 |
| KIAA0649  | -0.641185079 | -0.24505487  | 9.614253084 | -3.450074837 | 6.39E-04 | 9.57E-03 |
| SEPSECS   | -0.151691863 | -0.244989935 | 7.776354383 | -3.599188706 | 3.72E-04 | 6.65E-03 |
| GTPBP1    | 2.009317629  | -0.244651299 | 10.38500162 | -4.199728647 | 3.51E-05 | 1.29E-03 |
| DDX26B    | -2.208724555 | -0.244586364 | 7.369382792 | -2.925886969 | 3.69E-03 | 3.22E-02 |
| CYTSA     | -0.620532109 | -0.244582792 | 10.03263328 | -3.456485872 | 6.24E-04 | 9.41E-03 |
| SCRIB     | -2.450540624 | -0.244478571 | 12.24024578 | -2.836981141 | 4.86E-03 | 3.87E-02 |
| C22orf29  | -2.570676462 | -0.244386688 | 9.856351461 | -2.791816872 | 5.57E-03 | 4.27E-02 |
| LRSAM1    | 1.246722958  | -0.244270779 | 8.857193831 | -3.99711228  | 8.04E-05 | 2.24E-03 |
| WDFY3     | 1.037857623  | -0.244165584 | 9.726679545 | -3.939995471 | 1.01E-04 | 2.65E-03 |
| FAM119B   | 0.769977769  | -0.24405974  | 8.167266234 | -3.86562981  | 1.35E-04 | 3.25E-03 |
| CAMSAP1   | 1.150129922  | -0.243599675 | 9.668371591 | -3.970789535 | 8.93E-05 | 2.42E-03 |
| LOC440944 | -2.330062651 | -0.243519805 | 8.470534253 | -2.881600174 | 4.24E-03 | 3.54E-02 |
| ARHGEF10L | -2.661474859 | -0.243338961 | 8.989942208 | -2.757216484 | 6.18E-03 | 4.57E-02 |
| DNAJC27   | 1.016859751  | -0.243192208 | 7.122284416 | -3.934212099 | 1.03E-04 | 2.69E-03 |
| LDHAL6B   | -2.214850161 | -0.243086688 | 1.179747565 | -2.923666395 | 3.72E-03 | 3.23E-02 |
| IKBKB     | -0.750818666 | -0.243028571 | 9.791476623 | -3.415856796 | 7.21E-04 | 1.04E-02 |
| CLASP1    | 0.084960866  | -0.242770455 | 10.37768166 | -3.669282424 | 2.87E-04 | 5.58E-03 |
| C3orf48   | -0.783669598 | -0.242687662 | 0.823028247 | -3.405541771 | 7.48E-04 | 1.07E-02 |
| SNTB2     | -0.177937654 | -0.242518831 | 9.597970455 | -3.591337925 | 3.83E-04 | 6.75E-03 |
| SNX29     | -1.46721503  | -0.242377597 | 9.014854058 | -3.183909001 | 1.60E-03 | 1.80E-02 |
| MMP19     | -1.747654717 | -0.242301623 | 8.775321916 | -3.088705601 | 2.19E-03 | 2.24E-02 |
| RANBP2    | 1.339524311  | -0.242099026 | 10.57104205 | -4.022255995 | 7.26E-05 | 2.09E-03 |
| TSTD2     | 1.355600411  | -0.241914935 | 8.937752922 | -4.026597361 | 7.14E-05 | 2.07E-03 |
| ZNF33A    | -1.066962108 | -0.241708117 | 10.0713349  | -3.315358322 | 1.02E-03 | 1.32E-02 |
| RG9MTD3   | -0.151422139 | -0.241706494 | 7.044845455 | -3.599269306 | 3.72E-04 | 6.65E-03 |
| ANKRD26   | -2.337861044 | -0.241620455 | 7.46635276  | -2.878731849 | 4.27E-03 | 3.57E-02 |
| SCAPER    | -0.262154033 | -0.241530519 | 8.051330844 | -3.566039713 | 4.20E-04 | 7.21E-03 |
| ZBTB40    | -0.338533376 | -0.241351948 | 9.336499351 | -3.542952433 | 4.57E-04 | 7.62E-03 |
| YPEL2     | -2.299529171 | -0.241351299 | 9.125148377 | -2.892804803 | 4.09E-03 | 3.46E-02 |
| ZBTB4     | -1.470668344 | -0.240998701 | 11.12346039 | -3.182752879 | 1.61E-03 | 1.81E-02 |
| THOC2     | 4.384085832  | -0.240996429 | 10.05241607 | -4.781883572 | 2.70E-06 | 2.25E-04 |
| FGD4      | -2.704914062 | -0.240953896 | 8.823689935 | -2.740516503 | 6.49E-03 | 4.74E-02 |
| CLUAP1    | -0.92292546  | -0.240829221 | 8.62384513  | -3.361491194 | 8.73E-04 | 1.19E-02 |
| ZKSCAN2   | -2.642158045 | -0.240445455 | 7.515005844 | -2.76461194  | 6.04E-03 | 4.52E-02 |
| LRBA      | -1.686317519 | -0.240438312 | 10.2591737  | -3.109761353 | 2.05E-03 | 2.12E-02 |
| UBN1      | 0.618757281  | -0.240269481 | 10.57741851 | -3.823073408 | 1.60E-04 | 3.68E-03 |
| KIAA0467  | -1.161245092 | -0.240263636 | 10.29204286 | -3.284835391 | 1.14E-03 | 1.42E-02 |
| CLK1      | -1.202998075 | -0.240019805 | 9.912550487 | -3.271233842 | 1.19E-03 | 1.47E-02 |
| C11orf95  | -2.336362606 | -0.239207468 | 9.292933929 | -2.879283199 | 4.27E-03 | 3.56E-02 |
| PRR12     | -1.148329401 | -0.238687013 | 10.97607013 | -3.289032242 | 1.12E-03 | 1.41E-02 |
| PRO0611   | -2.265641266 | -0.238636364 | 0.958113636 | -2.905192548 | 3.94E-03 | 3.37E-02 |
| MICALL1   | -1.668816083 | -0.238458442 | 9.690262987 | -3.115744766 | 2.01E-03 | 2.10E-02 |
| DIP2A     | -1.859701526 | -0.238361364 | 9.277225812 | -3.049890554 | 2.49E-03 | 2.45E-02 |
| ZNF33B    | -2.253761184 | -0.23829513  | 9.189331006 | -2.909523521 | 3.88E-03 | 3.34E-02 |

|           |              |              |             |              |          |          |
|-----------|--------------|--------------|-------------|--------------|----------|----------|
| PHLPP2    | -2.755643495 | -0.238055195 | 7.480932792 | -2.720890526 | 6.88E-03 | 4.94E-02 |
| GOLGA2    | -0.790178272 | -0.237825649 | 10.37204367 | -3.40349465  | 7.54E-04 | 1.07E-02 |
| TET3      | -2.569765875 | -0.237755519 | 9.825043669 | -2.792161806 | 5.56E-03 | 4.27E-02 |
| DMXL2     | -1.958690053 | -0.237683766 | 8.478900325 | -3.015209012 | 2.78E-03 | 2.65E-02 |
| RGPD6     | -2.432118829 | -0.237659416 | 8.761531331 | -2.843846564 | 4.76E-03 | 3.82E-02 |
| TRIO      | -1.969437427 | -0.237316234 | 10.73355422 | -3.011420978 | 2.82E-03 | 2.67E-02 |
| AFG3L1    | -2.446480474 | -0.23715974  | 7.447765584 | -2.838495627 | 4.83E-03 | 3.87E-02 |
| NIN       | 0.431546675  | -0.237001623 | 8.850142045 | -3.769786369 | 1.96E-04 | 4.24E-03 |
| STAT5B    | 0.997639528  | -0.236848377 | 9.642340747 | -3.928911617 | 1.05E-04 | 2.73E-03 |
| RAPGEF1   | -0.379099694 | -0.236787338 | 10.81553425 | -3.530634032 | 4.78E-04 | 7.88E-03 |
| SHANK3    | -1.973246066 | -0.236472078 | 9.041510065 | -3.010077504 | 2.83E-03 | 2.67E-02 |
| HIPK1     | -0.686740356 | -0.236416234 | 10.47254058 | -3.435894673 | 6.72E-04 | 9.89E-03 |
| FOXJ2     | -0.921997445 | -0.23625974  | 9.849512338 | -3.36178652  | 8.72E-04 | 1.19E-02 |
| FBXW8     | -1.356193772 | -0.236114935 | 9.377433442 | -3.220870861 | 1.42E-03 | 1.66E-02 |
| ZNF264    | -1.324822264 | -0.236058117 | 9.480837175 | -3.231243755 | 1.37E-03 | 1.62E-02 |
| REST      | -1.133079533 | -0.235939286 | 9.437823864 | -3.293981165 | 1.10E-03 | 1.39E-02 |
| DDHD1     | -1.075928229 | -0.235882792 | 8.250317695 | -3.312466897 | 1.04E-03 | 1.33E-02 |
| USP36     | 0.145864548  | -0.235730844 | 10.35764886 | -3.687124175 | 2.68E-04 | 5.31E-03 |
| KIF1B     | -2.40753724  | -0.235683442 | 10.9735336  | -2.852983245 | 4.63E-03 | 3.75E-02 |
| C16orf48  | -2.23792664  | -0.235484416 | 7.682930519 | -2.915286673 | 3.81E-03 | 3.29E-02 |
| TSC1      | -0.078536245 | -0.235401623 | 9.365876461 | -3.620989066 | 3.43E-04 | 6.28E-03 |
| POU5F2    | -1.571232516 | -0.235388312 | 0.735400649 | -3.148911522 | 1.80E-03 | 1.95E-02 |
| SELO      | -1.627091106 | -0.235166883 | 8.463036039 | -3.129966532 | 1.92E-03 | 2.03E-02 |
| ZNF252    | -1.799402829 | -0.235158117 | 9.959494968 | -3.070836335 | 2.33E-03 | 2.33E-02 |
| HMBOX1    | -2.729198681 | -0.235124351 | 6.653079383 | -2.731138113 | 6.68E-03 | 4.82E-02 |
| ANKRD57   | -1.109251089 | -0.234842208 | 8.559040584 | -3.301700223 | 1.07E-03 | 1.36E-02 |
| HGSNAT    | 0.35871321   | -0.23463961  | 11.16578084 | -3.748869594 | 2.12E-04 | 4.46E-03 |
| KIF13A    | -2.529534803 | -0.234582143 | 9.300088149 | -2.807361362 | 5.31E-03 | 4.14E-02 |
| C17orf85  | 0.125274331  | -0.234469481 | 8.950174351 | -3.681101096 | 2.74E-04 | 5.41E-03 |
| WASH2P    | -2.330716898 | -0.234363312 | 8.025678084 | -2.881359639 | 4.24E-03 | 3.55E-02 |
| RBM6      | -0.256033921 | -0.234185065 | 9.863494481 | -3.56788371  | 4.17E-04 | 7.17E-03 |
| CHD1      | -0.7273719   | -0.234081494 | 8.75557955  | -3.423201387 | 7.03E-04 | 1.02E-02 |
| TSC2      | -1.653757996 | -0.233908442 | 11.60078149 | -3.120884244 | 1.97E-03 | 2.07E-02 |
| INO80D    | -0.039825936 | -0.233464286 | 8.770813961 | -3.632476256 | 3.29E-04 | 6.11E-03 |
| ZNF641    | -1.034464048 | -0.233393831 | 7.823518019 | -3.325818839 | 9.89E-04 | 1.29E-02 |
| C17orf103 | -2.765397945 | -0.233336688 | 8.420030357 | -2.717101314 | 6.96E-03 | 4.97E-02 |
| MBTD1     | -1.120632671 | -0.233221104 | 9.111695292 | -3.298015334 | 1.09E-03 | 1.38E-02 |
| THRA      | -2.414136823 | -0.233178571 | 9.785523052 | -2.850532982 | 4.66E-03 | 3.77E-02 |
| RGPD4     | 0.852691994  | -0.232936039 | 5.955435877 | -3.888728896 | 1.24E-04 | 3.06E-03 |
| SETD1B    | -1.716715924 | -0.232916883 | 10.82382597 | -3.099342987 | 2.12E-03 | 2.18E-02 |
| DDHD2     | -2.188592668 | -0.23275     | 9.432789286 | -2.933173739 | 3.61E-03 | 3.17E-02 |
| MGA       | -0.225122565 | -0.232723701 | 9.9612875   | -3.57718401  | 4.03E-04 | 6.99E-03 |
| IREB2     | 1.840630827  | -0.232671104 | 9.937121591 | -4.155669338 | 4.21E-05 | 1.46E-03 |
| USP22     | 0.664899809  | -0.232423701 | 11.97678555 | -3.836104115 | 1.52E-04 | 3.55E-03 |
| CLDN20    | -2.617496419 | -0.232411039 | 0.953676299 | -2.774026442 | 5.88E-03 | 4.42E-02 |

|            |              |              |             |              |          |          |
|------------|--------------|--------------|-------------|--------------|----------|----------|
| WDR37      | -1.662160642 | -0.232337662 | 8.850080519 | -3.118017314 | 1.99E-03 | 2.09E-02 |
| EP300      | -0.337659431 | -0.231836039 | 11.2467138  | -3.543217383 | 4.57E-04 | 7.62E-03 |
| KDSR       | -0.551846538 | -0.231641558 | 9.974650649 | -3.477728614 | 5.79E-04 | 8.99E-03 |
| ARID4A     | 1.583244365  | -0.231519805 | 8.722340747 | -4.087629241 | 5.57E-05 | 1.72E-03 |
| ZNF605     | -2.265187224 | -0.231069481 | 8.738573701 | -2.905358184 | 3.93E-03 | 3.37E-02 |
| TANC1      | -1.092117432 | -0.231057468 | 9.869401786 | -3.307240204 | 1.05E-03 | 1.35E-02 |
| ZNF638     | 1.557145949  | -0.230824351 | 10.29974821 | -4.080673645 | 5.73E-05 | 1.75E-03 |
| SPTBN1     | -2.017720695 | -0.230639935 | 11.89998977 | -2.994347379 | 2.97E-03 | 2.77E-02 |
| SEC14L1    | -2.117398806 | -0.230525    | 10.48696218 | -2.958806629 | 3.33E-03 | 3.01E-02 |
| SCAND2     | -1.090295064 | -0.230376623 | 8.109972727 | -3.30782894  | 1.05E-03 | 1.34E-02 |
| UBL3       | -1.449891582 | -0.230371429 | 9.640956494 | -3.189702745 | 1.57E-03 | 1.78E-02 |
| ZNF251     | -1.319484369 | -0.230268831 | 9.389350649 | -3.233005625 | 1.36E-03 | 1.61E-02 |
| ACVR2A     | -1.450726021 | -0.230080519 | 8.299250649 | -3.189423896 | 1.57E-03 | 1.78E-02 |
| TMOD3      | -0.124348004 | -0.230018506 | 10.38719464 | -3.607351291 | 3.61E-04 | 6.48E-03 |
| ZDHHC17    | -0.339230196 | -0.229788312 | 8.479344156 | -3.542741169 | 4.57E-04 | 7.62E-03 |
| RBM33      | 2.075934062  | -0.229744805 | 10.12078474 | -4.217015516 | 3.26E-05 | 1.23E-03 |
| ZBTB6      | 0.35107003   | -0.229485065 | 8.525027597 | -3.746668423 | 2.14E-04 | 4.49E-03 |
| PPP3CA     | -2.185032235 | -0.22884026  | 9.694119481 | -2.934460667 | 3.59E-03 | 3.17E-02 |
| BIRC6      | 0.741746411  | -0.228446104 | 10.62293019 | -3.857717209 | 1.39E-04 | 3.31E-03 |
| GTF2IRD2P1 | -2.650633425 | -0.228093831 | 7.138514773 | -2.761369451 | 6.10E-03 | 4.54E-02 |
| KCTD7      | -2.588489179 | -0.228063961 | 8.001203084 | -2.78506119  | 5.68E-03 | 4.32E-02 |
| LOC284900  | -2.655974897 | -0.227720779 | 7.107466234 | -2.759324066 | 6.14E-03 | 4.56E-02 |
| RBM5       | 0.356052439  | -0.227655519 | 10.53514562 | -3.748103448 | 2.13E-04 | 4.47E-03 |
| TBC1D2B    | -1.718556534 | -0.227618506 | 9.635066721 | -3.098711105 | 2.12E-03 | 2.18E-02 |
| C21orf84   | -2.055655056 | -0.227601299 | 0.537275325 | -2.980868737 | 3.10E-03 | 2.86E-02 |
| SEC16A     | -0.873570663 | -0.227452273 | 11.52585114 | -3.377164365 | 8.27E-04 | 1.15E-02 |
| ZNF324B    | -2.35995315  | -0.227425974 | 6.724246753 | -2.870591445 | 4.38E-03 | 3.62E-02 |
| MTR        | -1.636083248 | -0.227332143 | 9.883983929 | -3.126906722 | 1.94E-03 | 2.05E-02 |
| GOLGA4     | -1.225275403 | -0.227129221 | 10.13363994 | -3.26395516  | 1.22E-03 | 1.49E-02 |
| ZNF623     | -1.456233373 | -0.226485714 | 9.70173961  | -3.187582904 | 1.58E-03 | 1.79E-02 |
| PRDM10     | 1.27979753   | -0.226103247 | 7.980815909 | -4.006089783 | 7.75E-05 | 2.19E-03 |
| RABL2B     | -2.681442257 | -0.225857143 | 8.67227987  | -2.749552091 | 6.32E-03 | 4.65E-02 |
| PCMTD1     | -1.51823417  | -0.225725    | 10.11116088 | -3.166788392 | 1.70E-03 | 1.87E-02 |
| PI4KA      | -1.425345735 | -0.225558766 | 10.58468166 | -3.197895202 | 1.53E-03 | 1.75E-02 |
| TGFBRAP1   | -0.601860659 | -0.225532143 | 8.404496266 | -3.462272383 | 6.12E-04 | 9.31E-03 |
| VPS13A     | -1.145913666 | -0.225267857 | 8.214058929 | -3.289816664 | 1.12E-03 | 1.40E-02 |
| HELZ       | 0.900366282  | -0.225161688 | 10.07160942 | -3.901986475 | 1.17E-04 | 2.95E-03 |
| ZC3H4      | 3.954710538  | -0.225097078 | 10.43554172 | -4.6813047   | 4.28E-06 | 3.15E-04 |
| ZNF160     | -1.679641571 | -0.225048377 | 8.887681656 | -3.112045006 | 2.03E-03 | 2.11E-02 |
| KIAA0195   | -1.514769109 | -0.225024026 | 10.96414383 | -3.167953906 | 1.69E-03 | 1.87E-02 |
| ZNF407     | -1.432156161 | -0.224905844 | 7.649280195 | -3.195624109 | 1.54E-03 | 1.76E-02 |
| ZNF286A    | -2.595873503 | -0.224863961 | 8.027668669 | -2.782256035 | 5.73E-03 | 4.34E-02 |
| OXR1       | -1.814998006 | -0.224707468 | 9.85685276  | -3.065431966 | 2.37E-03 | 2.37E-02 |
| C11orf61   | -2.197754778 | -0.224647727 | 7.969487175 | -2.929859619 | 3.65E-03 | 3.19E-02 |
| ZNF721     | -1.498407664 | -0.224602922 | 8.650455682 | -3.173451869 | 1.66E-03 | 1.85E-02 |

|          |              |              |             |              |          |          |
|----------|--------------|--------------|-------------|--------------|----------|----------|
| ZFYVE26  | -1.447081907 | -0.224564286 | 9.593947727 | -3.190641501 | 1.57E-03 | 1.78E-02 |
| TUBGCP4  | 0.096438894  | -0.224183117 | 8.326321429 | -3.672650965 | 2.83E-04 | 5.54E-03 |
| JRKL     | -2.140336234 | -0.223988636 | 8.339275812 | -2.95057109  | 3.42E-03 | 3.07E-02 |
| POLI     | -1.936522626 | -0.223955519 | 8.047903409 | -3.023008071 | 2.71E-03 | 2.60E-02 |
| ABL2     | 0.186770592  | -0.223646104 | 9.198795779 | -3.699063518 | 2.56E-04 | 5.14E-03 |
| FOXN3    | -1.963304272 | -0.223598701 | 10.01015649 | -3.013583227 | 2.80E-03 | 2.66E-02 |
| RNF19A   | -2.656098949 | -0.22335974  | 10.34175519 | -2.759276546 | 6.14E-03 | 4.56E-02 |
| USPL1    | -0.070417536 | -0.223138636 | 8.54620276  | -3.623401035 | 3.40E-04 | 6.26E-03 |
| DDX42    | 1.670308996  | -0.223100325 | 11.08389205 | -4.110757149 | 5.07E-05 | 1.61E-03 |
| KIAA0182 | -2.157434385 | -0.222686039 | 10.56405438 | -2.944417978 | 3.48E-03 | 3.10E-02 |
| ZNF646   | -0.065781057 | -0.222603896 | 9.530627273 | -3.624777817 | 3.38E-04 | 6.24E-03 |
| VPS39    | 2.068744063  | -0.2219      | 10.46832468 | -4.215152749 | 3.29E-05 | 1.23E-03 |
| NFRKB    | -1.723460274 | -0.221737987 | 9.763333604 | -3.097027062 | 2.14E-03 | 2.19E-02 |
| SPRED1   | -2.260448854 | -0.221717532 | 9.617425    | -2.90708623  | 3.91E-03 | 3.36E-02 |
| RGMB     | -2.419214576 | -0.221488636 | 9.136732305 | -2.848646379 | 4.69E-03 | 3.78E-02 |
| ZBED4    | -0.797057396 | -0.221282143 | 9.145304383 | -3.401329776 | 7.59E-04 | 1.08E-02 |
| USP46    | 0.322256654  | -0.221107792 | 8.852782468 | -3.738359816 | 2.21E-04 | 4.60E-03 |
| MPRIP    | -0.397298046 | -0.221083766 | 10.15788994 | -3.52509505  | 4.88E-04 | 7.97E-03 |
| AFF1     | -2.366150446 | -0.220963961 | 10.16421932 | -2.868303967 | 4.41E-03 | 3.63E-02 |
| FHOD1    | -0.559548304 | -0.220847078 | 8.737708929 | -3.475352609 | 5.84E-04 | 9.04E-03 |
| CLMN     | -2.025535561 | -0.220534416 | 9.81044513  | -2.991575318 | 3.00E-03 | 2.78E-02 |
| GRAMD4   | -1.856650642 | -0.220477597 | 9.109324838 | -3.050953573 | 2.48E-03 | 2.45E-02 |
| BBS1     | 0.23297656   | -0.219905844 | 10.21130422 | -3.712507643 | 2.44E-04 | 4.93E-03 |
| ZBTB41   | -0.079764849 | -0.219167532 | 8.872537662 | -3.620623935 | 3.44E-04 | 6.28E-03 |
| CBL      | -1.886659139 | -0.218863312 | 9.799834578 | -3.040482548 | 2.57E-03 | 2.51E-02 |
| MED23    | -0.532756202 | -0.218697727 | 9.302181006 | -3.483611568 | 5.67E-04 | 8.87E-03 |
| AGPAT6   | -0.921234314 | -0.218612338 | 10.17339123 | -3.362029356 | 8.72E-04 | 1.19E-02 |
| LATS1    | -1.860740331 | -0.218522403 | 8.143310227 | -3.049528524 | 2.49E-03 | 2.45E-02 |
| ZNF548   | -2.148113752 | -0.218494805 | 7.874111039 | -2.947773696 | 3.45E-03 | 3.08E-02 |
| DSTYK    | -1.476542701 | -0.218084091 | 9.322767695 | -3.180785324 | 1.62E-03 | 1.82E-02 |
| BTBD12   | -2.374688428 | -0.217931494 | 7.909055032 | -2.865149692 | 4.46E-03 | 3.64E-02 |
| RC3H1    | 3.599002316  | -0.217876623 | 9.602204545 | -4.596549449 | 6.28E-06 | 4.05E-04 |
| TK2      | -1.161361644 | -0.21775487  | 8.671762825 | -3.284797496 | 1.14E-03 | 1.42E-02 |
| ZNF197   | -0.019714175 | -0.217591558 | 8.283236688 | -3.638431272 | 3.22E-04 | 6.04E-03 |
| TBC1D13  | -0.570001389 | -0.21736039  | 9.59058539  | -3.472125421 | 5.90E-04 | 9.11E-03 |
| C9orf5   | -0.309331772 | -0.217223701 | 10.88426023 | -3.55179551  | 4.43E-04 | 7.49E-03 |
| ZNF805   | -1.610354574 | -0.216740584 | 8.214749838 | -3.135654129 | 1.88E-03 | 2.01E-02 |
| EIF3L    | -1.993945677 | -0.216703571 | 12.50336769 | -3.002765956 | 2.90E-03 | 2.72E-02 |
| MTMR9    | -1.566077832 | -0.216479545 | 7.665890747 | -3.150654412 | 1.79E-03 | 1.94E-02 |
| MAP4     | -0.456763148 | -0.216436039 | 12.58352873 | -3.506939738 | 5.21E-04 | 8.36E-03 |
| ZNF292   | -1.862405388 | -0.216379221 | 9.354970779 | -3.048948157 | 2.50E-03 | 2.46E-02 |
| ZHX1     | -2.523468513 | -0.216176299 | 9.757713149 | -2.809646479 | 5.28E-03 | 4.12E-02 |
| CLK4     | -2.215537423 | -0.216068831 | 7.955546753 | -2.923417158 | 3.72E-03 | 3.23E-02 |
| CEP135   | -2.004392316 | -0.21602987  | 7.939850649 | -2.99906961  | 2.93E-03 | 2.74E-02 |
| ZNF500   | -1.464342796 | -0.215675    | 8.375127435 | -3.184870286 | 1.60E-03 | 1.80E-02 |

|           |              |              |             |              |          |          |
|-----------|--------------|--------------|-------------|--------------|----------|----------|
| TPCN2     | -1.550234881 | -0.21558474  | 8.120606331 | -3.156005558 | 1.76E-03 | 1.92E-02 |
| UBR3      | 2.002991871  | -0.215575974 | 9.393980195 | -4.198083838 | 3.53E-05 | 1.29E-03 |
| RELL1     | -2.43125844  | -0.215497078 | 8.122067695 | -2.844166829 | 4.75E-03 | 3.82E-02 |
| POGZ      | -1.724426809 | -0.215351299 | 11.30899708 | -3.096695033 | 2.14E-03 | 2.19E-02 |
| APC       | -1.511311249 | -0.215261364 | 8.701838799 | -3.169116599 | 1.68E-03 | 1.86E-02 |
| TNFRSF10B | -2.550855132 | -0.21503539  | 9.526720617 | -2.799316156 | 5.45E-03 | 4.20E-02 |
| RNF20     | 0.919430879  | -0.214771429 | 9.727662987 | -3.907276718 | 1.15E-04 | 2.91E-03 |
| HAUS3     | -0.938097811 | -0.214433442 | 8.340026786 | -3.35665942  | 8.88E-04 | 1.20E-02 |
| AHI1      | -2.638908759 | -0.214358117 | 7.866064448 | -2.765854086 | 6.02E-03 | 4.50E-02 |
| CEP164    | -2.360432969 | -0.214270455 | 9.770442695 | -2.870414401 | 4.38E-03 | 3.62E-02 |
| SPTAN1    | -1.821253207 | -0.214123052 | 12.73514042 | -3.063261768 | 2.38E-03 | 2.38E-02 |
| CNTROB    | -0.552946374 | -0.214011039 | 9.276062013 | -3.477389404 | 5.79E-04 | 8.99E-03 |
| ATXN1L    | -2.005076833 | -0.213947078 | 9.919915422 | -2.998827256 | 2.93E-03 | 2.74E-02 |
| KIAA1370  | -1.182028955 | -0.213848377 | 8.753423864 | -3.278071353 | 1.17E-03 | 1.44E-02 |
| KLF3      | 4.344130875  | -0.213726299 | 10.61386282 | -4.772601194 | 2.82E-06 | 2.32E-04 |
| CP110     | -2.010483208 | -0.21356526  | 8.478681656 | -2.996912482 | 2.95E-03 | 2.75E-02 |
| PCF11     | 0.173228065  | -0.213440584 | 9.902236201 | -3.695114725 | 2.60E-04 | 5.19E-03 |
| RASAL2    | -1.826930357 | -0.213369156 | 9.172375162 | -3.06129087  | 2.40E-03 | 2.40E-02 |
| SETX      | 1.506802363  | -0.213062987 | 10.09018344 | -4.067226344 | 6.05E-05 | 1.83E-03 |
| NEURL4    | -1.971397069 | -0.213062662 | 8.617869968 | -3.010729797 | 2.82E-03 | 2.67E-02 |
| USP34     | -0.808471437 | -0.21212987  | 11.1329974  | -3.39773494  | 7.69E-04 | 1.09E-02 |
| LUC7L3    | -2.184853568 | -0.211998701 | 10.99858506 | -2.934525233 | 3.59E-03 | 3.17E-02 |
| MGEA5     | -1.223569103 | -0.211625325 | 10.93320747 | -3.264513194 | 1.22E-03 | 1.49E-02 |
| CES2      | -1.700539972 | -0.211454221 | 9.410113799 | -3.104891007 | 2.08E-03 | 2.15E-02 |
| OTUD4     | -1.209464969 | -0.211288312 | 10.23448506 | -3.269122464 | 1.20E-03 | 1.47E-02 |
| KIAA2026  | -2.363000185 | -0.211283117 | 9.420317532 | -2.869466972 | 4.40E-03 | 3.62E-02 |
| ZMYND11   | -0.784824243 | -0.211128247 | 10.73921445 | -3.405178693 | 7.49E-04 | 1.07E-02 |
| RAPH1     | -2.502460794 | -0.210956818 | 8.640068994 | -2.817546314 | 5.15E-03 | 4.05E-02 |
| ZER1      | 1.042807821  | -0.210798377 | 10.8042599  | -3.941357774 | 1.00E-04 | 2.64E-03 |
| CCDC45    | -1.598909445 | -0.210482143 | 8.843716071 | -3.13953799  | 1.86E-03 | 1.99E-02 |
| TLN1      | -2.000416804 | -0.210041234 | 13.15689432 | -3.000476775 | 2.92E-03 | 2.73E-02 |
| DYRK2     | -2.610050179 | -0.210015909 | 10.35919724 | -2.776863064 | 5.83E-03 | 4.39E-02 |
| CYB5D1    | -2.062070217 | -0.209844805 | 8.740263961 | -2.978583657 | 3.13E-03 | 2.88E-02 |
| C5orf41   | -2.606950025 | -0.209663312 | 8.207959903 | -2.778043247 | 5.81E-03 | 4.37E-02 |
| SIK2      | -2.067868048 | -0.209657468 | 9.677645292 | -2.976517049 | 3.15E-03 | 2.89E-02 |
| GOPC      | -0.355426989 | -0.209622403 | 9.545813474 | -3.537827295 | 4.66E-04 | 7.74E-03 |
| FOXP1     | -1.089011283 | -0.209547727 | 9.592491071 | -3.308243621 | 1.05E-03 | 1.34E-02 |
| C1orf107  | -0.322243328 | -0.208987013 | 9.922221429 | -3.547888021 | 4.49E-04 | 7.56E-03 |
| TECPR1    | -2.570863495 | -0.208937662 | 8.090132468 | -2.791746018 | 5.57E-03 | 4.27E-02 |
| MBD5      | -1.437222255 | -0.208907143 | 8.602407468 | -3.193933727 | 1.55E-03 | 1.77E-02 |
| ALKBH8    | -2.44440641  | -0.208875649 | 6.807938149 | -2.839268982 | 4.82E-03 | 3.86E-02 |
| PLDN      | 0.063464867  | -0.20871526  | 9.658748864 | -3.662966226 | 2.94E-04 | 5.65E-03 |
| DPH1      | -1.164994949 | -0.208297727 | 9.663384253 | -3.283615971 | 1.14E-03 | 1.42E-02 |
| DGCR8     | 2.548844047  | -0.208267208 | 9.594657955 | -4.337978657 | 1.95E-05 | 8.81E-04 |
| SECISBP2  | 1.682917193  | -0.208056818 | 9.204706006 | -4.114096779 | 5.00E-05 | 1.61E-03 |



|          |              |              |             |              |          |          |
|----------|--------------|--------------|-------------|--------------|----------|----------|
| GPR107   | -0.232443788 | -0.207862987 | 11.10868539 | -3.574983279 | 4.07E-04 | 7.02E-03 |
| CHD6     | -2.477836001 | -0.207805519 | 10.59631412 | -2.826779685 | 5.01E-03 | 3.96E-02 |
| DOPEY1   | -2.324333595 | -0.207733117 | 8.512058766 | -2.883705657 | 4.21E-03 | 3.53E-02 |
| SLC12A4  | -2.757149303 | -0.207719156 | 9.294050812 | -2.720305908 | 6.89E-03 | 4.94E-02 |
| TUG1     | -0.816372717 | -0.207378571 | 11.89469253 | -3.39524438  | 7.76E-04 | 1.10E-02 |
| SIDT2    | -2.372608501 | -0.207213312 | 10.0794888  | -2.865918403 | 4.45E-03 | 3.64E-02 |
| TMCO7    | -1.91686139  | -0.207015909 | 6.8482375   | -3.029909591 | 2.65E-03 | 2.57E-02 |
| CEP68    | -0.159123097 | -0.2066      | 9.692711039 | -3.596967429 | 3.75E-04 | 6.67E-03 |
| RFC1     | 0.455012685  | -0.206460714 | 9.951808604 | -3.776503057 | 1.91E-04 | 4.15E-03 |
| MYST4    | -2.719023397 | -0.206365909 | 10.2865586  | -2.735071391 | 6.60E-03 | 4.79E-02 |
| SLTM     | -0.491307479 | -0.206299351 | 10.23849903 | -3.496353169 | 5.41E-04 | 8.60E-03 |
| PCMTD2   | -2.089078388 | -0.206166558 | 10.36152776 | -2.968945181 | 3.22E-03 | 2.94E-02 |
| WASH7P   | -2.371454352 | -0.205983117 | 10.27183701 | -2.866344876 | 4.44E-03 | 3.64E-02 |
| TCF12    | -1.127657496 | -0.205812013 | 10.53079205 | -3.295739073 | 1.10E-03 | 1.38E-02 |
| LMTK2    | -2.537599983 | -0.205766558 | 9.012855682 | -2.804320548 | 5.36E-03 | 4.16E-02 |
| PAFAH1B1 | -0.28028991  | -0.20503539  | 10.96452386 | -3.560570204 | 4.29E-04 | 7.32E-03 |
| FBXW7    | -0.632006391 | -0.204026299 | 7.684430357 | -3.452925415 | 6.32E-04 | 9.49E-03 |
| MON2     | 0.266691502  | -0.203617208 | 9.399468669 | -3.722289441 | 2.35E-04 | 4.80E-03 |
| MAVS     | -1.849631947 | -0.203493831 | 11.74373945 | -3.053397776 | 2.46E-03 | 2.43E-02 |
| C9orf41  | -2.760409282 | -0.203354221 | 7.108473539 | -2.719039837 | 6.92E-03 | 4.95E-02 |
| C14orf43 | -1.19834881  | -0.203271104 | 10.44647354 | -3.272750999 | 1.19E-03 | 1.46E-02 |
| MEX3C    | -1.796771904 | -0.203256494 | 9.92709513  | -3.071747179 | 2.32E-03 | 2.33E-02 |
| MAFG     | -1.773585581 | -0.202841234 | 9.0175625   | -3.079763509 | 2.26E-03 | 2.29E-02 |
| SETD2    | -0.056572003 | -0.202786688 | 10.61794367 | -3.627510986 | 3.35E-04 | 6.20E-03 |
| DGKD     | -2.702330197 | -0.202450325 | 8.653474188 | -2.741512562 | 6.47E-03 | 4.73E-02 |
| FTHL3    | -2.573060724 | -0.202443506 | 3.708317208 | -2.790913512 | 5.58E-03 | 4.28E-02 |
| RBM19    | -2.119972289 | -0.202175325 | 9.078215584 | -2.957883712 | 3.34E-03 | 3.02E-02 |
| MRRF     | -2.270285195 | -0.201829545 | 8.986919643 | -2.90349791  | 3.96E-03 | 3.38E-02 |
| ZNF510   | -0.509376476 | -0.201174351 | 7.956903734 | -3.490803911 | 5.52E-04 | 8.72E-03 |
| NUFIP2   | 0.481161609  | -0.200867857 | 10.66894334 | -3.783974918 | 1.86E-04 | 4.06E-03 |
| CASC4    | -1.503761472 | -0.20078961  | 11.12141688 | -3.1716538   | 1.67E-03 | 1.85E-02 |
| BAHD1    | -1.564806657 | -0.200427273 | 9.801078571 | -3.15108408  | 1.79E-03 | 1.94E-02 |
| DDX17    | 3.016031762  | -0.200226948 | 13.0541112  | -4.454629608 | 1.18E-05 | 6.22E-04 |
| OR4F29   | -2.390067382 | -0.200077273 | 0.56300487  | -2.859459779 | 4.53E-03 | 3.70E-02 |
| TCF20    | -1.923596445 | -0.199665909 | 10.20770666 | -3.027547106 | 2.67E-03 | 2.58E-02 |
| NCKIPSD  | -0.360480513 | -0.199665584 | 9.923012013 | -3.536292844 | 4.68E-04 | 7.77E-03 |
| POU4F3   | -2.272744801 | -0.199654221 | 0.824343019 | -2.902599985 | 3.97E-03 | 3.38E-02 |
| CSNK1G1  | -0.190971697 | -0.199551948 | 9.711618831 | -3.587433261 | 3.88E-04 | 6.83E-03 |
| DDX51    | -2.293043954 | -0.199478247 | 8.875446591 | -2.895179354 | 4.06E-03 | 3.44E-02 |
| MINK1    | -1.270604849 | -0.199222727 | 11.09165942 | -3.2490978   | 1.29E-03 | 1.54E-02 |
| POLR1A   | -1.724285485 | -0.198973377 | 9.974090584 | -3.096743583 | 2.14E-03 | 2.19E-02 |
| WHSC1L1  | -2.37248866  | -0.198827273 | 9.835982468 | -2.865962689 | 4.44E-03 | 3.64E-02 |
| BCL2L2   | -2.499831406 | -0.198825325 | 9.241768506 | -2.818533603 | 5.14E-03 | 4.04E-02 |
| ZNF189   | -1.530736185 | -0.198497403 | 8.451892208 | -3.162579853 | 1.72E-03 | 1.89E-02 |
| ZFP90    | -1.81237343  | -0.198458117 | 8.687911201 | -3.066342115 | 2.36E-03 | 2.36E-02 |

|           |              |              |             |              |          |          |
|-----------|--------------|--------------|-------------|--------------|----------|----------|
| PSKH1     | -1.581020524 | -0.198113636 | 9.641373052 | -3.145599538 | 1.82E-03 | 1.96E-02 |
| OXSR1     | -0.376527815 | -0.198049351 | 10.12179675 | -3.531416183 | 4.77E-04 | 7.88E-03 |
| ARHGEF12  | -2.71276218  | -0.19784026  | 11.52362727 | -2.737489008 | 6.55E-03 | 4.76E-02 |
| MAPK1     | -1.796262868 | -0.197794156 | 11.21254253 | -3.071923382 | 2.32E-03 | 2.33E-02 |
| ZNF624    | -0.980126206 | -0.197512013 | 6.06794724  | -3.343241302 | 9.31E-04 | 1.24E-02 |
| KLHDC10   | -2.704126613 | -0.197171104 | 9.250935227 | -2.740820095 | 6.49E-03 | 4.73E-02 |
| TNKS2     | -0.652589117 | -0.197118182 | 10.36477727 | -3.446530112 | 6.47E-04 | 9.65E-03 |
| ARHGAP5   | -1.351223982 | -0.19685487  | 10.71177386 | -3.222516182 | 1.41E-03 | 1.66E-02 |
| RLIM      | 0.645083438  | -0.196600325 | 10.24445763 | -3.830512866 | 1.55E-04 | 3.59E-03 |
| GLTSCR1   | -2.373903598 | -0.196337013 | 9.582450974 | -2.865439777 | 4.45E-03 | 3.64E-02 |
| CALCOCO1  | -2.234916813 | -0.196294805 | 10.73866494 | -2.916380916 | 3.80E-03 | 3.28E-02 |
| TSEN2     | -1.926739426 | -0.196239935 | 7.880953409 | -3.026444036 | 2.68E-03 | 2.59E-02 |
| STAG2     | -1.974216775 | -0.195575974 | 11.09086396 | -3.009735003 | 2.83E-03 | 2.68E-02 |
| USP24     | -1.410572451 | -0.195341558 | 10.40069805 | -3.202816524 | 1.50E-03 | 1.74E-02 |
| CORO7     | -2.656338661 | -0.195267857 | 9.173059578 | -2.759184719 | 6.14E-03 | 4.56E-02 |
| WDR7      | -2.234807049 | -0.195065909 | 8.231951461 | -2.916420814 | 3.80E-03 | 3.28E-02 |
| ADD1      | -0.560188204 | -0.194951948 | 12.05486169 | -3.475155131 | 5.84E-04 | 9.04E-03 |
| MED1      | -1.192239521 | -0.194867208 | 9.956974838 | -3.274743599 | 1.18E-03 | 1.45E-02 |
| FRS2      | -2.399188797 | -0.194227273 | 10.04521039 | -2.856079965 | 4.58E-03 | 3.72E-02 |
| C4orf23   | -2.296668492 | -0.194068182 | 7.902366558 | -2.893852462 | 4.08E-03 | 3.45E-02 |
| TAB1      | -0.395995361 | -0.194043506 | 9.085145779 | -3.525491811 | 4.87E-04 | 7.97E-03 |
| CCDC142   | -1.164013057 | -0.194031169 | 7.95862013  | -3.283935315 | 1.14E-03 | 1.42E-02 |
| SP1       | 0.363522712  | -0.193875649 | 11.61660633 | -3.750254087 | 2.11E-04 | 4.45E-03 |
| TELO2     | -1.415031532 | -0.193851623 | 9.315557305 | -3.201331845 | 1.51E-03 | 1.74E-02 |
| CCDC25    | -2.367007721 | -0.193744156 | 9.327179221 | -2.867987404 | 4.42E-03 | 3.63E-02 |
| AEBP2     | -2.341077871 | -0.193485065 | 9.840616558 | -2.877547881 | 4.29E-03 | 3.57E-02 |
| ZDHHC8    | -2.553721114 | -0.193388636 | 10.0676401  | -2.798233007 | 5.46E-03 | 4.22E-02 |
| RBL2      | -1.011406584 | -0.193222078 | 10.48610584 | -3.333222124 | 9.63E-04 | 1.27E-02 |
| PAN3      | -2.209087627 | -0.192992857 | 9.526610065 | -2.925755397 | 3.69E-03 | 3.22E-02 |
| C5orf40   | -2.626350127 | -0.192721429 | 0.646917857 | -2.770650061 | 5.94E-03 | 4.45E-02 |
| CARD8     | -1.586971945 | -0.192685065 | 8.449127597 | -3.143584151 | 1.83E-03 | 1.97E-02 |
| RAB14     | 0.220995684  | -0.19261526  | 10.91945081 | -3.709025943 | 2.47E-04 | 4.98E-03 |
| ANAPC1    | -1.719676805 | -0.192572403 | 9.812896266 | -3.098326457 | 2.13E-03 | 2.18E-02 |
| TMEM170A  | -2.27462051  | -0.192492532 | 8.766166071 | -2.901915046 | 3.98E-03 | 3.39E-02 |
| AKAP11    | -1.606385849 | -0.192395779 | 9.497404058 | -3.137001411 | 1.87E-03 | 2.00E-02 |
| EHMT1     | -1.879771738 | -0.192122727 | 10.37498344 | -3.042888798 | 2.55E-03 | 2.49E-02 |
| SECISBP2L | -1.73301002  | -0.191853896 | 9.763739935 | -3.093745019 | 2.16E-03 | 2.20E-02 |
| ALAD      | -1.438027424 | -0.191731494 | 9.705650487 | -3.193664992 | 1.55E-03 | 1.77E-02 |
| CXorf23   | -1.265928295 | -0.191723701 | 6.908271266 | -3.250633531 | 1.28E-03 | 1.54E-02 |
| MKL2      | -2.426446393 | -0.191402273 | 9.906881981 | -2.845957405 | 4.73E-03 | 3.80E-02 |
| FNBP4     | -2.063292875 | -0.191107792 | 10.22719416 | -2.978147959 | 3.13E-03 | 2.88E-02 |
| DENND5A   | -2.171313278 | -0.190982468 | 10.03118344 | -2.939414448 | 3.54E-03 | 3.14E-02 |
| RALGDS    | -1.857430547 | -0.190871104 | 10.75779627 | -3.050681864 | 2.48E-03 | 2.45E-02 |
| BTBD7     | -1.885045944 | -0.190760714 | 9.795864448 | -3.04104631  | 2.56E-03 | 2.50E-02 |
| SLC9A8    | -2.356712701 | -0.190152273 | 9.543646591 | -2.871786837 | 4.37E-03 | 3.62E-02 |

|              |              |              |             |              |          |          |
|--------------|--------------|--------------|-------------|--------------|----------|----------|
| TAPT1        | -2.364672871 | -0.190042857 | 8.603454545 | -2.86884951  | 4.41E-03 | 3.63E-02 |
| ASH2L        | -2.504528681 | -0.190033117 | 9.840999026 | -2.816769629 | 5.17E-03 | 4.05E-02 |
| ZMYM2        | -2.052370352 | -0.189902922 | 10.14542841 | -2.98203811  | 3.09E-03 | 2.85E-02 |
| TGFBR1       | -1.516744454 | -0.189650974 | 9.493058279 | -3.167289525 | 1.69E-03 | 1.87E-02 |
| BCLAF1       | 1.66857859   | -0.189488312 | 11.27814805 | -4.110298615 | 5.08E-05 | 1.61E-03 |
| CCDC76       | -2.142429867 | -0.188871429 | 8.188345455 | -2.949818304 | 3.42E-03 | 3.07E-02 |
| RICTOR       | -1.443450301 | -0.188261688 | 9.081650325 | -3.191854495 | 1.56E-03 | 1.78E-02 |
| KIAA1143     | -0.600331294 | -0.188067532 | 9.643843506 | -3.462745957 | 6.11E-04 | 9.31E-03 |
| VHL          | -1.932310549 | -0.188012013 | 9.779340097 | -3.024487848 | 2.70E-03 | 2.60E-02 |
| HDAC5        | -2.532484433 | -0.187980519 | 10.21012013 | -2.806249626 | 5.33E-03 | 4.15E-02 |
| VGLL4        | -0.985705474 | -0.187411688 | 11.65453571 | -3.341456292 | 9.36E-04 | 1.24E-02 |
| KIAA0831     | -1.609168969 | -0.187380844 | 8.747825162 | -3.136056669 | 1.88E-03 | 2.00E-02 |
| CHIC1        | -1.805720156 | -0.187168182 | 8.184069156 | -3.068648199 | 2.34E-03 | 2.35E-02 |
| ZC3H11A      | -1.128590945 | -0.186993831 | 11.3119849  | -3.295436496 | 1.10E-03 | 1.38E-02 |
| ZNF23        | -1.535691881 | -0.186861688 | 7.097759416 | -3.160910173 | 1.73E-03 | 1.89E-02 |
| LOC100130264 | -2.483447342 | -0.186812987 | 0.426835065 | -2.824678159 | 5.04E-03 | 3.97E-02 |
| RNF111       | -1.521474094 | -0.186651948 | 9.461505195 | -3.165698242 | 1.70E-03 | 1.87E-02 |
| ARAP1        | -2.493291448 | -0.186637013 | 11.33144383 | -2.820987821 | 5.10E-03 | 4.01E-02 |
| PUM1         | 1.67609      | -0.186611688 | 11.73615065 | -4.112288708 | 5.03E-05 | 1.61E-03 |
| RIF1         | -2.100513493 | -0.186548052 | 9.172983117 | -2.964855411 | 3.27E-03 | 2.97E-02 |
| FAM193A      | -1.865812242 | -0.186474675 | 10.1216276  | -3.047760351 | 2.51E-03 | 2.46E-02 |
| CNOT1        | -1.789648419 | -0.186427273 | 12.00556623 | -3.074212106 | 2.30E-03 | 2.32E-02 |
| CNNM3        | -1.386638025 | -0.185997078 | 10.24701769 | -3.210774692 | 1.46E-03 | 1.71E-02 |
| RUFY2        | -1.080603985 | -0.185272403 | 8.164329383 | -3.310958114 | 1.04E-03 | 1.33E-02 |
| XRN1         | -1.844085944 | -0.185165909 | 9.513750162 | -3.055327828 | 2.45E-03 | 2.43E-02 |
| SPAG9        | -2.381217272 | -0.185100974 | 9.661080682 | -2.862735454 | 4.49E-03 | 3.67E-02 |
| XPO4         | -2.041357384 | -0.184635065 | 9.120912338 | -2.98595564  | 3.05E-03 | 2.82E-02 |
| CSNK1E       | -1.604180773 | -0.184539286 | 10.85080244 | -3.137749744 | 1.87E-03 | 2.00E-02 |
| CLIP1        | -2.224461496 | -0.184466883 | 9.880796429 | -2.920179006 | 3.76E-03 | 3.26E-02 |
| SMARCC2      | -1.038152144 | -0.184376948 | 11.79416023 | -3.324633247 | 9.93E-04 | 1.29E-02 |
| ERCC6        | -2.590377289 | -0.184221429 | 8.080163961 | -2.784344191 | 5.70E-03 | 4.32E-02 |
| BRD3         | -2.195494008 | -0.183435714 | 10.33921461 | -2.930677714 | 3.64E-03 | 3.19E-02 |
| KHNYN        | -2.467591652 | -0.183403896 | 10.52319805 | -2.830612522 | 4.95E-03 | 3.93E-02 |
| FBXO31       | -0.880917791 | -0.183181169 | 8.712067208 | -3.374835474 | 8.33E-04 | 1.15E-02 |
| ATP6V1C1     | -2.540235931 | -0.182948377 | 10.59272711 | -2.803326039 | 5.38E-03 | 4.17E-02 |
| PRKAR1A      | 0.152266708  | -0.182331818 | 11.81175487 | -3.688995114 | 2.66E-04 | 5.28E-03 |
| C15orf17     | -2.339177761 | -0.182239935 | 9.551181981 | -2.878247281 | 4.28E-03 | 3.57E-02 |
| PHF3         | -2.133928321 | -0.181898052 | 10.449125   | -2.95287399  | 3.39E-03 | 3.05E-02 |
| C17orf66     | -2.457849298 | -0.181869481 | 0.482205519 | -2.834252986 | 4.90E-03 | 3.90E-02 |
| ROCK1        | -1.401328917 | -0.181823052 | 9.910304058 | -3.205892172 | 1.49E-03 | 1.73E-02 |
| SCRN3        | -2.771674064 | -0.181111364 | 7.676081331 | -2.714660633 | 7.01E-03 | 5.00E-02 |
| SURF6        | -1.539889229 | -0.181098052 | 9.075975    | -3.159495352 | 1.74E-03 | 1.90E-02 |
| XIAP         | -0.709808097 | -0.180982468 | 10.00085292 | -3.428693642 | 6.89E-04 | 1.01E-02 |
| ETAA1        | -2.341668492 | -0.180664286 | 8.40239513  | -2.877330451 | 4.29E-03 | 3.58E-02 |
| NCRNA00161   | -1.719278487 | -0.180606494 | 0.395081169 | -3.098463226 | 2.13E-03 | 2.18E-02 |

|           |              |              |             |              |          |          |
|-----------|--------------|--------------|-------------|--------------|----------|----------|
| HDAC7     | -2.263268652 | -0.180482792 | 12.05878458 | -2.906057989 | 3.93E-03 | 3.36E-02 |
| ANO6      | -2.492067171 | -0.179924026 | 10.44293409 | -2.821447024 | 5.09E-03 | 4.01E-02 |
| SS18L1    | -2.634362637 | -0.179854545 | 8.882699351 | -2.767591101 | 5.99E-03 | 4.49E-02 |
| GGT8P     | -2.516753959 | -0.179837013 | 0.431794481 | -2.812173737 | 5.24E-03 | 4.09E-02 |
| CAMTA2    | -2.415730913 | -0.179083117 | 9.861621429 | -2.849940836 | 4.67E-03 | 3.77E-02 |
| ZNF740    | -1.330691551 | -0.178849351 | 9.605848052 | -3.229305455 | 1.38E-03 | 1.63E-02 |
| ZNF652    | -1.964195617 | -0.17866039  | 10.01689513 | -3.013269073 | 2.80E-03 | 2.66E-02 |
| MGC15885  | -2.187761863 | -0.178628571 | 0.41663961  | -2.933474084 | 3.60E-03 | 3.17E-02 |
| TATDN2    | -0.518915659 | -0.178414286 | 10.5025539  | -3.487871007 | 5.58E-04 | 8.76E-03 |
| CEP350    | -1.840840125 | -0.178058117 | 9.475424188 | -3.056456867 | 2.44E-03 | 2.42E-02 |
| MAT2A     | -0.654898463 | -0.178008117 | 12.2268875  | -3.445811887 | 6.49E-04 | 9.66E-03 |
| HS2ST1    | -0.888835556 | -0.177932468 | 9.89557013  | -3.372324034 | 8.41E-04 | 1.16E-02 |
| PDS5A     | 0.012224545  | -0.177748701 | 11.09593539 | -3.647869933 | 3.11E-04 | 5.88E-03 |
| RALGAPA1  | -2.534894777 | -0.177419481 | 8.17175     | -2.80534084  | 5.35E-03 | 4.16E-02 |
| SEPT10    | -2.168584556 | -0.177311364 | 9.899415747 | -2.940398823 | 3.53E-03 | 3.13E-02 |
| HP1BP3    | -1.92221759  | -0.177237987 | 12.00734854 | -3.028030914 | 2.67E-03 | 2.58E-02 |
| KDM3B     | -1.641567484 | -0.177152273 | 11.10347062 | -3.125039191 | 1.95E-03 | 2.05E-02 |
| UBXN2B    | -2.030232564 | -0.176815584 | 10.04929221 | -2.98990805  | 3.02E-03 | 2.79E-02 |
| POLDIP3   | -0.787659648 | -0.176241558 | 10.62085455 | -3.404286948 | 7.51E-04 | 1.07E-02 |
| MED15     | -2.121487505 | -0.176221429 | 10.92563539 | -2.957340191 | 3.34E-03 | 3.02E-02 |
| BAT2L2    | -1.672530955 | -0.175966234 | 12.13337208 | -3.114475621 | 2.02E-03 | 2.10E-02 |
| SON       | -1.128221012 | -0.175764935 | 12.10195714 | -3.295556413 | 1.10E-03 | 1.38E-02 |
| PARP16    | -2.683661905 | -0.175335714 | 8.069366558 | -2.748698835 | 6.34E-03 | 4.66E-02 |
| ZNF263    | -1.066245208 | -0.175317532 | 9.170338636 | -3.315589409 | 1.02E-03 | 1.32E-02 |
| HIRA      | -2.759152549 | -0.175235065 | 9.647278571 | -2.719527978 | 6.91E-03 | 4.95E-02 |
| LDOC1L    | -2.739932743 | -0.175206818 | 10.10571347 | -2.72698299  | 6.76E-03 | 4.86E-02 |
| MED12     | -2.719445365 | -0.17481526  | 10.8040164  | -2.734908386 | 6.60E-03 | 4.79E-02 |
| KCTD3     | -2.095449716 | -0.174714935 | 9.917902273 | -2.966667128 | 3.25E-03 | 2.95E-02 |
| TMEM87B   | -2.017431227 | -0.174714286 | 9.94794026  | -2.994450012 | 2.97E-03 | 2.77E-02 |
| DNAJC5    | -2.590305096 | -0.174156169 | 10.96856412 | -2.784371609 | 5.70E-03 | 4.32E-02 |
| EDEM1     | -2.539343403 | -0.173285714 | 9.567022078 | -2.803662815 | 5.37E-03 | 4.17E-02 |
| SERINC1   | -2.38764595  | -0.173092208 | 11.15873247 | -2.860356372 | 4.52E-03 | 3.69E-02 |
| MGRN1     | -2.636910053 | -0.173086039 | 11.28409399 | -2.766617894 | 6.01E-03 | 4.50E-02 |
| KIAA1310  | -2.41690453  | -0.172975    | 10.61256964 | -2.849504807 | 4.67E-03 | 3.77E-02 |
| CAMSAP1L1 | -2.724403782 | -0.172934416 | 9.86748474  | -2.732992263 | 6.64E-03 | 4.80E-02 |
| CYCSP52   | -0.984232803 | -0.171970455 | 0.395530357 | -3.341927539 | 9.35E-04 | 1.24E-02 |
| NBR1      | -1.66439342  | -0.171930195 | 10.89738555 | -3.117255089 | 2.00E-03 | 2.09E-02 |
| GPATCH8   | -0.936617176 | -0.171412987 | 10.45949026 | -3.357131226 | 8.87E-04 | 1.20E-02 |
| GCFC1     | -2.125566325 | -0.171332468 | 9.005499351 | -2.955876613 | 3.36E-03 | 3.03E-02 |
| SLMAP     | -0.963219631 | -0.171150649 | 9.612798052 | -3.348644942 | 9.13E-04 | 1.22E-02 |
| GGA3      | -2.56857678  | -0.17111526  | 10.20847159 | -2.792612179 | 5.56E-03 | 4.27E-02 |
| ASB1      | -2.71313369  | -0.171073052 | 8.65006737  | -2.737345615 | 6.55E-03 | 4.76E-02 |
| SYNRG     | -2.415625872 | -0.170897078 | 9.39673263  | -2.849979859 | 4.67E-03 | 3.77E-02 |
| C16orf52  | -0.848111864 | -0.170778247 | 7.898601786 | -3.385222815 | 8.04E-04 | 1.12E-02 |
| KIAA1267  | -1.499606698 | -0.170043831 | 10.29488263 | -3.173049258 | 1.66E-03 | 1.85E-02 |

|           |              |              |             |              |          |          |
|-----------|--------------|--------------|-------------|--------------|----------|----------|
| MTMR1     | -2.623573077 | -0.169867532 | 9.652858442 | -2.771709515 | 5.92E-03 | 4.44E-02 |
| MPHOSPH8  | -2.297405234 | -0.169603896 | 9.548898701 | -2.893582681 | 4.08E-03 | 3.45E-02 |
| XPO7      | -1.681279345 | -0.169596429 | 10.74755958 | -3.111484915 | 2.04E-03 | 2.11E-02 |
| PTPN23    | -2.549546313 | -0.168658442 | 11.58131818 | -2.799810669 | 5.44E-03 | 4.20E-02 |
| APPL1     | -1.937852601 | -0.168554221 | 10.3045086  | -3.022540686 | 2.72E-03 | 2.61E-02 |
| EAF1      | -0.959207759 | -0.168247403 | 9.325154221 | -3.34992602  | 9.09E-04 | 1.22E-02 |
| POLR1B    | -2.079895148 | -0.167726623 | 9.754139935 | -2.972225732 | 3.19E-03 | 2.92E-02 |
| REV1      | -0.78542961  | -0.167201948 | 9.12161526  | -3.404988321 | 7.50E-04 | 1.07E-02 |
| CDK12     | -1.673863013 | -0.166742208 | 9.985782143 | -3.11402042  | 2.02E-03 | 2.10E-02 |
| PITPNB    | -2.640805943 | -0.166586364 | 10.24315812 | -2.76512889  | 6.03E-03 | 4.51E-02 |
| ARIH2     | -1.302746503 | -0.166331818 | 10.35529968 | -3.238524473 | 1.33E-03 | 1.59E-02 |
| KDM2A     | -2.454268323 | -0.166278896 | 12.17828718 | -2.83558999  | 4.88E-03 | 3.88E-02 |
| BNIP2     | -2.120548039 | -0.166133442 | 9.316267695 | -2.957677197 | 3.34E-03 | 3.02E-02 |
| DCTN1     | -2.305963084 | -0.165983442 | 11.97584205 | -2.890447215 | 4.12E-03 | 3.48E-02 |
| TOB2      | -1.791020713 | -0.165868506 | 11.00908198 | -3.073737398 | 2.30E-03 | 2.32E-02 |
| PRO1768   | -1.827788854 | -0.165214935 | 0.351819805 | -3.060992728 | 2.40E-03 | 2.40E-02 |
| BRPF1     | -1.514963442 | -0.165200649 | 9.487341883 | -3.167888551 | 1.69E-03 | 1.87E-02 |
| NUP214    | -2.141845945 | -0.164965584 | 10.90361591 | -2.950028277 | 3.42E-03 | 3.07E-02 |
| AMMECR1L  | -1.367349762 | -0.164901623 | 9.179888799 | -3.217174652 | 1.43E-03 | 1.68E-02 |
| BTBD2     | -2.726616848 | -0.164761364 | 11.71210244 | -2.732136636 | 6.66E-03 | 4.81E-02 |
| SPIN1     | -2.348182569 | -0.164387987 | 11.61724302 | -2.874931331 | 4.32E-03 | 3.59E-02 |
| PRPF4B    | -2.353155728 | -0.164312013 | 10.61377386 | -2.873098453 | 4.35E-03 | 3.61E-02 |
| RAB3GAP1  | -2.178980106 | -0.163874351 | 9.911275162 | -2.936647003 | 3.57E-03 | 3.15E-02 |
| C3orf63   | -1.176954253 | -0.163701948 | 10.61333344 | -3.279724095 | 1.16E-03 | 1.43E-02 |
| CELF1     | -2.138226373 | -0.163351948 | 11.20091429 | -2.951329527 | 3.41E-03 | 3.06E-02 |
| RBPJ      | -1.339494934 | -0.162948377 | 9.303421266 | -3.226396151 | 1.39E-03 | 1.64E-02 |
| KCTD2     | -1.607445027 | -0.162427597 | 9.968749188 | -3.1366419   | 1.87E-03 | 2.00E-02 |
| STX17     | -2.509621869 | -0.161482792 | 9.423744318 | -2.814855793 | 5.20E-03 | 4.07E-02 |
| ADAM10    | -2.390523918 | -0.160547078 | 10.3969914  | -2.859290706 | 4.54E-03 | 3.70E-02 |
| PPP1R12A  | -1.943135522 | -0.160192532 | 10.05396477 | -3.02068347  | 2.73E-03 | 2.62E-02 |
| FUBP3     | -0.455527182 | -0.159883442 | 9.970959578 | -3.507317971 | 5.20E-04 | 8.36E-03 |
| ZNF79     | -1.963463027 | -0.159786688 | 6.631375487 | -3.013527276 | 2.80E-03 | 2.66E-02 |
| KLHL28    | -2.442993526 | -0.15918539  | 8.020374188 | -2.83979569  | 4.82E-03 | 3.86E-02 |
| PDCD6IP   | -0.9036913   | -0.158704545 | 11.52480812 | -3.367607253 | 8.55E-04 | 1.17E-02 |
| RBBP6     | -0.898266771 | -0.157564286 | 10.31184643 | -3.36933028  | 8.50E-04 | 1.17E-02 |
| ZC3H7A    | -2.435191748 | -0.155975    | 9.405665747 | -2.842702442 | 4.77E-03 | 3.83E-02 |
| GRINL1A   | -2.45179166  | -0.155853571 | 10.15790568 | -2.836514335 | 4.86E-03 | 3.87E-02 |
| RNF214    | -2.715769934 | -0.154881169 | 8.660771104 | -2.73632789  | 6.57E-03 | 4.77E-02 |
| VEZF1     | -2.548020066 | -0.154763312 | 10.81484821 | -2.800387229 | 5.43E-03 | 4.20E-02 |
| LEMD3     | -2.750044294 | -0.154055519 | 9.299107305 | -2.723063325 | 6.84E-03 | 4.91E-02 |
| CEP63     | -2.479479911 | -0.153642857 | 8.605243506 | -2.826164171 | 5.02E-03 | 3.96E-02 |
| C3orf19   | -1.521063662 | -0.15346461  | 8.538695617 | -3.165836361 | 1.70E-03 | 1.87E-02 |
| SIN3A     | -2.154555987 | -0.153023701 | 11.16780503 | -2.945454675 | 3.47E-03 | 3.09E-02 |
| EIF4ENIF1 | -2.652095153 | -0.152973377 | 9.216625649 | -2.760809862 | 6.11E-03 | 4.55E-02 |
| PUM2      | -2.269689223 | -0.152892532 | 11.34630893 | -2.903715441 | 3.95E-03 | 3.38E-02 |

|           |              |              |             |              |          |          |
|-----------|--------------|--------------|-------------|--------------|----------|----------|
| ZYG11B    | -2.598535778 | -0.152529221 | 9.695621753 | -2.781244032 | 5.75E-03 | 4.35E-02 |
| CIZ1      | -2.589980126 | -0.151073701 | 11.43637614 | -2.784495026 | 5.69E-03 | 4.32E-02 |
| MORC3     | -2.424037378 | -0.151011364 | 9.055609253 | -2.846853405 | 4.71E-03 | 3.80E-02 |
| GGA2      | -2.105448354 | -0.150766234 | 10.44886883 | -2.963088812 | 3.28E-03 | 2.98E-02 |
| FEZ2      | -2.499960411 | -0.149557468 | 9.201743994 | -2.818485171 | 5.14E-03 | 4.04E-02 |
| GIT2      | -2.557856232 | -0.144135065 | 9.826430519 | -2.79666951  | 5.49E-03 | 4.23E-02 |
| ARPP19    | -2.596588341 | -0.143132143 | 11.47573458 | -2.78198434  | 5.74E-03 | 4.34E-02 |
| ZXDC      | -1.834676465 | -0.14295974  | 10.27983312 | -3.058599783 | 2.42E-03 | 2.41E-02 |
| C17orf39  | -2.472835351 | -0.140896429 | 8.171956331 | -2.82865125  | 4.98E-03 | 3.94E-02 |
| SNRK      | -1.809796024 | -0.140330844 | 9.044454058 | -3.06723566  | 2.35E-03 | 2.36E-02 |
| RAB5A     | -1.644911891 | -0.139413636 | 10.37050422 | -3.123899817 | 1.95E-03 | 2.06E-02 |
| GOSR1     | -1.918460637 | -0.137493506 | 9.770957792 | -3.029348773 | 2.66E-03 | 2.57E-02 |
| PPP1R10   | -2.569795974 | -0.134058117 | 10.63809302 | -2.792150404 | 5.56E-03 | 4.27E-02 |
| ZBTB11    | -1.288043243 | -0.130719805 | 9.345624513 | -3.243365246 | 1.31E-03 | 1.57E-02 |
| CTCF      | -2.460778717 | -0.114725    | 10.40530893 | -2.833158804 | 4.91E-03 | 3.91E-02 |
| YTHDC1    | -2.28483887  | -0.106495779 | 10.40872354 | -2.898180995 | 4.02E-03 | 3.42E-02 |
| IL4       | -2.762353983 | -0.082563636 | 0.107215584 | -2.71828431  | 6.93E-03 | 4.96E-02 |
| C17orf105 | -2.283342737 | -0.05092987  | 0.037681169 | -2.898728005 | 4.02E-03 | 3.41E-02 |
| SFRS7     | -1.940742877 | 0.119678247  | 11.24621315 | 3.021524739  | 2.73E-03 | 2.61E-02 |
| TPM3      | -2.711505521 | 0.124333766  | 13.05996948 | 2.737973992  | 6.54E-03 | 4.76E-02 |
| SAR1A     | -2.62677399  | 0.12834026   | 10.74668442 | 2.770488322  | 5.94E-03 | 4.45E-02 |
| GORASP2   | -2.467587567 | 0.130933766  | 11.92969416 | 2.830614049  | 4.95E-03 | 3.93E-02 |
| ADIPOR1   | -2.686965807 | 0.131529221  | 11.99071396 | 2.747428314  | 6.36E-03 | 4.67E-02 |
| CSTF1     | -2.679049557 | 0.131587013  | 10.13916558 | 2.750471588  | 6.30E-03 | 4.64E-02 |
| COPB1     | -2.668607704 | 0.13274513   | 11.37366347 | 2.754480901  | 6.23E-03 | 4.60E-02 |
| RBM4      | -0.718277504 | 0.13403539   | 11.39649886 | 3.426046248  | 6.96E-04 | 1.02E-02 |
| RNF114    | -2.177097628 | 0.135319481  | 11.16043961 | 2.937326737  | 3.56E-03 | 3.15E-02 |
| SF3B4     | -2.474111103 | 0.135911039  | 11.78335942 | 2.828173893  | 4.99E-03 | 3.95E-02 |
| PRPF19    | -2.321920077 | 0.136643182  | 11.32890211 | 2.884592213  | 4.20E-03 | 3.52E-02 |
| GANAB     | -2.086868013 | 0.136673701  | 13.53766477 | 2.969735111  | 3.22E-03 | 2.93E-02 |
| RAB1A     | -0.427270082 | 0.137688636  | 11.82782549 | 3.515955057  | 5.04E-04 | 8.17E-03 |
| PPP1R8    | -1.978603682 | 0.138738961  | 10.05732208 | 3.008186683  | 2.85E-03 | 2.69E-02 |
| DAP3      | -2.110253424 | 0.139522727  | 10.88210747 | 2.961367721  | 3.30E-03 | 3.00E-02 |
| SNRPA     | -1.862532305 | 0.140779545  | 10.94152808 | 3.048903915  | 2.50E-03 | 2.46E-02 |
| DPF2      | -1.837491181 | 0.141346753  | 10.79708961 | 3.057621368  | 2.43E-03 | 2.42E-02 |
| EIF2S2    | -2.211390123 | 0.143480519  | 10.48375779 | 2.924920878  | 3.70E-03 | 3.22E-02 |
| ECD       | -2.513900248 | 0.143786039  | 9.547645617 | 2.813247179  | 5.22E-03 | 4.08E-02 |
| RALY      | -2.37834737  | 0.144015909  | 11.97049756 | 2.863796924  | 4.47E-03 | 3.66E-02 |
| UNC50     | -2.426772105 | 0.144575325  | 9.580385714 | 2.84583624   | 4.73E-03 | 3.80E-02 |
| TIPRL     | -2.25293729  | 0.145026623  | 10.05278929 | 2.909823652  | 3.88E-03 | 3.34E-02 |
| SMARCAL1  | -1.71733993  | 0.145102273  | 9.350569318 | 3.099128779  | 2.12E-03 | 2.18E-02 |
| YIPF5     | -2.536126743 | 0.145225325  | 10.06624708 | 2.804876237  | 5.35E-03 | 4.16E-02 |
| C2orf24   | -2.76545381  | 0.146472727  | 10.62214545 | 2.717079598  | 6.96E-03 | 4.97E-02 |
| CCDC86    | -1.987106572 | 0.147517857  | 9.720010877 | 3.005183526  | 2.87E-03 | 2.71E-02 |
| WDR46     | -2.670161052 | 0.147717857  | 10.00524399 | 2.75388482   | 6.24E-03 | 4.61E-02 |

|           |              |             |             |             |          |          |
|-----------|--------------|-------------|-------------|-------------|----------|----------|
| TPRA1     | -2.115946184 | 0.14861461  | 9.979565097 | 2.959327456 | 3.32E-03 | 3.01E-02 |
| HNRNPL    | 2.046603543  | 0.149598377 | 12.17210568 | 4.209412049 | 3.37E-05 | 1.26E-03 |
| TMEM138   | -2.006764516 | 0.150193831 | 9.509628734 | 2.998229654 | 2.94E-03 | 2.74E-02 |
| GOLPH3    | -2.419616013 | 0.151033117 | 11.60996006 | 2.848497178 | 4.69E-03 | 3.78E-02 |
| INO80E    | -2.676134838 | 0.151761364 | 9.546744318 | 2.751591298 | 6.28E-03 | 4.63E-02 |
| BUB3      | -2.339852143 | 0.152037662 | 10.91697987 | 2.877999071 | 4.28E-03 | 3.57E-02 |
| C1orf174  | -2.688647861 | 0.152749351 | 9.271012338 | 2.746781263 | 6.37E-03 | 4.68E-02 |
| PSMC2     | -1.517853185 | 0.152920779 | 10.50688506 | 3.16691656  | 1.70E-03 | 1.87E-02 |
| ABCF3     | -1.911621008 | 0.153484091 | 10.40123555 | 3.031746586 | 2.64E-03 | 2.56E-02 |
| HSPA8     | -2.407454127 | 0.15432987  | 14.72253766 | 2.85301409  | 4.62E-03 | 3.75E-02 |
| TMCO1     | -2.574252105 | 0.154440909 | 11.11676461 | 2.790462012 | 5.59E-03 | 4.28E-02 |
| ATP5B     | -2.732855728 | 0.154658442 | 14.16607532 | 2.729723157 | 6.70E-03 | 4.84E-02 |
| ZC3H15    | -1.519949333 | 0.154664286 | 10.52745292 | 3.166211328 | 1.70E-03 | 1.87E-02 |
| RBM34     | -2.321516723 | 0.154693506 | 9.305936364 | 2.884740351 | 4.19E-03 | 3.52E-02 |
| C14orf169 | -2.364614552 | 0.155176948 | 8.133568994 | 2.86887104  | 4.40E-03 | 3.63E-02 |
| MDH1      | -2.621307023 | 0.156852597 | 11.09774318 | 2.772573738 | 5.90E-03 | 4.43E-02 |
| BZW1      | -1.845573356 | 0.157072078 | 11.54024448 | 3.05481031  | 2.45E-03 | 2.43E-02 |
| PARK7     | -2.651911725 | 0.157290909 | 11.49379026 | 2.760880089 | 6.11E-03 | 4.55E-02 |
| WIBG      | -2.219783134 | 0.157864286 | 9.206075649 | 2.921876999 | 3.74E-03 | 3.24E-02 |
| ELAVL1    | -0.064475627 | 0.158641558 | 11.15703117 | 3.625165372 | 3.38E-04 | 6.23E-03 |
| SCYL1     | -0.392970676 | 0.159137987 | 11.30531964 | 3.526412885 | 4.85E-04 | 7.96E-03 |
| GPN1      | -2.527276897 | 0.159273052 | 10.3146112  | 2.808212101 | 5.30E-03 | 4.13E-02 |
| VIPAR     | -2.359457046 | 0.159382143 | 9.197915097 | 2.870774487 | 4.38E-03 | 3.62E-02 |
| HPS6      | -2.128313452 | 0.159382468 | 9.045498377 | 2.954890493 | 3.37E-03 | 3.04E-02 |
| PPME1     | -2.741206325 | 0.15938474  | 10.58335795 | 2.726489591 | 6.77E-03 | 4.87E-02 |
| TMEM110   | -2.451325295 | 0.159446429 | 7.715370617 | 2.836688361 | 4.86E-03 | 3.87E-02 |
| SARNP     | -2.53614701  | 0.159571429 | 9.522637662 | 2.804868593 | 5.35E-03 | 4.16E-02 |
| GDI2      | -2.742330014 | 0.159736688 | 12.58773328 | 2.726054191 | 6.78E-03 | 4.87E-02 |
| ALKBH1    | -2.1142832   | 0.160158117 | 8.171773864 | 2.959923601 | 3.32E-03 | 3.01E-02 |
| H2AFY     | -2.665799503 | 0.160270455 | 12.04916899 | 2.755558208 | 6.21E-03 | 4.59E-02 |
| PRCC      | -0.159289799 | 0.160302597 | 11.28494416 | 3.596917586 | 3.75E-04 | 6.67E-03 |
| WDR74     | -2.583428383 | 0.160942857 | 9.934154545 | 2.786982137 | 5.65E-03 | 4.31E-02 |
| YIPF6     | -2.708600126 | 0.161091234 | 8.261275487 | 2.739094961 | 6.52E-03 | 4.75E-02 |
| SUMO1     | -1.729705942 | 0.161319481 | 10.7735013  | 3.094880929 | 2.15E-03 | 2.20E-02 |
| MARS      | -2.337568859 | 0.161372078 | 11.05930487 | 2.878839366 | 4.27E-03 | 3.57E-02 |
| YIPF3     | -1.793731607 | 0.161949026 | 12.12591153 | 3.072799435 | 2.31E-03 | 2.32E-02 |
| TP53RK    | -1.891579521 | 0.162145779 | 9.176701461 | 3.038762418 | 2.58E-03 | 2.51E-02 |
| MMADHC    | -1.236168079 | 0.162252273 | 10.86760601 | 3.260390686 | 1.24E-03 | 1.50E-02 |
| FDPS      | -2.464770102 | 0.162530195 | 11.4434138  | 2.831667317 | 4.94E-03 | 3.92E-02 |
| C11orf58  | -1.596874274 | 0.162631494 | 11.36222289 | 3.140228147 | 1.85E-03 | 1.99E-02 |
| SFRS9     | -1.796642775 | 0.162740584 | 11.41668912 | 3.071791878 | 2.32E-03 | 2.33E-02 |
| WDR70     | -1.615192856 | 0.162897403 | 9.185621429 | 3.134010922 | 1.89E-03 | 2.01E-02 |
| RCE1      | -2.18915004  | 0.163080519 | 9.443328571 | 2.932972228 | 3.61E-03 | 3.17E-02 |
| C12orf44  | -2.471558555 | 0.163345455 | 10.06464221 | 2.829128922 | 4.97E-03 | 3.94E-02 |
| CREG1     | -2.579489219 | 0.163626299 | 12.02882484 | 2.788476472 | 5.63E-03 | 4.30E-02 |

|           |              |             |             |             |          |          |
|-----------|--------------|-------------|-------------|-------------|----------|----------|
| LOC729020 | -2.759579023 | 0.164049351 | 5.133851948 | 2.719362336 | 6.91E-03 | 4.95E-02 |
| NFS1      | -2.64524252  | 0.164721753 | 9.134823214 | 2.763432308 | 6.06E-03 | 4.53E-02 |
| UBE2D2    | -1.917992111 | 0.164946429 | 11.47219334 | 3.029513084 | 2.66E-03 | 2.57E-02 |
| PPP2R5D   | -2.680291258 | 0.165148052 | 10.44087662 | 2.749994448 | 6.31E-03 | 4.65E-02 |
| TRA2B     | 2.585443374  | 0.165441558 | 11.75066494 | 4.347216219 | 1.88E-05 | 8.58E-04 |
| BRIX1     | -2.684596712 | 0.165512662 | 9.694835552 | 2.74833941  | 6.34E-03 | 4.66E-02 |
| SKP1      | -2.331744763 | 0.165927922 | 11.89948409 | 2.880981705 | 4.24E-03 | 3.55E-02 |
| BCCIP     | -2.056859927 | 0.166191234 | 10.09693458 | 2.980439688 | 3.11E-03 | 2.86E-02 |
| OTUB1     | -0.721431304 | 0.166669481 | 12.21978864 | 3.42505994  | 6.98E-04 | 1.02E-02 |
| ZC3HC1    | -1.899403581 | 0.166751948 | 8.709762987 | 3.036025298 | 2.60E-03 | 2.54E-02 |
| DSTN      | -2.471778843 | 0.167198701 | 12.2391039  | 2.829046514 | 4.98E-03 | 3.94E-02 |
| UBE2E1    | -2.576267477 | 0.167363961 | 11.01122873 | 2.789698085 | 5.61E-03 | 4.29E-02 |
| GPS1      | -2.755790409 | 0.167640909 | 11.58573929 | 2.720833493 | 6.88E-03 | 4.94E-02 |
| PPP2R2D   | -1.655926139 | 0.167684416 | 9.506754545 | 3.120144723 | 1.98E-03 | 2.07E-02 |
| PSMD12    | -2.003268043 | 0.167743831 | 9.461134903 | 2.999467618 | 2.93E-03 | 2.74E-02 |
| USF1      | -0.667785857 | 0.167832143 | 9.935959578 | 3.441801263 | 6.58E-04 | 9.75E-03 |
| TMEM60    | -2.451295912 | 0.168012338 | 8.677408766 | 2.836699326 | 4.86E-03 | 3.87E-02 |
| HSPA4     | -2.476563504 | 0.168054221 | 11.05532451 | 2.827256046 | 5.00E-03 | 3.95E-02 |
| PRKRA     | -1.460651585 | 0.168188636 | 10.31592094 | 3.186105271 | 1.59E-03 | 1.79E-02 |
| COPG      | -0.070828822 | 0.16830974  | 12.27104578 | 3.623278882 | 3.40E-04 | 6.26E-03 |
| ZCCHC17   | -2.711985095 | 0.16851039  | 9.767309091 | 2.737788918 | 6.55E-03 | 4.76E-02 |
| CIDCEP    | -2.446347663 | 0.168811039 | 7.114155519 | 2.838545154 | 4.83E-03 | 3.87E-02 |
| ARMC1     | -2.514509372 | 0.168955195 | 9.865963961 | 2.813018086 | 5.22E-03 | 4.08E-02 |
| SEC61A1   | 0.645357882  | 0.168984091 | 12.90029075 | 3.830590351 | 1.55E-04 | 3.59E-03 |
| METTL5    | -2.301169386 | 0.168998701 | 9.646386364 | 2.892203949 | 4.10E-03 | 3.46E-02 |
| ARPC5     | -2.434622493 | 0.169130519 | 12.32316331 | 2.842914422 | 4.77E-03 | 3.83E-02 |
| PSMD1     | 0.49655168   | 0.169402597 | 10.90449935 | 3.78836626  | 1.82E-04 | 4.01E-03 |
| ACOT8     | -2.24827027  | 0.169939286 | 9.383387825 | 2.911523218 | 3.86E-03 | 3.32E-02 |
| EIF5A     | -2.605192914 | 0.170000325 | 12.45030925 | 2.778711943 | 5.79E-03 | 4.37E-02 |
| COPS8     | -2.148289631 | 0.170157792 | 10.38291591 | 2.947710407 | 3.45E-03 | 3.08E-02 |
| NCSTN     | -0.844354263 | 0.170188961 | 11.928575   | 3.386410702 | 8.00E-04 | 1.12E-02 |
| C10orf84  | -2.680729507 | 0.170334091 | 9.024845617 | 2.749826026 | 6.32E-03 | 4.65E-02 |
| AKR1A1    | -2.069878197 | 0.170601948 | 10.91330357 | 2.975800225 | 3.15E-03 | 2.89E-02 |
| MESDC2    | -1.637664067 | 0.171863636 | 10.13062857 | 3.126368517 | 1.94E-03 | 2.05E-02 |
| PRKAG1    | -0.81473725  | 0.171887013 | 10.27616818 | 3.395760034 | 7.74E-04 | 1.09E-02 |
| NUP35     | -2.081561242 | 0.17234513  | 8.542180357 | 2.971630803 | 3.20E-03 | 2.92E-02 |
| UMPS      | 0.052120667  | 0.172745455 | 9.671135065 | 3.659628931 | 2.97E-04 | 5.70E-03 |
| COPS3     | -1.966912104 | 0.173008117 | 9.687289773 | 3.01231146  | 2.81E-03 | 2.66E-02 |
| GPN3      | -1.902563493 | 0.17316526  | 8.632437825 | 3.034919196 | 2.61E-03 | 2.54E-02 |
| PCCB      | -1.917511878 | 0.173205844 | 10.5521224  | 3.029681492 | 2.66E-03 | 2.57E-02 |
| PYCR2     | -2.148785625 | 0.173492208 | 10.71895325 | 2.947531921 | 3.45E-03 | 3.08E-02 |
| RAD1      | -2.365995197 | 0.173492208 | 9.201024026 | 2.868361292 | 4.41E-03 | 3.63E-02 |
| TMEM9     | -2.280685774 | 0.173553247 | 11.38958052 | 2.899699191 | 4.00E-03 | 3.41E-02 |
| RPP30     | -1.572821125 | 0.173634091 | 9.242606006 | 3.148374204 | 1.80E-03 | 1.95E-02 |
| ILKAP     | -0.914003167 | 0.174113961 | 8.674610227 | 3.364329577 | 8.65E-04 | 1.18E-02 |



|          |              |             |             |             |          |          |
|----------|--------------|-------------|-------------|-------------|----------|----------|
| SEC23B   | -1.716998797 | 0.174133117 | 10.60894968 | 3.099245884 | 2.12E-03 | 2.18E-02 |
| EIF6     | -2.321215447 | 0.174656494 | 11.58193539 | 2.884850995 | 4.19E-03 | 3.52E-02 |
| BAX      | -2.394029815 | 0.174866558 | 9.016007955 | 2.857992019 | 4.55E-03 | 3.70E-02 |
| DNTTIP1  | -0.859815978 | 0.175097078 | 9.86912776  | 3.381520331 | 8.14E-04 | 1.13E-02 |
| MFSD5    | 0.122049423  | 0.175113636 | 9.709112662 | 3.680156927 | 2.75E-04 | 5.42E-03 |
| SFRS3    | 3.558392264  | 0.175191234 | 12.2615638  | 4.586787104 | 6.56E-06 | 4.17E-04 |
| TMEM55B  | -2.735605725 | 0.175450649 | 9.352398052 | 2.72865869  | 6.73E-03 | 4.85E-02 |
| RAB1B    | -0.22079445  | 0.175466883 | 12.4917737  | 3.578484439 | 4.01E-04 | 6.98E-03 |
| WDR18    | -2.64850414  | 0.175475974 | 9.553710714 | 2.762184408 | 6.09E-03 | 4.53E-02 |
| VPS25    | -2.511253517 | 0.175508766 | 10.16626737 | 2.814242418 | 5.20E-03 | 4.08E-02 |
| GRK6     | -1.622204151 | 0.176194805 | 10.2122526  | 3.131628272 | 1.91E-03 | 2.02E-02 |
| C3orf26  | -2.587822384 | 0.176467208 | 8.967689448 | 2.78531436  | 5.68E-03 | 4.32E-02 |
| MGAT2    | -1.063773881 | 0.176807792 | 9.454424675 | 3.316385907 | 1.02E-03 | 1.32E-02 |
| SRP9     | -1.783112129 | 0.176895779 | 12.5809362  | 3.076472217 | 2.28E-03 | 2.31E-02 |
| BET1     | -1.445882875 | 0.177533117 | 9.219206169 | 3.191042038 | 1.56E-03 | 1.78E-02 |
| NSUN5    | -1.469368653 | 0.177542857 | 9.608582468 | 3.183188044 | 1.61E-03 | 1.81E-02 |
| RFWD2    | 0.068387839  | 0.177615584 | 10.17751883 | 3.664413627 | 2.92E-04 | 5.64E-03 |
| TMED10   | -1.847470615 | 0.177664286 | 12.90758344 | 3.054150073 | 2.45E-03 | 2.43E-02 |
| AAMP     | 0.577167248  | 0.1778      | 11.20242468 | 3.811293754 | 1.67E-04 | 3.80E-03 |
| TMEM53   | -2.759706096 | 0.177902922 | 8.296181981 | 2.719312979 | 6.91E-03 | 4.95E-02 |
| C7orf11  | -2.299773653 | 0.177930519 | 9.166849026 | 2.89271525  | 4.09E-03 | 3.46E-02 |
| SNRNP40  | -2.180993249 | 0.178467532 | 9.831347403 | 2.935919924 | 3.58E-03 | 3.16E-02 |
| TBL2     | -1.000649484 | 0.178491234 | 10.26444432 | 3.336670797 | 9.52E-04 | 1.26E-02 |
| GUSB     | -2.580469793 | 0.178539286 | 10.42609302 | 2.788104559 | 5.63E-03 | 4.30E-02 |
| STT3A    | -1.728632633 | 0.178796753 | 11.58809838 | 3.095249838 | 2.15E-03 | 2.19E-02 |
| PAIP1    | -1.559053092 | 0.178947727 | 10.00852192 | 3.15302815  | 1.78E-03 | 1.93E-02 |
| SRM      | -2.150122234 | 0.179077273 | 11.18621721 | 2.947050884 | 3.45E-03 | 3.09E-02 |
| TBCCD1   | -2.759415567 | 0.179636688 | 8.673887175 | 2.719425823 | 6.91E-03 | 4.95E-02 |
| C6orf136 | -2.371149982 | 0.180304221 | 8.872335877 | 2.866457335 | 4.44E-03 | 3.64E-02 |
| SUCLA2   | -2.295605853 | 0.180544481 | 9.453076136 | 2.894241539 | 4.07E-03 | 3.45E-02 |
| VPS72    | -1.873795522 | 0.181029545 | 10.95315503 | 3.04497526  | 2.53E-03 | 2.48E-02 |
| PIGK     | -1.522277756 | 0.181463312 | 9.318336201 | 3.165427776 | 1.70E-03 | 1.87E-02 |
| SEC13    | -0.679398221 | 0.181505195 | 11.07563377 | 3.438183737 | 6.66E-04 | 9.86E-03 |
| SNF8     | -2.738585955 | 0.181618831 | 9.496978896 | 2.727504658 | 6.75E-03 | 4.86E-02 |
| C2orf47  | -0.607588315 | 0.181805195 | 8.652198701 | 3.460498261 | 6.16E-04 | 9.34E-03 |
| KDELR2   | -2.060205173 | 0.182092532 | 12.46408198 | 2.979248156 | 3.12E-03 | 2.87E-02 |
| MRPS16   | -1.618232908 | 0.182189286 | 11.01592256 | 3.132978029 | 1.90E-03 | 2.02E-02 |
| PNO1     | -0.613478432 | 0.182517532 | 9.465797078 | 3.458672943 | 6.20E-04 | 9.36E-03 |
| ATF6B    | -1.96451373  | 0.182861364 | 11.83472808 | 3.013156947 | 2.80E-03 | 2.66E-02 |
| C3orf38  | -0.456428639 | 0.184032143 | 9.201843344 | 3.507042109 | 5.21E-04 | 8.36E-03 |
| UCK2     | -1.961391596 | 0.184192532 | 9.139376136 | 3.014257244 | 2.79E-03 | 2.65E-02 |
| SRI      | -2.362830964 | 0.184477922 | 10.74758312 | 2.869529433 | 4.40E-03 | 3.62E-02 |
| LZIC     | -2.261998289 | 0.184583766 | 8.462904221 | 2.906521271 | 3.92E-03 | 3.36E-02 |
| HNRNPC   | 2.073017512  | 0.184585714 | 13.10122273 | 4.216259992 | 3.27E-05 | 1.23E-03 |
| CAP1     | -2.359503083 | 0.185006818 | 12.51818458 | 2.870757501 | 4.38E-03 | 3.62E-02 |

|            |              |             |             |             |          |          |
|------------|--------------|-------------|-------------|-------------|----------|----------|
| SUMO2      | -2.409829015 | 0.185230519 | 11.87145682 | 2.852132591 | 4.64E-03 | 3.75E-02 |
| CHST12     | -1.960583553 | 0.185875649 | 8.863428084 | 3.014541952 | 2.79E-03 | 2.65E-02 |
| HEXB       | -2.284241729 | 0.185928571 | 10.36564286 | 2.898399331 | 4.02E-03 | 3.42E-02 |
| ARPC2      | 1.487061724  | 0.186069156 | 12.46994497 | 4.061942551 | 6.18E-05 | 1.85E-03 |
| PSMG2      | -1.173761052 | 0.186178571 | 10.2480237  | 3.280763668 | 1.15E-03 | 1.43E-02 |
| MRPL18     | -2.218939889 | 0.186807143 | 9.837363961 | 2.922182953 | 3.73E-03 | 3.24E-02 |
| MDH2       | -2.043488427 | 0.186849351 | 12.66880325 | 2.985197963 | 3.06E-03 | 2.83E-02 |
| RAE1       | -2.388156163 | 0.187487662 | 10.42913474 | 2.860167475 | 4.52E-03 | 3.69E-02 |
| FLOT1      | -2.614697604 | 0.187492208 | 12.20798701 | 2.775092965 | 5.86E-03 | 4.41E-02 |
| MTERFD1    | -2.147218913 | 0.187680844 | 8.905673539 | 2.948095676 | 3.44E-03 | 3.08E-02 |
| TMED4      | -1.494944083 | 0.18787987  | 10.80298929 | 3.174614601 | 1.65E-03 | 1.84E-02 |
| UBE2J2     | -1.663290558 | 0.188400325 | 10.3028664  | 3.117631606 | 2.00E-03 | 2.09E-02 |
| NAA20      | -1.212362783 | 0.188470779 | 10.0338211  | 3.268175944 | 1.21E-03 | 1.48E-02 |
| PSMC1      | -1.989441367 | 0.188853247 | 8.792816883 | 3.0043584   | 2.88E-03 | 2.71E-02 |
| MIIP       | -1.484699002 | 0.188941234 | 9.588344643 | 3.17805157  | 1.63E-03 | 1.83E-02 |
| XAB2       | -2.721713511 | 0.189033766 | 10.62032922 | 2.734032045 | 6.62E-03 | 4.80E-02 |
| CDKN2AIPNL | -2.659469244 | 0.189353896 | 8.574117208 | 2.757985212 | 6.16E-03 | 4.57E-02 |
| JMJD4      | -1.881762952 | 0.189354545 | 9.115698701 | 3.042193312 | 2.55E-03 | 2.50E-02 |
| AIP        | -1.948143025 | 0.189464935 | 10.21962857 | 3.018922085 | 2.75E-03 | 2.63E-02 |
| LSM12      | 0.062611803  | 0.18949513  | 10.34962679 | 3.662715364 | 2.94E-04 | 5.65E-03 |
| ERP44      | -1.788305877 | 0.189698377 | 10.92462256 | 3.074676456 | 2.30E-03 | 2.32E-02 |
| FUCA1      | -2.179952211 | 0.189749351 | 10.0352039  | 2.936295933 | 3.57E-03 | 3.15E-02 |
| ZCCHC10    | -0.936040666 | 0.189962338 | 8.219798052 | 3.357314914 | 8.86E-04 | 1.20E-02 |
| SDF2       | -1.557868136 | 0.19025487  | 9.566596266 | 3.153428395 | 1.77E-03 | 1.93E-02 |
| EIF2B2     | -1.116782382 | 0.19061039  | 9.449287013 | 3.299262327 | 1.08E-03 | 1.37E-02 |
| EXOSC3     | -1.094863973 | 0.190682143 | 8.76165211  | 3.30635272  | 1.06E-03 | 1.35E-02 |
| TMEM39A    | 0.696777042  | 0.190725    | 9.840551461 | 3.845082925 | 1.47E-04 | 3.45E-03 |
| SCAMP3     | 1.076403972  | 0.190835714 | 11.19207305 | 3.950592315 | 9.68E-05 | 2.56E-03 |
| MON1A      | -1.253914378 | 0.191041234 | 8.242256981 | 3.25457568  | 1.26E-03 | 1.52E-02 |
| RABIF      | -0.236111082 | 0.191055844 | 8.815032468 | 3.573880438 | 4.08E-04 | 7.04E-03 |
| PIGF       | -2.361345438 | 0.191230844 | 8.470614773 | 2.870077689 | 4.39E-03 | 3.62E-02 |
| PSMD4      | -0.428494394 | 0.191703571 | 11.03152256 | 3.515581237 | 5.05E-04 | 8.17E-03 |
| B4GALT3    | -0.683148995 | 0.191711364 | 10.20315179 | 3.43701453  | 6.69E-04 | 9.88E-03 |
| TARBP2     | -2.137404117 | 0.191755519 | 9.806339448 | 2.951625056 | 3.40E-03 | 3.06E-02 |
| RWDD1      | -2.315621089 | 0.191958766 | 9.021936526 | 2.886904803 | 4.17E-03 | 3.51E-02 |
| TSG101     | -1.077025492 | 0.192225649 | 10.42827776 | 3.312112888 | 1.04E-03 | 1.33E-02 |
| TMEM134    | -2.44544965  | 0.19226039  | 9.816941883 | 2.838880015 | 4.83E-03 | 3.87E-02 |
| TAGLN2     | -2.441841461 | 0.192468506 | 13.6374375  | 2.840225099 | 4.81E-03 | 3.85E-02 |
| POLD2      | -2.386747335 | 0.192613312 | 11.30639367 | 2.860689038 | 4.52E-03 | 3.69E-02 |
| SUMO1P3    | -0.427681393 | 0.192720779 | 8.82770974  | 3.515829475 | 5.04E-04 | 8.17E-03 |
| PEX16      | -1.258264291 | 0.192885714 | 8.86083961  | 3.253148849 | 1.27E-03 | 1.52E-02 |
| UTP11L     | -1.041620133 | 0.192952597 | 9.540625649 | 3.323518054 | 9.96E-04 | 1.30E-02 |
| DPY30      | -2.643145681 | 0.192953571 | 10.20840731 | 2.764234279 | 6.05E-03 | 4.52E-02 |
| VPS29      | -1.568003313 | 0.192962987 | 10.44371136 | 3.150003479 | 1.79E-03 | 1.94E-02 |
| OBFC2B     | -1.119540232 | 0.193218506 | 9.910704708 | 3.298369186 | 1.09E-03 | 1.38E-02 |

|           |              |             |             |             |          |          |
|-----------|--------------|-------------|-------------|-------------|----------|----------|
| MRPS18C   | -2.199640981 | 0.193262013 | 8.240360877 | 2.929176902 | 3.65E-03 | 3.20E-02 |
| C14orf119 | -1.84266661  | 0.193298377 | 10.15060568 | 3.055821584 | 2.44E-03 | 2.43E-02 |
| PSMD2     | -0.984602917 | 0.193424026 | 12.33700617 | 3.34180911  | 9.35E-04 | 1.24E-02 |
| CCDC90A   | -2.492483106 | 0.193593831 | 9.070224188 | 2.821291023 | 5.09E-03 | 4.01E-02 |
| PTPMT1    | -1.372425203 | 0.193856818 | 9.839260877 | 3.215491742 | 1.44E-03 | 1.68E-02 |
| NSMCE4A   | -1.76820195  | 0.193857468 | 9.127363799 | 3.081622021 | 2.25E-03 | 2.28E-02 |
| ARF1      | 1.828444354  | 0.194001623 | 13.76600925 | 4.15247026  | 4.27E-05 | 1.48E-03 |
| TXNDC12   | -0.57783664  | 0.194211364 | 11.22442321 | 3.469704624 | 5.96E-04 | 9.17E-03 |
| MRPL44    | 1.229217091  | 0.194437013 | 9.539373701 | 3.992353292 | 8.19E-05 | 2.27E-03 |
| MED6      | -0.332979862 | 0.195311364 | 8.770792045 | 3.544635756 | 4.54E-04 | 7.61E-03 |
| FASTK     | -1.532412869 | 0.19534026  | 10.8493461  | 3.162015034 | 1.72E-03 | 1.89E-02 |
| ZDHHC16   | -0.518750323 | 0.19556526  | 9.675296266 | 3.48792186  | 5.58E-04 | 8.76E-03 |
| CLP1      | 1.86382933   | 0.195578896 | 8.178965422 | 4.161753141 | 4.11E-05 | 1.45E-03 |
| RBM42     | -2.256936617 | 0.195980195 | 10.81498425 | 2.90836649  | 3.90E-03 | 3.34E-02 |
| STX5      | 4.25521429   | 0.19630974  | 10.38488019 | 4.751888241 | 3.10E-06 | 2.51E-04 |
| EXT2      | -0.329752847 | 0.196457143 | 10.56603247 | 3.545613558 | 4.53E-04 | 7.59E-03 |
| C15orf23  | -2.701543055 | 0.196652922 | 8.793502435 | 2.74181593  | 6.47E-03 | 4.73E-02 |
| SNX3      | -2.030250753 | 0.196732143 | 11.60119529 | 2.989901592 | 3.02E-03 | 2.79E-02 |
| PSMD13    | -0.286877011 | 0.197078896 | 10.62284659 | 3.558581722 | 4.32E-04 | 7.36E-03 |
| NOSIP     | -2.428500798 | 0.197275    | 9.681066071 | 2.845193086 | 4.74E-03 | 3.81E-02 |
| FAM165B   | -2.01393791  | 0.197436039 | 8.005314773 | 2.995688328 | 2.96E-03 | 2.76E-02 |
| RFC2      | -1.353418075 | 0.197528247 | 9.549163474 | 3.221789892 | 1.41E-03 | 1.66E-02 |
| FUCA2     | -1.41299658  | 0.197668831 | 10.24938961 | 3.202009474 | 1.51E-03 | 1.74E-02 |
| MRPL37    | -0.801794762 | 0.197969481 | 11.32964188 | 3.399838176 | 7.63E-04 | 1.08E-02 |
| CDK4      | -2.144446527 | 0.19797013  | 11.92324935 | 2.949093024 | 3.43E-03 | 3.08E-02 |
| DYNLRB1   | -1.47460735  | 0.198057468 | 11.93237289 | 3.181433676 | 1.62E-03 | 1.81E-02 |
| BCL7B     | 0.094485685  | 0.198074675 | 10.24219253 | 3.672077942 | 2.84E-04 | 5.54E-03 |
| FLAD1     | 0.206625932  | 0.198274675 | 10.487375   | 3.704846092 | 2.51E-04 | 5.04E-03 |
| NFU1      | -1.598559029 | 0.198380844 | 8.931321591 | 3.139656831 | 1.86E-03 | 1.99E-02 |
| PSMD14    | -0.396385424 | 0.198551948 | 10.18808961 | 3.525373013 | 4.87E-04 | 7.97E-03 |
| COMMD4    | -2.244664856 | 0.198599675 | 9.850568669 | 2.912835544 | 3.84E-03 | 3.31E-02 |
| SLC33A1   | 0.137145619  | 0.198672727 | 9.512619481 | 3.684574799 | 2.71E-04 | 5.35E-03 |
| SIAH2     | -2.255799661 | 0.198682143 | 10.50266185 | 2.908780812 | 3.89E-03 | 3.34E-02 |
| TRPT1     | -1.807275887 | 0.198771104 | 9.190795942 | 3.068109114 | 2.35E-03 | 2.35E-02 |
| UBE2N     | -1.221847236 | 0.198791883 | 11.03051153 | 3.26507623  | 1.22E-03 | 1.49E-02 |
| C18orf8   | -2.155158673 | 0.198973052 | 8.587393019 | 2.945237638 | 3.47E-03 | 3.09E-02 |
| ISCA2     | -2.560124652 | 0.199096429 | 8.756807955 | 2.795811463 | 5.50E-03 | 4.24E-02 |
| TMEM199   | -1.900831949 | 0.199194481 | 8.333903734 | 3.035525356 | 2.61E-03 | 2.54E-02 |
| TMEM189   | -1.151898107 | 0.199427597 | 9.998748214 | 3.287873118 | 1.13E-03 | 1.41E-02 |
| NFYC      | -0.73873878  | 0.200027273 | 10.80546688 | 3.419642585 | 7.12E-04 | 1.03E-02 |
| COX4NB    | -0.897465458 | 0.200123052 | 9.244730357 | 3.369584737 | 8.49E-04 | 1.17E-02 |
| C1orf74   | -1.690397082 | 0.200386688 | 6.759852435 | 3.108365076 | 2.06E-03 | 2.13E-02 |
| ADAM15    | -2.554025467 | 0.200461039 | 11.53533182 | 2.798117959 | 5.46E-03 | 4.22E-02 |
| GLA       | -1.888359268 | 0.200645779 | 8.8106125   | 3.039888298 | 2.57E-03 | 2.51E-02 |
| FUNDC2    | -2.591948701 | 0.200786688 | 10.51210568 | 2.783747322 | 5.71E-03 | 4.33E-02 |

|           |              |             |             |             |          |          |
|-----------|--------------|-------------|-------------|-------------|----------|----------|
| ZNF511    | -2.566367785 | 0.200792208 | 9.416873377 | 2.793448659 | 5.54E-03 | 4.26E-02 |
| C14orf166 | -0.543033555 | 0.200797078 | 10.92839334 | 3.480445596 | 5.73E-04 | 8.94E-03 |
| DNM2      | -1.754263483 | 0.200928571 | 11.99694935 | 3.086428917 | 2.21E-03 | 2.25E-02 |
| C17orf79  | -0.457578199 | 0.201230844 | 9.204432955 | 3.506690293 | 5.21E-04 | 8.36E-03 |
| RNF115    | -1.029254302 | 0.201545455 | 9.477073377 | 3.32749292  | 9.83E-04 | 1.29E-02 |
| COPS7B    | 0.812993773  | 0.201567857 | 9.907305357 | 3.877658136 | 1.29E-04 | 3.13E-03 |
| TMEM11    | 1.264705069  | 0.201898377 | 9.036181006 | 4.001995445 | 7.88E-05 | 2.20E-03 |
| COPSS5    | -0.920215395 | 0.202266234 | 10.08376299 | 3.362353561 | 8.71E-04 | 1.19E-02 |
| APEX2     | 0.088042338  | 0.202425649 | 9.94426737  | 3.670187043 | 2.86E-04 | 5.56E-03 |
| TMEM93    | -2.657590379 | 0.202663312 | 9.13364789  | 2.758705173 | 6.15E-03 | 4.56E-02 |
| MFJ       | 2.468869757  | 0.202680519 | 10.40332273 | 4.31773284  | 2.13E-05 | 9.15E-04 |
| SNRPB2    | -1.010943433 | 0.202722078 | 10.28771818 | 3.333370676 | 9.63E-04 | 1.27E-02 |
| ZNF14     | -2.460380023 | 0.203149675 | 8.031039123 | 2.833307746 | 4.91E-03 | 3.91E-02 |
| MCRS1     | 0.572805638  | 0.203209416 | 10.34074886 | 3.810056492 | 1.68E-04 | 3.80E-03 |
| PIGC      | -0.107722341 | 0.203217208 | 9.945887825 | 3.612306061 | 3.54E-04 | 6.40E-03 |
| LRPAP1    | -2.647109587 | 0.203234091 | 11.25193977 | 2.762718031 | 6.08E-03 | 4.53E-02 |
| BPNT1     | -2.352030419 | 0.203780844 | 9.445993669 | 2.873513287 | 4.34E-03 | 3.60E-02 |
| MKKS      | -0.829130288 | 0.203803247 | 9.795856818 | 3.3912195   | 7.87E-04 | 1.11E-02 |
| PAQR3     | -2.542257097 | 0.203877597 | 8.090066071 | 2.802563252 | 5.39E-03 | 4.18E-02 |
| DNAJC9    | -0.73015058  | 0.203960065 | 9.520828084 | 3.422331739 | 7.05E-04 | 1.02E-02 |
| TUSC2     | -0.392776062 | 0.204080844 | 9.625341071 | 3.526472141 | 4.85E-04 | 7.96E-03 |
| UFC1      | -1.652372857 | 0.204297078 | 11.02359594 | 3.121356608 | 1.97E-03 | 2.07E-02 |
| SNORA5C   | -1.942555927 | 0.204402597 | 0.512623377 | 3.020887279 | 2.73E-03 | 2.61E-02 |
| MTCH1     | -0.60019995  | 0.204428247 | 12.36212516 | 3.462786625 | 6.10E-04 | 9.31E-03 |
| ORAI1     | -1.243566615 | 0.204555844 | 9.447999351 | 3.257967551 | 1.25E-03 | 1.51E-02 |
| NANS      | -1.648345056 | 0.204655519 | 9.271029058 | 3.1227298   | 1.96E-03 | 2.07E-02 |
| TMEM216   | -1.41160084  | 0.204848052 | 8.641994156 | 3.202474172 | 1.51E-03 | 1.74E-02 |
| GUK1      | -2.67864729  | 0.20495     | 12.06489903 | 2.750626148 | 6.30E-03 | 4.64E-02 |
| PDIA3P    | -1.604748184 | 0.205448377 | 11.72677029 | 3.137557198 | 1.87E-03 | 2.00E-02 |
| PFDN1     | 0.524516526  | 0.205549026 | 10.39660438 | 3.796333839 | 1.77E-04 | 3.94E-03 |
| C7orf36   | -1.742276259 | 0.205756818 | 8.015488799 | 3.090557289 | 2.18E-03 | 2.22E-02 |
| JUND      | -2.642477988 | 0.205759416 | 12.74901672 | 2.764489603 | 6.05E-03 | 4.52E-02 |
| HDGF      | 1.852999196  | 0.205807792 | 13.8110026  | 4.158913925 | 4.15E-05 | 1.46E-03 |
| PDSS1     | -1.853443158 | 0.205882792 | 7.276506331 | 3.052070782 | 2.47E-03 | 2.44E-02 |
| FEN1      | -2.20073     | 0.205987987 | 9.462989448 | 2.92878266  | 3.66E-03 | 3.20E-02 |
| GPR108    | -2.59491225  | 0.205993831 | 10.4857112  | 2.782621348 | 5.73E-03 | 4.34E-02 |
| RBX1      | -2.474638161 | 0.206240584 | 9.722233279 | 2.827976658 | 4.99E-03 | 3.95E-02 |
| APH1A     | 0.915580589  | 0.206275325 | 12.63718636 | 3.90620882  | 1.15E-04 | 2.91E-03 |
| GPR89A    | -0.609340406 | 0.206583766 | 9.330038636 | 3.45995539  | 6.17E-04 | 9.34E-03 |
| PREB      | 0.731811849  | 0.206586364 | 10.42303474 | 3.854929287 | 1.41E-04 | 3.34E-03 |
| CALU      | -0.411628563 | 0.206904221 | 12.29003912 | 3.520727672 | 4.96E-04 | 8.06E-03 |
| TSSC1     | -1.650264901 | 0.20694026  | 9.456158442 | 3.122075341 | 1.97E-03 | 2.07E-02 |
| PSMA6     | -2.405648269 | 0.206975974 | 10.71647955 | 2.853684207 | 4.62E-03 | 3.74E-02 |
| SUMO3     | -1.541867162 | 0.207102922 | 11.87268263 | 3.158828434 | 1.74E-03 | 1.90E-02 |
| SF4       | 4.16391599   | 0.207176623 | 9.525006494 | 4.730539531 | 3.42E-06 | 2.69E-04 |

|           |              |             |             |             |          |          |
|-----------|--------------|-------------|-------------|-------------|----------|----------|
| ACP2      | 0.820538317  | 0.207205195 | 10.29814286 | 3.879764301 | 1.28E-04 | 3.12E-03 |
| SDF4      | -0.056435083 | 0.207484091 | 11.74565503 | 3.627551609 | 3.35E-04 | 6.20E-03 |
| DNPEP     | 1.861269826  | 0.207573377 | 10.51370552 | 4.1610823   | 4.12E-05 | 1.45E-03 |
| TTC9C     | 1.224059312  | 0.207574026 | 8.741808442 | 3.990950172 | 8.24E-05 | 2.28E-03 |
| TMEM70    | -1.722770374 | 0.207952922 | 8.940383604 | 3.097264039 | 2.13E-03 | 2.19E-02 |
| SSNA1     | -2.235603396 | 0.208044481 | 9.730785877 | 2.916131338 | 3.80E-03 | 3.28E-02 |
| NUDCD2    | -2.508626352 | 0.208443831 | 8.860561526 | 2.815229969 | 5.19E-03 | 4.07E-02 |
| CHMP4B    | 1.34042609   | 0.208824026 | 11.77491461 | 4.022499632 | 7.25E-05 | 2.09E-03 |
| RQCD1     | 0.652941388  | 0.208914935 | 8.553112013 | 3.832730894 | 1.54E-04 | 3.58E-03 |
| CD63      | -2.17642098  | 0.209283766 | 13.11929708 | 2.937571028 | 3.56E-03 | 3.15E-02 |
| ATP5F1    | -1.366017642 | 0.209417857 | 11.69132971 | 3.217616219 | 1.43E-03 | 1.68E-02 |
| NUDT16L1  | -2.302378221 | 0.209425325 | 9.687276299 | 2.891761046 | 4.10E-03 | 3.47E-02 |
| BUD31     | -0.951390169 | 0.209569156 | 10.68366445 | 3.352421043 | 9.01E-04 | 1.21E-02 |
| POLR1C    | -0.984846232 | 0.210281494 | 9.602948539 | 3.341731252 | 9.35E-04 | 1.24E-02 |
| GTF2A2    | -2.131869978 | 0.210293831 | 9.808637825 | 2.953613366 | 3.38E-03 | 3.05E-02 |
| PFN1      | -0.714128204 | 0.210517208 | 13.9354099  | 3.427343485 | 6.93E-04 | 1.01E-02 |
| ALAS1     | 2.881735692  | 0.210795455 | 10.31384188 | 4.421374127 | 1.36E-05 | 6.82E-04 |
| HSBP1     | -2.192677365 | 0.21095974  | 11.18707013 | 2.931696659 | 3.62E-03 | 3.18E-02 |
| C12orf32  | -2.227080019 | 0.211129221 | 9.977216558 | 2.919228217 | 3.77E-03 | 3.26E-02 |
| PHF11     | -2.101428535 | 0.211253571 | 8.827315097 | 2.964527915 | 3.27E-03 | 2.97E-02 |
| MRPS22    | 0.122225398  | 0.21191526  | 9.519241396 | 3.680208454 | 2.75E-04 | 5.42E-03 |
| TIMM17A   | -0.1676022   | 0.212095779 | 10.09692646 | 3.594431397 | 3.79E-04 | 6.71E-03 |
| ALG14     | -0.941225703 | 0.212097403 | 7.46805     | 3.355662513 | 8.91E-04 | 1.20E-02 |
| DHRS7B    | -1.321340591 | 0.212704545 | 8.45741461  | 3.232393047 | 1.36E-03 | 1.62E-02 |
| BOD1      | -1.423020243 | 0.212825974 | 10.05068701 | 3.198670345 | 1.52E-03 | 1.75E-02 |
| DECR1     | -2.422760164 | 0.212853896 | 9.452641883 | 2.847328339 | 4.71E-03 | 3.79E-02 |
| LSM3      | -1.559453671 | 0.213205519 | 10.38069237 | 3.152892835 | 1.78E-03 | 1.93E-02 |
| PPIA      | -0.880217289 | 0.213227273 | 12.43921169 | 3.375057583 | 8.33E-04 | 1.15E-02 |
| NOMO1     | -2.203967013 | 0.213254545 | 11.60472662 | 2.927610514 | 3.67E-03 | 3.21E-02 |
| TTC13     | -0.861656819 | 0.213380844 | 8.377473539 | 3.380937657 | 8.16E-04 | 1.13E-02 |
| SLC25A3   | -0.500481396 | 0.213461364 | 13.0328599  | 3.493536737 | 5.47E-04 | 8.65E-03 |
| SOAT1     | -2.512506053 | 0.213564935 | 8.755994156 | 2.813771474 | 5.21E-03 | 4.08E-02 |
| RNF25     | 2.701576913  | 0.213877273 | 9.289879545 | 4.376414345 | 1.66E-05 | 7.87E-04 |
| HARB11    | -0.142323102 | 0.213904221 | 6.101963149 | 3.601987341 | 3.68E-04 | 6.60E-03 |
| GPR180    | -1.516195018 | 0.213923377 | 8.339972727 | 3.167474333 | 1.69E-03 | 1.87E-02 |
| C4orf27   | -1.238985038 | 0.21397013  | 8.151611688 | 3.259468286 | 1.24E-03 | 1.50E-02 |
| NOPI6     | -2.360471291 | 0.213974351 | 8.381670942 | 2.87040026  | 4.38E-03 | 3.62E-02 |
| AGTRAP    | -1.53226234  | 0.214014935 | 10.44871916 | 3.162065746 | 1.72E-03 | 1.89E-02 |
| CHCHD3    | 0.824019468  | 0.214306169 | 10.10107841 | 3.880735765 | 1.27E-04 | 3.11E-03 |
| CHID1     | -0.01409809  | 0.214368506 | 10.50924399 | 3.640092581 | 3.20E-04 | 6.03E-03 |
| ABCB8     | -0.711851855 | 0.21438961  | 9.405828571 | 3.42805497  | 6.91E-04 | 1.01E-02 |
| LOC401397 | -2.156809617 | 0.214407792 | 9.253370779 | 2.944643026 | 3.48E-03 | 3.10E-02 |
| RRAGC     | -2.105181718 | 0.214497403 | 8.42171039  | 2.963184288 | 3.28E-03 | 2.98E-02 |
| COQ6      | 0.073324003  | 0.21463539  | 8.434431981 | 3.665864383 | 2.90E-04 | 5.63E-03 |
| ANAPC10   | -1.253839115 | 0.214640909 | 6.948552273 | 3.254600362 | 1.26E-03 | 1.52E-02 |

|           |              |             |             |             |          |          |
|-----------|--------------|-------------|-------------|-------------|----------|----------|
| C15orf24  | -1.176073851 | 0.214869481 | 9.619230844 | 3.280010748 | 1.16E-03 | 1.43E-02 |
| UNC119    | -2.172211747 | 0.214888961 | 9.59058474  | 2.93909026  | 3.54E-03 | 3.14E-02 |
| CREB3     | -1.327549744 | 0.214956494 | 10.18169578 | 3.230343155 | 1.37E-03 | 1.62E-02 |
| TRIAP1    | -0.382783852 | 0.215205519 | 8.869443669 | 3.52951334  | 4.80E-04 | 7.90E-03 |
| DTD1      | -2.154268638 | 0.215538636 | 9.142262175 | 2.94555815  | 3.47E-03 | 3.09E-02 |
| POP5      | -1.815329875 | 0.215587013 | 8.571657792 | 3.065316863 | 2.37E-03 | 2.37E-02 |
| LOC653566 | -0.599628263 | 0.215684416 | 11.03199545 | 3.462963633 | 6.10E-04 | 9.31E-03 |
| EIF4E2    | 3.082805515  | 0.21595487  | 10.39626899 | 4.471084085 | 1.10E-05 | 5.89E-04 |
| CKAP2     | -2.587254967 | 0.216045779 | 9.861449513 | 2.785529781 | 5.68E-03 | 4.31E-02 |
| CAMTA1    | -1.9911906   | 0.216103247 | 9.800583442 | 3.003740074 | 2.89E-03 | 2.71E-02 |
| INPP1     | -2.503714717 | 0.216183442 | 7.79098263  | 2.817075373 | 5.16E-03 | 4.05E-02 |
| PRDX6     | 0.736681904  | 0.216608442 | 13.02986266 | 3.856296192 | 1.40E-04 | 3.33E-03 |
| SAMD1     | -1.039493236 | 0.216725649 | 10.21022581 | 3.324202037 | 9.94E-04 | 1.29E-02 |
| TOE1      | -0.691755301 | 0.216784091 | 8.529384903 | 3.434330349 | 6.76E-04 | 9.94E-03 |
| C14orf147 | -1.504926751 | 0.216930844 | 10.12768425 | 3.171262317 | 1.67E-03 | 1.85E-02 |
| PDZD11    | -0.954786096 | 0.217038961 | 9.883841558 | 3.351337428 | 9.05E-04 | 1.21E-02 |
| TPI1      | -2.076790099 | 0.21739026  | 13.37604838 | 2.973334185 | 3.18E-03 | 2.91E-02 |
| HSPB11    | -2.669684422 | 0.217399026 | 8.842203409 | 2.754067735 | 6.24E-03 | 4.61E-02 |
| BSCL2     | -0.684179056 | 0.217512338 | 11.19484448 | 3.436693372 | 6.70E-04 | 9.88E-03 |
| TALDO1    | -0.746156604 | 0.217632143 | 11.45651997 | 3.417318327 | 7.18E-04 | 1.04E-02 |
| ACBD6     | 1.474254129  | 0.21774513  | 9.412501786 | 4.05851117  | 6.27E-05 | 1.87E-03 |
| MRPS30    | 0.018317249  | 0.21778961  | 9.435916234 | 3.649667938 | 3.08E-04 | 5.85E-03 |
| ZNF410    | 1.758406839  | 0.217873052 | 9.837079383 | 4.13404196  | 4.60E-05 | 1.56E-03 |
| GLT25D1   | -1.178667877 | 0.21804513  | 11.35412127 | 3.279166084 | 1.16E-03 | 1.43E-02 |
| FAM119A   | -1.790973877 | 0.218309416 | 8.323693019 | 3.073753601 | 2.30E-03 | 2.32E-02 |
| THYN1     | -2.449076262 | 0.218400649 | 9.48576526  | 2.837527455 | 4.85E-03 | 3.87E-02 |
| HIFX      | -2.18565366  | 0.218835714 | 12.18639123 | 2.93423609  | 3.60E-03 | 3.17E-02 |
| NEDD8     | -1.454005982 | 0.218896104 | 10.81772273 | 3.188327594 | 1.58E-03 | 1.79E-02 |
| TMEM219   | -0.766284203 | 0.218914286 | 10.9999474  | 3.411004289 | 7.34E-04 | 1.05E-02 |
| TMEM183A  | -0.082847804 | 0.219010714 | 10.59357094 | 3.619707557 | 3.45E-04 | 6.29E-03 |
| DPH2      | -0.48979818  | 0.219103571 | 9.855468019 | 3.49681633  | 5.40E-04 | 8.60E-03 |
| PSMA1     | 0.757749441  | 0.219368831 | 11.10030455 | 3.86220429  | 1.37E-04 | 3.27E-03 |
| SH3BGR13  | -1.647565022 | 0.219420455 | 12.27172062 | 3.12299567  | 1.96E-03 | 2.06E-02 |
| C1orf43   | 0.580583261  | 0.219426299 | 12.37943458 | 3.812262524 | 1.66E-04 | 3.79E-03 |
| DPP3      | 0.549266352  | 0.219518831 | 10.62998799 | 3.803372779 | 1.72E-04 | 3.86E-03 |
| TRIT1     | -1.986078384 | 0.219548052 | 9.116111688 | 3.005546825 | 2.87E-03 | 2.70E-02 |
| DOM3Z     | -1.84947535  | 0.219552273 | 9.212998864 | 3.053452289 | 2.46E-03 | 2.43E-02 |
| ATP5C1    | -1.155224153 | 0.21962987  | 12.36133961 | 3.286792468 | 1.13E-03 | 1.41E-02 |
| FKBP3     | -1.16441628  | 0.21963539  | 10.02562354 | 3.283804177 | 1.14E-03 | 1.42E-02 |
| GTF2H4    | 0.928405316  | 0.21973539  | 9.413364448 | 3.909764803 | 1.14E-04 | 2.89E-03 |
| PIGU      | 0.463747317  | 0.219865909 | 9.957223214 | 3.779000405 | 1.89E-04 | 4.13E-03 |
| MRPS36    | -2.092186861 | 0.220026948 | 7.980062825 | 2.96783396  | 3.23E-03 | 2.95E-02 |
| CDC123    | -0.213593436 | 0.22005     | 10.48276656 | 3.580647104 | 3.98E-04 | 6.95E-03 |
| SERP1     | 2.536864491  | 0.220280844 | 12.61992614 | 4.334951289 | 1.98E-05 | 8.85E-04 |
| BCAS2     | 0.069615306  | 0.220498701 | 9.538132468 | 3.664774433 | 2.92E-04 | 5.64E-03 |

|          |              |             |             |             |          |          |
|----------|--------------|-------------|-------------|-------------|----------|----------|
| ADRM1    | 1.283288125  | 0.220857792 | 11.30808734 | 4.007036189 | 7.72E-05 | 2.19E-03 |
| CREM     | -0.759608956 | 0.220871104 | 8.804201136 | 3.413099514 | 7.28E-04 | 1.05E-02 |
| POLE4    | -2.469643567 | 0.220887662 | 8.776889935 | 2.829845209 | 4.96E-03 | 3.93E-02 |
| MAD2L1BP | -0.492524249 | 0.220949675 | 8.851879383 | 3.495979735 | 5.42E-04 | 8.60E-03 |
| CCDC123  | -1.666788855 | 0.220966883 | 9.263389935 | 3.116437142 | 2.00E-03 | 2.09E-02 |
| HPRT1    | -2.72582496  | 0.221019805 | 9.566317695 | 2.732442829 | 6.65E-03 | 4.81E-02 |
| TSPAN17  | 0.196604945  | 0.221203247 | 10.19791396 | 3.701928657 | 2.54E-04 | 5.09E-03 |
| DCPS     | -0.709209209 | 0.221322403 | 8.297830682 | 3.428880772 | 6.89E-04 | 1.01E-02 |
| GEMIN7   | -2.081383981 | 0.221410065 | 8.512356981 | 2.971694105 | 3.20E-03 | 2.92E-02 |
| TRAIIP   | -2.439385828 | 0.221448377 | 7.677209903 | 2.84114018  | 4.80E-03 | 3.85E-02 |
| RNF7     | 1.709644678  | 0.221604545 | 10.59452955 | 4.121168309 | 4.85E-05 | 1.59E-03 |
| YARS2    | -0.539064612 | 0.221666883 | 9.105225649 | 3.481668556 | 5.71E-04 | 8.92E-03 |
| CCDC72   | -2.628666989 | 0.221712987 | 10.04614221 | 2.769765875 | 5.95E-03 | 4.46E-02 |
| EFNA4    | -2.681701609 | 0.222290909 | 8.781278571 | 2.749452406 | 6.32E-03 | 4.65E-02 |
| KLHDC3   | -1.793916533 | 0.222818182 | 11.51465325 | 3.072735441 | 2.31E-03 | 2.32E-02 |
| AP1S1    | -0.377563739 | 0.222882468 | 9.844893182 | 3.531101161 | 4.77E-04 | 7.88E-03 |
| ABCB6    | -2.488560048 | 0.222922403 | 9.14393263  | 2.822762089 | 5.07E-03 | 4.00E-02 |
| GLB1     | 0.758782395  | 0.222966234 | 11.06009416 | 3.862493758 | 1.37E-04 | 3.27E-03 |
| SRP19    | 2.006923217  | 0.223186364 | 8.951994481 | 4.199106124 | 3.51E-05 | 1.29E-03 |
| VDAC2    | -1.724446424 | 0.223233442 | 11.61479269 | 3.096688294 | 2.14E-03 | 2.19E-02 |
| ZNF684   | -2.175914785 | 0.223350974 | 6.436031981 | 2.937753767 | 3.56E-03 | 3.15E-02 |
| CHCHD8   | -2.576518594 | 0.22341526  | 10.36466542 | 2.789602886 | 5.61E-03 | 4.29E-02 |
| BRMS1    | 1.697857313  | 0.223533766 | 9.264207792 | 4.118050955 | 4.92E-05 | 1.61E-03 |
| B3GAT3   | -0.469853104 | 0.223659091 | 9.926456818 | 3.502931613 | 5.29E-04 | 8.45E-03 |
| B9D2     | -2.700030928 | 0.223853896 | 7.224489935 | 2.742398621 | 6.46E-03 | 4.72E-02 |
| COX16    | -1.22450803  | 0.223935714 | 9.681309416 | 3.264206136 | 1.22E-03 | 1.49E-02 |
| ERAL1    | -0.763249387 | 0.224107792 | 10.14104286 | 3.411957004 | 7.31E-04 | 1.05E-02 |
| ATL3     | -1.95411717  | 0.224707792 | 9.268688961 | 3.01681942  | 2.77E-03 | 2.64E-02 |
| CLTB     | -2.321529303 | 0.224954221 | 10.22201867 | 2.884735731 | 4.19E-03 | 3.52E-02 |
| RRAGB    | -1.845717536 | 0.225397403 | 8.151991558 | 3.054760141 | 2.45E-03 | 2.43E-02 |
| SELS     | -1.253612171 | 0.225491883 | 9.484944643 | 3.254674786 | 1.26E-03 | 1.52E-02 |
| MRPL53   | -2.207553865 | 0.225898052 | 9.576536039 | 2.926311171 | 3.69E-03 | 3.22E-02 |
| IFT52    | -1.034115603 | 0.226032468 | 9.843227922 | 3.325930832 | 9.88E-04 | 1.29E-02 |
| CFL1     | 1.818780071  | 0.226097078 | 14.58355633 | 4.149931724 | 4.31E-05 | 1.49E-03 |
| RAB8A    | 0.34517789   | 0.226371753 | 11.33645406 | 3.744970733 | 2.15E-04 | 4.51E-03 |
| RAN      | -0.302895828 | 0.226496104 | 12.19808961 | 3.553741779 | 4.40E-04 | 7.46E-03 |
| NUDT22   | -2.05627644  | 0.226712662 | 9.163414773 | 2.980647472 | 3.11E-03 | 2.86E-02 |
| TUBB     | -0.399678931 | 0.226823052 | 14.8986875  | 3.524369795 | 4.89E-04 | 7.99E-03 |
| SEPX1    | -2.282989751 | 0.226882792 | 8.659951136 | 2.898857048 | 4.01E-03 | 3.41E-02 |
| THOC3    | -2.111203921 | 0.227004545 | 10.48283279 | 2.961027159 | 3.31E-03 | 3.00E-02 |
| FAM36A   | -1.698138222 | 0.227078571 | 9.922330844 | 3.105713966 | 2.08E-03 | 2.14E-02 |
| BPGM     | -1.370232039 | 0.227096104 | 8.798708442 | 3.21621905  | 1.44E-03 | 1.68E-02 |
| UBE2F    | 0.523128758  | 0.227292532 | 9.331505357 | 3.795938803 | 1.77E-04 | 3.94E-03 |
| ECHS1    | -1.636203387 | 0.227294481 | 11.44366412 | 3.126865822 | 1.94E-03 | 2.05E-02 |
| MRPL1    | -0.833482515 | 0.227327273 | 8.263331169 | 3.389845406 | 7.91E-04 | 1.11E-02 |

|          |              |             |             |             |          |          |
|----------|--------------|-------------|-------------|-------------|----------|----------|
| PPPICA   | 0.767055067  | 0.227435065 | 12.33944675 | 3.864811323 | 1.36E-04 | 3.25E-03 |
| SEC22B   | 2.963634135  | 0.227436364 | 10.25617597 | 4.44168041  | 1.25E-05 | 6.43E-04 |
| TUBG1    | -0.843363101 | 0.227475974 | 9.824378896 | 3.386723973 | 7.99E-04 | 1.12E-02 |
| STOML2   | -1.248482975 | 0.227504221 | 11.07150471 | 3.256356438 | 1.25E-03 | 1.51E-02 |
| DPM1     | 1.39121077   | 0.227741234 | 9.850449838 | 4.036199066 | 6.86E-05 | 2.01E-03 |
| COX7A2L  | -0.22172679  | 0.227786364 | 11.32500097 | 3.578204345 | 4.02E-04 | 6.98E-03 |
| PPT1     | -1.529663021 | 0.228162013 | 12.10056672 | 3.162941316 | 1.72E-03 | 1.89E-02 |
| HMGB3    | -2.543517093 | 0.228491883 | 10.08423555 | 2.802087631 | 5.40E-03 | 4.18E-02 |
| BAD      | -0.235955621 | 0.228519156 | 10.10725438 | 3.573927195 | 4.08E-04 | 7.04E-03 |
| ADII     | -0.545251408 | 0.22863961  | 11.12011071 | 3.479762031 | 5.74E-04 | 8.94E-03 |
| MSRB2    | -2.249282909 | 0.228691883 | 9.188846591 | 2.91115453  | 3.86E-03 | 3.33E-02 |
| TMEM50B  | -1.322696853 | 0.228771104 | 10.02254399 | 3.231945393 | 1.36E-03 | 1.62E-02 |
| FAM98C   | -2.368732249 | 0.228952597 | 8.307803571 | 2.867350491 | 4.43E-03 | 3.63E-02 |
| NUP37    | -0.614486525 | 0.229046429 | 8.61299724  | 3.458360451 | 6.20E-04 | 9.36E-03 |
| SERF2    | -2.100646524 | 0.229062662 | 13.02147419 | 2.9648078   | 3.27E-03 | 2.97E-02 |
| CCDC107  | -1.22412554  | 0.22938961  | 8.391386364 | 3.264331225 | 1.22E-03 | 1.49E-02 |
| CCNYL1   | -0.221185094 | 0.229645455 | 8.74600974  | 3.578367084 | 4.02E-04 | 6.98E-03 |
| RHOC     | -0.876163429 | 0.229797078 | 11.98196607 | 3.376342681 | 8.29E-04 | 1.15E-02 |
| ALKBH6   | -1.951702426 | 0.229866558 | 8.526970942 | 3.017669481 | 2.76E-03 | 2.63E-02 |
| PSMB1    | -1.366671144 | 0.229969156 | 11.14591834 | 3.217399605 | 1.43E-03 | 1.68E-02 |
| SIP1     | -1.565102826 | 0.230071104 | 7.308166721 | 3.150983978 | 1.79E-03 | 1.94E-02 |
| FAM195B  | -1.933800456 | 0.230188636 | 10.76148263 | 3.023964495 | 2.71E-03 | 2.60E-02 |
| VKORC1   | -0.992382056 | 0.230231169 | 10.71811818 | 3.339319047 | 9.43E-04 | 1.25E-02 |
| C3orf1   | 2.522453932  | 0.230313312 | 11.23007159 | 4.331307109 | 2.01E-05 | 8.87E-04 |
| PRIM2    | -1.123127584 | 0.230347403 | 8.244682143 | 3.297207072 | 1.09E-03 | 1.38E-02 |
| VRK1     | -1.45580743  | 0.230369805 | 8.47725763  | 3.187725324 | 1.58E-03 | 1.79E-02 |
| SGOL2    | -2.580599043 | 0.230546429 | 8.023812825 | 2.788055533 | 5.63E-03 | 4.30E-02 |
| MGAT1    | 0.87089452   | 0.230547078 | 11.69047549 | 3.893795582 | 1.21E-04 | 3.02E-03 |
| SNRPD1   | -1.326234803 | 0.230566883 | 9.727395779 | 3.230777371 | 1.37E-03 | 1.62E-02 |
| MORN2    | -2.482101119 | 0.230577273 | 8.420563961 | 2.825182473 | 5.03E-03 | 3.97E-02 |
| MRPS23   | -2.128191505 | 0.230612338 | 9.45081526  | 2.954934274 | 3.37E-03 | 3.04E-02 |
| TMEM208  | -0.98407186  | 0.230673377 | 8.835056169 | 3.341979036 | 9.35E-04 | 1.24E-02 |
| BANF2    | -2.350033461 | 0.230793506 | 0.558394156 | 2.874249307 | 4.33E-03 | 3.60E-02 |
| UROD     | 0.454621943  | 0.23087013  | 10.07953247 | 3.776391303 | 1.91E-04 | 4.15E-03 |
| HEXIM2   | -2.24598565  | 0.231127597 | 6.702983279 | 2.912354856 | 3.85E-03 | 3.32E-02 |
| C11orf59 | -0.074512765 | 0.231156494 | 11.46457175 | 3.622184576 | 3.42E-04 | 6.28E-03 |
| GMPS     | 0.006782603  | 0.231160065 | 10.69904302 | 3.646263287 | 3.12E-04 | 5.91E-03 |
| PDIA3    | -0.452711984 | 0.231387662 | 12.97465162 | 3.508179344 | 5.19E-04 | 8.35E-03 |
| COMMD3   | -1.641573068 | 0.231623377 | 9.289692857 | 3.125037289 | 1.95E-03 | 2.05E-02 |
| TXNDC16  | -2.446914511 | 0.23188474  | 8.535803409 | 2.838333762 | 4.84E-03 | 3.87E-02 |
| RNASEH2B | -0.223657142 | 0.231925325 | 8.531750325 | 3.577624361 | 4.03E-04 | 6.99E-03 |
| UBE2A    | 0.227957725  | 0.23193539  | 10.25035016 | 3.711049508 | 2.45E-04 | 4.95E-03 |
| HSPA14   | 0.605688215  | 0.232190909 | 9.277938961 | 3.81937537  | 1.62E-04 | 3.71E-03 |
| MRPL49   | 1.29987015   | 0.232377922 | 10.89723117 | 4.011529345 | 7.58E-05 | 2.16E-03 |
| PGAM1    | -0.797378459 | 0.232543182 | 11.96862679 | 3.401228706 | 7.60E-04 | 1.08E-02 |



|          |              |             |             |             |          |          |
|----------|--------------|-------------|-------------|-------------|----------|----------|
| ABT1     | 0.058456763  | 0.23254513  | 9.861155032 | 3.661493259 | 2.95E-04 | 5.67E-03 |
| LRRC42   | 0.522140699  | 0.23283539  | 9.92945211  | 3.795657523 | 1.77E-04 | 3.94E-03 |
| SNRPD2   | -2.72319126  | 0.232855195 | 11.84433474 | 2.733460946 | 6.63E-03 | 4.80E-02 |
| RACGAP1  | -2.436344776 | 0.232880519 | 10.12650195 | 2.842273029 | 4.78E-03 | 3.84E-02 |
| ALG8     | -2.556847434 | 0.233470455 | 10.19952744 | 2.797051015 | 5.48E-03 | 4.23E-02 |
| CDC37    | -0.553221931 | 0.233638961 | 11.64151494 | 3.477304413 | 5.80E-04 | 8.99E-03 |
| EBPL     | -2.367275759 | 0.233738312 | 9.18039513  | 2.867888419 | 4.42E-03 | 3.63E-02 |
| COMMD8   | -1.582258641 | 0.234150649 | 8.239081169 | 3.145180362 | 1.82E-03 | 1.96E-02 |
| CNPY2    | 0.652547912  | 0.234194481 | 10.9296901  | 3.832619857 | 1.54E-04 | 3.58E-03 |
| DERL2    | 0.344362665  | 0.234321429 | 8.994234091 | 3.744735789 | 2.16E-04 | 4.51E-03 |
| HIGD1A   | -1.418965253 | 0.234627922 | 11.28143669 | 3.200021554 | 1.52E-03 | 1.75E-02 |
| GINS1    | -2.68930552  | 0.23532987  | 8.783383117 | 2.746528236 | 6.38E-03 | 4.68E-02 |
| MID1IP1  | -1.501716801 | 0.235395779 | 10.22010438 | 3.172340613 | 1.67E-03 | 1.85E-02 |
| PRDX1    | 0.102284565  | 0.235466883 | 12.51254773 | 3.674365454 | 2.81E-04 | 5.52E-03 |
| MRPL48   | -1.868561174 | 0.236047078 | 9.360733929 | 3.046801613 | 2.51E-03 | 2.47E-02 |
| PQBP1    | -2.405476749 | 0.23611039  | 10.21446169 | 2.853747847 | 4.61E-03 | 3.74E-02 |
| MPHOSPH6 | 0.300180771  | 0.236372078 | 7.756178247 | 3.731982643 | 2.26E-04 | 4.67E-03 |
| C17orf49 | -0.51296376  | 0.236482143 | 10.58391899 | 3.489701236 | 5.54E-04 | 8.74E-03 |
| TRAPPC2L | -2.387374208 | 0.237041558 | 8.720838961 | 2.860456974 | 4.52E-03 | 3.69E-02 |
| WDR77    | -2.262941308 | 0.237122403 | 10.40323718 | 2.906177373 | 3.92E-03 | 3.36E-02 |
| GET4     | -0.571946884 | 0.237353247 | 10.14163701 | 3.471524482 | 5.92E-04 | 9.13E-03 |
| ZNF85    | -2.151308146 | 0.237740909 | 7.374310065 | 2.94662402  | 3.46E-03 | 3.09E-02 |
| CBR1     | -1.77262047  | 0.23782987  | 10.0267513  | 3.080096758 | 2.26E-03 | 2.29E-02 |
| SNAPIN   | 0.095807743  | 0.238250649 | 9.872918831 | 3.67246581  | 2.83E-04 | 5.54E-03 |
| ST7      | 1.198840012  | 0.238276623 | 9.581219481 | 3.984083139 | 8.47E-05 | 2.32E-03 |
| EEF1E1   | -1.476099794 | 0.238661364 | 8.661041071 | 3.180933711 | 1.62E-03 | 1.82E-02 |
| B4GALT7  | 1.599884826  | 0.239337013 | 9.101517208 | 4.092058645 | 5.47E-05 | 1.70E-03 |
| CHEK2    | -1.924251852 | 0.239355195 | 8.257393182 | 3.027317114 | 2.68E-03 | 2.58E-02 |
| MED10    | -1.102943868 | 0.239391883 | 9.065810877 | 3.303740598 | 1.07E-03 | 1.36E-02 |
| C11orf84 | 1.186807305  | 0.239409091 | 9.651469481 | 3.98080297  | 8.58E-05 | 2.34E-03 |
| BANF1    | -0.610676122 | 0.239411039 | 12.33178539 | 3.459541476 | 6.18E-04 | 9.34E-03 |
| ALS2CR4  | -0.982288733 | 0.239517857 | 9.146209578 | 3.342549536 | 9.33E-04 | 1.24E-02 |
| PSMA3    | 0.569141611  | 0.239598377 | 10.03182906 | 3.809016832 | 1.68E-04 | 3.80E-03 |
| CDC34    | -0.39494619  | 0.239688961 | 9.720140584 | 3.525811328 | 4.87E-04 | 7.97E-03 |
| TBCB     | -1.40007841  | 0.239699026 | 10.81964821 | 3.206308049 | 1.49E-03 | 1.73E-02 |
| DIRC2    | -0.513892644 | 0.239720779 | 8.741885065 | 3.489415659 | 5.55E-04 | 8.74E-03 |
| POLR3K   | -1.333868682 | 0.239783117 | 8.029832468 | 3.228255772 | 1.38E-03 | 1.63E-02 |
| TXNL4A   | -0.417833774 | 0.239802597 | 9.979718182 | 3.518835021 | 4.99E-04 | 8.10E-03 |
| LSM6     | -1.235275047 | 0.23996039  | 8.240691234 | 3.260683055 | 1.24E-03 | 1.50E-02 |
| C14orf1  | 0.939827923  | 0.239986039 | 10.48781899 | 3.912929558 | 1.12E-04 | 2.86E-03 |
| TMEM179B | -1.063080066 | 0.240068831 | 11.22315519 | 3.316609489 | 1.02E-03 | 1.32E-02 |
| WBSCR22  | 0.780207106  | 0.24007013  | 10.41357208 | 3.868493246 | 1.34E-04 | 3.22E-03 |
| LIN37    | -0.473228361 | 0.240111039 | 8.089002273 | 3.501897429 | 5.30E-04 | 8.46E-03 |
| PPIE     | -0.335144611 | 0.24011461  | 9.75393263  | 3.543979687 | 4.55E-04 | 7.62E-03 |
| POLR2H   | 0.581754127  | 0.240495455 | 10.60101721 | 3.812594526 | 1.66E-04 | 3.79E-03 |

|          |              |             |             |             |          |          |
|----------|--------------|-------------|-------------|-------------|----------|----------|
| CTPS     | -2.202429771 | 0.240622403 | 9.563519643 | 2.928167216 | 3.66E-03 | 3.20E-02 |
| SDHC     | 1.167816952  | 0.240805844 | 11.13216656 | 3.97562117  | 8.76E-05 | 2.38E-03 |
| ARPC3    | 0.51999291   | 0.241038312 | 11.65402825 | 3.795046026 | 1.78E-04 | 3.94E-03 |
| NME2     | -2.001392165 | 0.241082143 | 12.78859172 | 3.000131595 | 2.92E-03 | 2.74E-02 |
| CSNK2B   | 1.191524196  | 0.241151623 | 12.15175698 | 3.982089105 | 8.53E-05 | 2.33E-03 |
| H3F3A    | -0.03585949  | 0.241157143 | 12.86039091 | 3.633651412 | 3.27E-04 | 6.10E-03 |
| MRPL39   | -1.025970515 | 0.241185714 | 8.734815584 | 3.328547719 | 9.79E-04 | 1.28E-02 |
| SDSL     | -2.57985567  | 0.241408442 | 8.078569156 | 2.788337489 | 5.63E-03 | 4.30E-02 |
| DCUN1D5  | -0.109772912 | 0.241441234 | 9.020878409 | 3.611695288 | 3.55E-04 | 6.41E-03 |
| DCTN3    | -0.961070823 | 0.241666558 | 10.18657484 | 3.34933116  | 9.11E-04 | 1.22E-02 |
| ZNF490   | -2.03870303  | 0.241837338 | 8.177308279 | 2.986899122 | 3.05E-03 | 2.82E-02 |
| COMMD7   | 1.359809355  | 0.241984091 | 10.68768295 | 4.027733297 | 7.10E-05 | 2.06E-03 |
| DERA     | -2.465475339 | 0.242120779 | 9.484938312 | 2.83140371  | 4.94E-03 | 3.92E-02 |
| C6orf108 | -2.689047604 | 0.242276948 | 10.04166964 | 2.746627469 | 6.38E-03 | 4.68E-02 |
| PL-5283  | 0.483579154  | 0.242624675 | 11.07702208 | 3.784665037 | 1.85E-04 | 4.05E-03 |
| FTSJ1    | -0.856457529 | 0.242781169 | 9.928237338 | 3.382583128 | 8.11E-04 | 1.13E-02 |
| MTCH2    | 4.736808431  | 0.243232792 | 10.79726769 | 4.863170057 | 1.85E-06 | 1.76E-04 |
| ZNF593   | -1.595487265 | 0.243272727 | 9.196196104 | 3.140698421 | 1.85E-03 | 1.99E-02 |
| OSTCL    | -2.718325519 | 0.243324351 | 2.496254383 | 2.735340961 | 6.59E-03 | 4.78E-02 |
| AKIRIN1  | -2.271355275 | 0.243387662 | 10.73145942 | 2.903107289 | 3.96E-03 | 3.38E-02 |
| NDUFV3   | 0.613206136  | 0.243423701 | 9.833685877 | 3.821503046 | 1.61E-04 | 3.68E-03 |
| CDK16    | -2.015210227 | 0.243447078 | 12.29911769 | 2.995237371 | 2.97E-03 | 2.76E-02 |
| NFKBIB   | -2.638464023 | 0.243612338 | 8.915126948 | 2.766024059 | 6.02E-03 | 4.50E-02 |
| MRPL54   | -2.385028155 | 0.243921104 | 8.547213149 | 2.861325374 | 4.51E-03 | 3.68E-02 |
| C13orf34 | -1.9782781   | 0.244086039 | 7.784117045 | 3.00830162  | 2.84E-03 | 2.69E-02 |
| AP2S1    | -0.634176981 | 0.244116234 | 10.3701224  | 3.452251502 | 6.34E-04 | 9.51E-03 |
| TRAPPC3  | -0.176154435 | 0.244178247 | 10.43748263 | 3.591871829 | 3.82E-04 | 6.75E-03 |
| TAF11    | 0.748172568  | 0.24424513  | 9.424055682 | 3.859519603 | 1.39E-04 | 3.30E-03 |
| MED26    | -0.02084543  | 0.244355519 | 9.148592045 | 3.638096548 | 3.22E-04 | 6.04E-03 |
| NUDT19   | -1.659187256 | 0.244567857 | 9.025364448 | 3.119032097 | 1.99E-03 | 2.08E-02 |
| GLRX5    | -0.609424114 | 0.244744156 | 10.47411429 | 3.459929451 | 6.17E-04 | 9.34E-03 |
| CKLF     | -2.482365169 | 0.244793831 | 8.907781981 | 2.825083563 | 5.04E-03 | 3.97E-02 |
| TMEM126A | -1.935085969 | 0.244837662 | 8.076483766 | 3.02351287  | 2.71E-03 | 2.60E-02 |
| MYL6     | -1.357243165 | 0.244898052 | 14.17591461 | 3.220523344 | 1.42E-03 | 1.66E-02 |
| STIL     | -2.678154554 | 0.244909091 | 8.882735065 | 2.750815456 | 6.30E-03 | 4.64E-02 |
| TOMM6    | -1.421431503 | 0.24522013  | 11.32554903 | 3.199199811 | 1.52E-03 | 1.75E-02 |
| C19orf63 | -1.398211098 | 0.245225    | 11.85663393 | 3.206928959 | 1.48E-03 | 1.72E-02 |
| SNX22    | -1.014382176 | 0.245399026 | 7.444491721 | 3.33226758  | 9.67E-04 | 1.27E-02 |
| CNIH     | -1.057785293 | 0.245482792 | 10.74438166 | 3.318315268 | 1.01E-03 | 1.32E-02 |
| NUDT15   | -1.060608079 | 0.245530519 | 9.312569805 | 3.317405973 | 1.02E-03 | 1.32E-02 |
| GLRX2    | -1.081353436 | 0.245771104 | 6.751491396 | 3.31071622  | 1.04E-03 | 1.33E-02 |
| CIB1     | -1.398660369 | 0.245782792 | 10.56454919 | 3.20677958  | 1.48E-03 | 1.72E-02 |
| FH       | 0.399443605  | 0.246007143 | 10.27506916 | 3.760579841 | 2.03E-04 | 4.34E-03 |
| SLC39A7  | 1.830232762  | 0.246068831 | 11.09062597 | 4.152939873 | 4.26E-05 | 1.48E-03 |
| MRPS14   | 1.867035725  | 0.246087013 | 9.028822078 | 4.162593395 | 4.09E-05 | 1.45E-03 |

|           |              |             |             |             |          |          |
|-----------|--------------|-------------|-------------|-------------|----------|----------|
| POLA2     | 0.043208347  | 0.24616461  | 9.353908279 | 3.657005108 | 3.00E-04 | 5.73E-03 |
| POLR2I    | -1.549207265 | 0.246463636 | 10.15287857 | 3.156352355 | 1.76E-03 | 1.92E-02 |
| CNIH4     | 1.518821217  | 0.246794156 | 9.645787338 | 4.070440315 | 5.97E-05 | 1.81E-03 |
| ACOT7     | -2.363226388 | 0.246836039 | 9.013395942 | 2.869383478 | 4.40E-03 | 3.62E-02 |
| C8orf38   | -0.886627462 | 0.246897727 | 8.237257955 | 3.373024594 | 8.39E-04 | 1.16E-02 |
| C13orf37  | -0.941946618 | 0.247643831 | 9.098456981 | 3.355432707 | 8.92E-04 | 1.20E-02 |
| CCDC99    | 0.268722654  | 0.247768506 | 8.458429058 | 3.722877996 | 2.34E-04 | 4.79E-03 |
| C12orf62  | -1.112116037 | 0.247928896 | 9.125115747 | 3.30077303  | 1.08E-03 | 1.37E-02 |
| C1orf151  | 0.87745516   | 0.248167208 | 9.837525812 | 3.895620283 | 1.20E-04 | 3.00E-03 |
| ZNF823    | -1.24066436  | 0.248364935 | 7.203658442 | 3.258918284 | 1.24E-03 | 1.50E-02 |
| SLC25A4   | -0.543760891 | 0.248505519 | 9.639837175 | 3.480221438 | 5.74E-04 | 8.94E-03 |
| RHEB      | 0.288673467  | 0.248929221 | 10.72363084 | 3.728654533 | 2.29E-04 | 4.72E-03 |
| PDRG1     | 0.067324136  | 0.249177597 | 9.199923864 | 3.664100932 | 2.92E-04 | 5.64E-03 |
| BRI3      | 0.24587767   | 0.249206169 | 10.53129854 | 3.716253444 | 2.40E-04 | 4.88E-03 |
| TUBA1B    | 0.524464853  | 0.249422078 | 14.90636104 | 3.796319131 | 1.77E-04 | 3.94E-03 |
| C12orf45  | -1.465807184 | 0.249596429 | 7.589916396 | 3.184380216 | 1.60E-03 | 1.80E-02 |
| ROBLD3    | -0.876170412 | 0.249719481 | 9.657935065 | 3.376340467 | 8.29E-04 | 1.15E-02 |
| DTYMK     | -0.37823367  | 0.249830844 | 9.458310877 | 3.530897422 | 4.78E-04 | 7.88E-03 |
| SDHB      | 1.274887071  | 0.249846429 | 10.82437451 | 4.004758068 | 7.79E-05 | 2.20E-03 |
| LSR       | -2.605479142 | 0.250631818 | 12.51675682 | 2.778603025 | 5.80E-03 | 4.37E-02 |
| MRPL16    | 1.999759236  | 0.250893831 | 9.611507955 | 4.197243075 | 3.54E-05 | 1.29E-03 |
| NR1H3     | -0.930989822 | 0.250916234 | 8.821529545 | 3.358923826 | 8.81E-04 | 1.19E-02 |
| SUGT1     | 0.645670454  | 0.251168831 | 9.141531818 | 3.8306786   | 1.55E-04 | 3.59E-03 |
| C7orf28B  | -1.208921321 | 0.251212013 | 9.790080682 | 3.269300009 | 1.20E-03 | 1.47E-02 |
| PGP       | -1.156443248 | 0.251278571 | 9.416160714 | 3.286396294 | 1.13E-03 | 1.42E-02 |
| PIAS2     | -0.663457665 | 0.251377273 | 8.502465909 | 3.4431487   | 6.55E-04 | 9.73E-03 |
| GPI       | -1.179083416 | 0.251443182 | 12.99797159 | 3.279030758 | 1.16E-03 | 1.43E-02 |
| PIGT      | 0.654622744  | 0.251580519 | 12.60361753 | 3.833205332 | 1.53E-04 | 3.58E-03 |
| FKBP8     | 1.940872851  | 0.251748701 | 12.89680357 | 4.181901291 | 3.78E-05 | 1.36E-03 |
| LOC152217 | -1.43513226  | 0.251907468 | 9.387458929 | 3.194631188 | 1.55E-03 | 1.77E-02 |
| C14orf109 | -0.782065382 | 0.252442857 | 8.613233766 | 3.406046157 | 7.47E-04 | 1.07E-02 |
| METRNL    | -1.759721303 | 0.252455844 | 9.479043506 | 3.08454754  | 2.22E-03 | 2.26E-02 |
| NRL       | -1.354033594 | 0.252572403 | 5.181463474 | 3.221586115 | 1.41E-03 | 1.66E-02 |
| HYI       | -1.422970327 | 0.252691558 | 8.39656461  | 3.198686981 | 1.52E-03 | 1.75E-02 |
| SLC37A1   | -2.592534471 | 0.252721104 | 8.821598864 | 2.783524798 | 5.71E-03 | 4.33E-02 |
| CHCHD6    | -1.458722818 | 0.252782792 | 7.606214773 | 3.186750409 | 1.59E-03 | 1.79E-02 |
| ASPSR1    | -0.392643013 | 0.25293961  | 9.245426948 | 3.526512651 | 4.85E-04 | 7.96E-03 |
| MRPL43    | 1.224730202  | 0.253389935 | 10.19622873 | 3.991132706 | 8.23E-05 | 2.28E-03 |
| POMP      | -0.168803892 | 0.253477273 | 10.61195162 | 3.594071848 | 3.79E-04 | 6.71E-03 |
| PHPT1     | -2.065121    | 0.253506494 | 10.41464935 | 2.977496389 | 3.14E-03 | 2.88E-02 |
| ZBTB8OS   | -0.32482823  | 0.253697727 | 7.625024838 | 3.547105264 | 4.50E-04 | 7.56E-03 |
| C2orf28   | -0.29506206  | 0.253717532 | 11.81311526 | 3.556109438 | 4.36E-04 | 7.41E-03 |
| RNF181    | 0.236721846  | 0.254138961 | 10.5656526  | 3.713595431 | 2.43E-04 | 4.92E-03 |
| CNPY3     | 0.783949173  | 0.254171753 | 11.05389562 | 3.869540261 | 1.33E-04 | 3.21E-03 |
| MAGEB18   | -2.186862317 | 0.254296104 | 0.369338961 | 2.933799246 | 3.60E-03 | 3.17E-02 |

|          |              |             |             |             |          |          |
|----------|--------------|-------------|-------------|-------------|----------|----------|
| PSMB5    | 0.374875069  | 0.254591558 | 11.2282289  | 3.753520206 | 2.08E-04 | 4.42E-03 |
| TAF10    | -0.484740068 | 0.25468961  | 11.11450195 | 3.49836811  | 5.37E-04 | 8.56E-03 |
| SELT     | 0.746220481  | 0.254758766 | 11.05495016 | 3.858972166 | 1.39E-04 | 3.30E-03 |
| DNAJC19  | 1.290449109  | 0.254811688 | 9.306794156 | 4.008977123 | 7.66E-05 | 2.18E-03 |
| AURKAIP1 | -0.08385175  | 0.254864935 | 10.86058571 | 3.619409098 | 3.45E-04 | 6.29E-03 |
| NIF3L1   | 3.868550796  | 0.254899675 | 9.638961526 | 4.660897532 | 4.70E-06 | 3.33E-04 |
| EMG1     | -2.08280506  | 0.255224026 | 9.327217857 | 2.971186587 | 3.20E-03 | 2.92E-02 |
| SSR3     | 3.215212504  | 0.255297078 | 11.88070308 | 4.503556612 | 9.50E-06 | 5.36E-04 |
| LIPT2    | -2.564580818 | 0.255594805 | 6.713718182 | 2.794125156 | 5.53E-03 | 4.25E-02 |
| MRPS28   | -0.642732786 | 0.255670455 | 8.51280276  | 3.449593959 | 6.40E-04 | 9.58E-03 |
| GMPPA    | 7.632919393  | 0.256137662 | 9.711446104 | 5.491913858 | 8.35E-08 | 1.99E-05 |
| DBF4     | -0.417507053 | 0.25618539  | 8.2410375   | 3.518934698 | 4.99E-04 | 8.10E-03 |
| MRPL55   | 0.800244248  | 0.256213636 | 9.43330487  | 3.874096577 | 1.31E-04 | 3.17E-03 |
| PSMB2    | 1.873856655  | 0.256550325 | 11.79335049 | 4.164380357 | 4.06E-05 | 1.44E-03 |
| MMACHC   | 2.035100788  | 0.256732468 | 8.127601948 | 4.206426816 | 3.41E-05 | 1.27E-03 |
| CRIP1    | 1.565461154  | 0.256835714 | 9.47998539  | 4.082890913 | 5.68E-05 | 1.75E-03 |
| TRIP13   | -2.738286308 | 0.257052597 | 9.364578896 | 2.727620711 | 6.75E-03 | 4.86E-02 |
| ASNS     | -1.815464886 | 0.257076299 | 9.652428409 | 3.065270035 | 2.37E-03 | 2.37E-02 |
| MREG     | -2.34973029  | 0.257109416 | 8.657178084 | 2.874361031 | 4.33E-03 | 3.60E-02 |
| LGMN     | -0.375197605 | 0.25713539  | 11.09067679 | 3.53182066  | 4.76E-04 | 7.87E-03 |
| TAF13    | -1.264585049 | 0.257142532 | 6.896024513 | 3.251074514 | 1.28E-03 | 1.53E-02 |
| DYNLL1   | 4.026957015  | 0.257149351 | 12.23045065 | 4.698357534 | 3.96E-06 | 2.97E-04 |
| EBNA1BP2 | 2.074091818  | 0.257206818 | 10.92509237 | 4.216538302 | 3.27E-05 | 1.23E-03 |
| COMMD10  | -0.608106927 | 0.257502922 | 8.552443019 | 3.460337582 | 6.16E-04 | 9.34E-03 |
| OAZ1     | -0.39168678  | 0.257620455 | 13.25753231 | 3.526803789 | 4.85E-04 | 7.96E-03 |
| FIBP     | 2.89930393   | 0.257656169 | 11.08123912 | 4.425736951 | 1.34E-05 | 6.71E-04 |
| MRPL21   | -0.859118086 | 0.25781039  | 9.647365584 | 3.381741207 | 8.13E-04 | 1.13E-02 |
| ERGIC3   | 1.733810455  | 0.257826623 | 12.92188214 | 4.127552765 | 4.73E-05 | 1.57E-03 |
| MAD2L2   | -2.255673993 | 0.257921429 | 9.611900974 | 2.908826603 | 3.89E-03 | 3.34E-02 |
| RPP38    | 3.848410497  | 0.257968182 | 9.280881494 | 4.656116121 | 4.80E-06 | 3.38E-04 |
| UROS     | -0.385115829 | 0.258208442 | 9.72995487  | 3.528803802 | 4.81E-04 | 7.92E-03 |
| MRPS18A  | 1.029285264  | 0.258309416 | 10.04744432 | 3.937635339 | 1.02E-04 | 2.66E-03 |
| MRS2     | 1.483401241  | 0.258427597 | 9.909340422 | 4.060962107 | 6.21E-05 | 1.86E-03 |
| HM13     | 4.633995988  | 0.258596429 | 12.13459172 | 4.839596908 | 2.06E-06 | 1.87E-04 |
| PTMA     | 4.609048326  | 0.25888961  | 14.57424935 | 4.833862054 | 2.12E-06 | 1.89E-04 |
| SPCS1    | 1.692163971  | 0.259035065 | 11.24559805 | 4.116544508 | 4.95E-05 | 1.61E-03 |
| GALK1    | -1.213610922 | 0.25967987  | 8.396637338 | 3.267768183 | 1.21E-03 | 1.48E-02 |
| MED19    | 1.943138968  | 0.259929221 | 8.699818506 | 4.182492611 | 3.77E-05 | 1.36E-03 |
| PSMA2    | 2.141681375  | 0.260010065 | 11.16671023 | 4.234015455 | 3.04E-05 | 1.17E-03 |
| MEMO1    | 3.372805026  | 0.260281818 | 8.6808      | 4.541941797 | 8.02E-06 | 4.80E-04 |
| CLIC1    | 2.235614578  | 0.260366883 | 12.6827711  | 4.258198914 | 2.74E-05 | 1.10E-03 |
| ZNF791   | -0.933466905 | 0.260441558 | 8.438669481 | 3.358134858 | 8.84E-04 | 1.20E-02 |
| CCDC159  | -1.497869594 | 0.260573701 | 7.27414789  | 3.173632527 | 1.66E-03 | 1.85E-02 |
| H2AFZ    | -1.060583544 | 0.260678571 | 11.26201591 | 3.317413877 | 1.02E-03 | 1.32E-02 |
| RNASEH2C | 0.161055974  | 0.260901948 | 9.772563961 | 3.691562243 | 2.64E-04 | 5.24E-03 |

|          |              |              |             |             |          |          |
|----------|--------------|--------------|-------------|-------------|----------|----------|
| SLC35A2  | -1.121236165 | 0.261055844  | 10.33221039 | 3.29781984  | 1.09E-03 | 1.38E-02 |
| C11orf48 | 0.611917661  | 0.261057143  | 9.521251948 | 3.821138466 | 1.61E-04 | 3.68E-03 |
| BRP44L   | -0.802488235 | 0.261575974  | 8.793054221 | 3.399619779 | 7.64E-04 | 1.08E-02 |
| MRPL51   | -1.030766798 | 0.261702922  | 10.81604107 | 3.327006981 | 9.84E-04 | 1.29E-02 |
| ILF2     | 4.644316542  | 0.261863312  | 12.49567192 | 4.841967654 | 2.04E-06 | 1.87E-04 |
| PARL     | 2.842953005  | 0.261956169  | 9.918851461 | 4.411729611 | 1.42E-05 | 7.06E-04 |
| PFDN4    | -0.936498129 | 0.262007468  | 8.992695942 | 3.357169157 | 8.86E-04 | 1.20E-02 |
| POLR2G   | 0.781214216  | 0.262060065  | 10.26154237 | 3.868775056 | 1.34E-04 | 3.22E-03 |
| RHBDD2   | -0.656614384 | 0.262288636  | 11.87224821 | 3.445278132 | 6.50E-04 | 9.67E-03 |
| PFDN2    | 1.668684862  | 0.262335065  | 9.514018182 | 4.110326777 | 5.07E-05 | 1.61E-03 |
| EIF3K    | -2.48003118  | 0.262478247  | 11.79659756 | 2.825957736 | 5.02E-03 | 3.96E-02 |
| SNRNP25  | -0.599637445 | 0.262711364  | 8.662594643 | 3.46296079  | 6.10E-04 | 9.31E-03 |
| MRPS17   | 1.849393335  | 0.26271461   | 8.390815747 | 4.157968234 | 4.17E-05 | 1.46E-03 |
| CEBPG    | -0.877671116 | 0.262795455  | 9.958152273 | 3.375864788 | 8.30E-04 | 1.15E-02 |
| PSMB6    | 1.6766665    | 0.262832792  | 10.38591899 | 4.112441412 | 5.03E-05 | 1.61E-03 |
| DDIT3    | -2.027629769 | 0.262872078  | 8.858173701 | 2.990832057 | 3.01E-03 | 2.79E-02 |
| IER3IP1  | -0.028773983 | 0.263015909  | 9.815690422 | 3.635749801 | 3.25E-04 | 6.09E-03 |
| C19orf2  | -2.392856585 | 0.263466234  | 11.12898247 | 2.85842668  | 4.55E-03 | 3.70E-02 |
| NDUFB8   | -0.020986644 | 0.263915909  | 10.2001638  | 3.638054763 | 3.22E-04 | 6.04E-03 |
| MRPS21   | -2.281881844 | 0.263992532  | 10.58972029 | 2.899262035 | 4.01E-03 | 3.41E-02 |
| SELK     | 1.161412786  | 0.264349026  | 8.925145292 | 3.973872329 | 8.82E-05 | 2.40E-03 |
| ELOVL1   | 1.348947241  | 0.264383442  | 11.05287679 | 4.024801175 | 7.19E-05 | 2.07E-03 |
| ZNF101   | 0.462404865  | 0.264597403  | 6.9314      | 3.778616677 | 1.89E-04 | 4.13E-03 |
| PSTK     | -1.568657453 | 0.264677597  | 6.380132955 | 3.149782309 | 1.79E-03 | 1.94E-02 |
| SIVA1    | -1.840705076 | 0.265173377  | 10.25688799 | 3.056503835 | 2.44E-03 | 2.42E-02 |
| PLD3     | -2.415420296 | 0.265434416  | 12.70194448 | 2.850056229 | 4.67E-03 | 3.77E-02 |
| HEBP2    | -1.66870473  | 0.265617208  | 10.35962549 | 3.115782801 | 2.01E-03 | 2.10E-02 |
| FANCE    | -0.829295631 | 0.265800649  | 7.869187987 | 3.391167307 | 7.87E-04 | 1.11E-02 |
| GTF3C6   | 1.370609227  | 0.266189286  | 9.125093994 | 4.030646722 | 7.02E-05 | 2.05E-03 |
| HSP90B1  | 3.908062714  | 0.266190584  | 13.97462256 | 4.670265587 | 4.50E-06 | 3.24E-04 |
| ZNF879   | -1.017987479 | 0.266228247  | 6.810336201 | 3.331110689 | 9.71E-04 | 1.27E-02 |
| MYNN     | 1.863062283  | 0.266538312  | 9.432252922 | 4.161552109 | 4.11E-05 | 1.45E-03 |
| ACADS    | -1.211939517 | 0.266882143  | 8.186431981 | 3.268314213 | 1.20E-03 | 1.48E-02 |
| MEA1     | 0.590383318  | 0.2671110714 | 10.80082614 | 3.81504055  | 1.65E-04 | 3.76E-03 |
| C21orf45 | 1.749678963  | 0.267393182  | 8.703681656 | 4.131740348 | 4.65E-05 | 1.56E-03 |
| EIF2B3   | 4.645231214  | 0.26760974   | 8.611491234 | 4.842177717 | 2.04E-06 | 1.87E-04 |
| DAD1     | -0.110424764 | 0.267847403  | 11.67159253 | 3.611501111 | 3.55E-04 | 6.41E-03 |
| DNAJB9   | 0.809207298  | 0.267963312  | 9.197129708 | 3.876600699 | 1.30E-04 | 3.14E-03 |
| SDHAF2   | 6.243657398  | 0.268078571  | 9.897972403 | 5.198224878 | 3.68E-07 | 5.72E-05 |
| CCDC56   | -0.827855706 | 0.268263961  | 9.989378084 | 3.391621816 | 7.86E-04 | 1.11E-02 |
| MRII     | -2.771768718 | 0.268358442  | 9.681562338 | 2.714623808 | 7.01E-03 | 5.00E-02 |
| KEAP1    | 1.094050435  | 0.268582468  | 11.07638929 | 3.955435007 | 9.49E-05 | 2.53E-03 |
| C12orf48 | -1.641927142 | 0.268678247  | 8.083828084 | 3.124916681 | 1.95E-03 | 2.05E-02 |
| MRPL41   | -1.996857964 | 0.268975     | 9.356658929 | 3.001735928 | 2.90E-03 | 2.73E-02 |
| AHCY     | 0.830364508  | 0.269095455  | 12.6261724  | 3.882505873 | 1.27E-04 | 3.10E-03 |

|           |              |             |             |             |          |          |
|-----------|--------------|-------------|-------------|-------------|----------|----------|
| C10orf35  | -0.285568761 | 0.269235714 | 7.255347727 | 3.558976732 | 4.31E-04 | 7.35E-03 |
| C13orf27  | -1.823704122 | 0.269251299 | 7.043620455 | 3.062411046 | 2.39E-03 | 2.39E-02 |
| GPX4      | -0.508692605 | 0.26935     | 11.90756656 | 3.491014086 | 5.52E-04 | 8.72E-03 |
| TBCA      | -0.441977685 | 0.269717532 | 10.21611656 | 3.51146196  | 5.12E-04 | 8.26E-03 |
| TMSB10    | -1.105862019 | 0.269749675 | 14.43730536 | 3.302796727 | 1.07E-03 | 1.36E-02 |
| GPT2      | -2.461679931 | 0.269806494 | 10.11203896 | 2.832822107 | 4.92E-03 | 3.91E-02 |
| TFPT      | 0.003068683  | 0.269844481 | 8.759120942 | 3.64516644  | 3.14E-04 | 5.92E-03 |
| C19orf60  | -0.612032335 | 0.270039286 | 9.168681981 | 3.459121163 | 6.19E-04 | 9.35E-03 |
| CHST7     | -2.70305263  | 0.270068831 | 5.727712987 | 2.741234104 | 6.48E-03 | 4.73E-02 |
| DEM1      | -0.361947395 | 0.270180195 | 7.461533604 | 3.535847326 | 4.69E-04 | 7.78E-03 |
| LHPP      | -1.440048296 | 0.27041526  | 9.285458929 | 3.192990411 | 1.55E-03 | 1.77E-02 |
| INO80C    | -1.324833795 | 0.270494805 | 7.762447403 | 3.231239948 | 1.37E-03 | 1.62E-02 |
| PKN1      | -1.615836823 | 0.270762987 | 12.28805942 | 3.133792154 | 1.89E-03 | 2.01E-02 |
| PSMC3     | 5.681698407  | 0.270772403 | 10.87913295 | 5.075449592 | 6.71E-07 | 8.39E-05 |
| C16orf61  | 0.414832087  | 0.271317532 | 8.047261364 | 3.764995507 | 2.00E-04 | 4.29E-03 |
| RDBP      | 0.911088048  | 0.271395455 | 10.83179838 | 3.904962458 | 1.16E-04 | 2.92E-03 |
| SHISA4    | -2.58152855  | 0.271624026 | 8.635881494 | 2.78770294  | 5.64E-03 | 4.30E-02 |
| ANKRD39   | 2.604463368  | 0.271978571 | 7.717797727 | 4.352009994 | 1.84E-05 | 8.46E-04 |
| B3GALNT1  | -2.243699945 | 0.272098377 | 9.641321916 | 2.913186664 | 3.84E-03 | 3.31E-02 |
| LOC729678 | -2.024908976 | 0.272111364 | 8.868610227 | 2.991797667 | 3.00E-03 | 2.78E-02 |
| PSMA5     | 1.751338157  | 0.272185065 | 10.73953409 | 4.132177979 | 4.64E-05 | 1.56E-03 |
| PSMG1     | 0.987394539  | 0.272209416 | 9.262603409 | 3.926083658 | 1.07E-04 | 2.75E-03 |
| TBCE      | 2.081487892  | 0.272351299 | 8.603382792 | 4.218453889 | 3.24E-05 | 1.23E-03 |
| RNFT1     | -0.448655453 | 0.27241461  | 7.754120292 | 3.509420189 | 5.16E-04 | 8.32E-03 |
| DONSON    | -0.875140995 | 0.272504221 | 8.057889773 | 3.376666727 | 8.28E-04 | 1.15E-02 |
| ATG4A     | 0.858389913  | 0.272505195 | 7.568762338 | 3.890315557 | 1.23E-04 | 3.06E-03 |
| MCOLN1    | 1.134958828  | 0.272681169 | 8.967437987 | 3.966640974 | 9.08E-05 | 2.44E-03 |
| QTRT1     | -1.382404641 | 0.272823701 | 9.425673539 | 3.212180373 | 1.46E-03 | 1.70E-02 |
| NDUFAB1   | 0.380196143  | 0.272907468 | 10.13924594 | 3.755050211 | 2.07E-04 | 4.41E-03 |
| ZMPSTE24  | 0.487651324  | 0.272963636 | 10.67909675 | 3.785827231 | 1.84E-04 | 4.04E-03 |
| SDHAF1    | 0.253224465  | 0.273041234 | 8.527244643 | 3.718385029 | 2.38E-04 | 4.85E-03 |
| COQ3      | -1.105160122 | 0.273092857 | 7.000916558 | 3.303023777 | 1.07E-03 | 1.36E-02 |
| CENPQ     | -0.568670921 | 0.273110065 | 7.178476461 | 3.472536331 | 5.90E-04 | 9.11E-03 |
| GRN       | 0.765990092  | 0.273142208 | 13.37708409 | 3.864513044 | 1.36E-04 | 3.25E-03 |
| MIF       | -2.224731766 | 0.273196753 | 13.98798669 | 2.920080884 | 3.76E-03 | 3.26E-02 |
| CLLU1OS   | -2.3485415   | 0.273346753 | 0.54477987  | 2.874799083 | 4.33E-03 | 3.59E-02 |
| HSPA5     | 4.924646742  | 0.273756169 | 13.58975601 | 4.905988819 | 1.51E-06 | 1.53E-04 |
| SRPRB     | 2.725820302  | 0.274531494 | 9.758804708 | 4.382488003 | 1.61E-05 | 7.72E-04 |
| COX7C     | -0.601239984 | 0.274741234 | 10.9395388  | 3.462464585 | 6.11E-04 | 9.31E-03 |
| MRPS11    | 1.912163086  | 0.274855844 | 9.57875     | 4.17440332  | 3.90E-05 | 1.40E-03 |
| ERI3      | 5.381069472  | 0.275268182 | 11.1452776  | 5.008735623 | 9.26E-07 | 1.07E-04 |
| ARG2      | -0.496415221 | 0.275671429 | 7.548967532 | 3.494785328 | 5.44E-04 | 8.62E-03 |
| MXD3      | -0.299377155 | 0.276117532 | 8.467871104 | 3.554805434 | 4.38E-04 | 7.43E-03 |
| ZNF136    | -1.026224349 | 0.276188312 | 8.128444805 | 3.328466195 | 9.79E-04 | 1.28E-02 |
| ATOX1     | 0.170094907  | 0.27670487  | 9.574745292 | 3.694200596 | 2.61E-04 | 5.20E-03 |

|           |              |             |             |             |          |          |
|-----------|--------------|-------------|-------------|-------------|----------|----------|
| CYCS      | -0.192909395 | 0.276851623 | 11.57261737 | 3.586852444 | 3.89E-04 | 6.84E-03 |
| ZNF93     | -2.642150742 | 0.276894805 | 7.84492987  | 2.764614733 | 6.04E-03 | 4.52E-02 |
| KRT10     | -0.164715529 | 0.277326299 | 9.266361201 | 3.595294961 | 3.77E-04 | 6.70E-03 |
| C4orf33   | -1.682116192 | 0.277394156 | 7.492142532 | 3.111198691 | 2.04E-03 | 2.12E-02 |
| DYNLT1    | 0.311425071  | 0.27753539  | 10.04740081 | 3.73523208  | 2.24E-04 | 4.64E-03 |
| CD99      | -2.425148992 | 0.277831169 | 10.85303182 | 2.846439989 | 4.72E-03 | 3.80E-02 |
| C1orf212  | 3.269107791  | 0.278129545 | 9.553788149 | 4.516715977 | 8.97E-06 | 5.14E-04 |
| C1orf50   | 2.17290664   | 0.278380519 | 7.74812013  | 4.24206806  | 2.94E-05 | 1.15E-03 |
| COMMD1    | 0.948850694  | 0.278406818 | 8.997207305 | 3.915427782 | 1.11E-04 | 2.84E-03 |
| ZNRD1     | -0.313601086 | 0.278420779 | 8.582872078 | 3.550503903 | 4.45E-04 | 7.50E-03 |
| BRI3BP    | -0.582429855 | 0.278562987 | 7.657594481 | 3.46828477  | 5.99E-04 | 9.20E-03 |
| LSM7      | 0.075187339  | 0.278985065 | 9.250519805 | 3.666411887 | 2.90E-04 | 5.63E-03 |
| DRAP1     | 3.407576471  | 0.279425    | 10.74430666 | 4.550373193 | 7.72E-06 | 4.68E-04 |
| TRMT112   | 0.427382053  | 0.279468831 | 11.00581948 | 3.768593192 | 1.97E-04 | 4.25E-03 |
| SPAG5     | -2.635313653 | 0.279524675 | 9.017148052 | 2.767227816 | 6.00E-03 | 4.49E-02 |
| FTL       | -0.876846752 | 0.279580195 | 15.35684789 | 3.376126095 | 8.30E-04 | 1.15E-02 |
| GALE      | -2.253391475 | 0.279773701 | 9.237081656 | 2.909658203 | 3.88E-03 | 3.34E-02 |
| CST3      | -1.049988305 | 0.279941558 | 13.35871039 | 3.320825688 | 1.01E-03 | 1.31E-02 |
| LOC388955 | 0.41280303   | 0.279978571 | 9.249358117 | 3.764413547 | 2.00E-04 | 4.29E-03 |
| CENPN     | 0.010242135  | 0.280126299 | 8.616881981 | 3.647284733 | 3.11E-04 | 5.89E-03 |
| PSMB4     | 4.278142363  | 0.280164286 | 12.37603019 | 4.757236694 | 3.02E-06 | 2.46E-04 |
| MRPL36    | -1.530045273 | 0.280380844 | 8.882486526 | 3.16281257  | 1.72E-03 | 1.89E-02 |
| C7orf50   | -0.266016377 | 0.28058474  | 10.00098653 | 3.564875533 | 4.22E-04 | 7.22E-03 |
| C6orf1    | -0.625006474 | 0.280717532 | 8.931524351 | 3.455097884 | 6.27E-04 | 9.45E-03 |
| SSSCA1    | 0.362417611  | 0.280737013 | 9.323262013 | 3.749936007 | 2.11E-04 | 4.45E-03 |
| ACN9      | -0.339339969 | 0.280906169 | 8.843763474 | 3.542707886 | 4.58E-04 | 7.62E-03 |
| FAM158A   | -1.38839017  | 0.28103961  | 7.437662013 | 3.21019273  | 1.47E-03 | 1.71E-02 |
| TSPAN15   | -1.628697359 | 0.281327597 | 10.05963847 | 3.129420168 | 1.92E-03 | 2.04E-02 |
| MRPS24    | 1.779344484  | 0.28143539  | 10.09796964 | 4.139558737 | 4.50E-05 | 1.53E-03 |
| CTSC      | -1.877869854 | 0.281515909 | 11.21281899 | 3.043552944 | 2.54E-03 | 2.49E-02 |
| RPL37A    | -2.343387169 | 0.281812338 | 14.74320942 | 2.87669765  | 4.30E-03 | 3.58E-02 |
| ORMDL2    | 0.083408722  | 0.281881818 | 9.563928571 | 3.668826688 | 2.87E-04 | 5.58E-03 |
| SERPINH1  | -0.206925739 | 0.282032143 | 12.96104919 | 3.582648531 | 3.95E-04 | 6.91E-03 |
| SF3B5     | 0.558057469  | 0.282040909 | 10.57040032 | 3.805870162 | 1.71E-04 | 3.84E-03 |
| C19orf70  | -1.492006882 | 0.28213474  | 9.378151786 | 3.175600314 | 1.65E-03 | 1.84E-02 |
| HN1       | -1.570828055 | 0.282180519 | 10.4883     | 3.149048311 | 1.80E-03 | 1.95E-02 |
| COX17     | -0.15875784  | 0.282280195 | 8.445021916 | 3.597076638 | 3.75E-04 | 6.67E-03 |
| SLC35B1   | 2.55591546   | 0.282717208 | 9.662614448 | 4.33976481  | 1.94E-05 | 8.76E-04 |
| FKBP2     | 1.772978597  | 0.282729221 | 10.25726396 | 4.137882108 | 4.53E-05 | 1.54E-03 |
| C5orf34   | -1.678980518 | 0.282888312 | 6.886644156 | 3.112271048 | 2.03E-03 | 2.11E-02 |
| ZFPL1     | 8.885223359  | 0.283011039 | 10.32123994 | 5.746074241 | 2.20E-08 | 7.35E-06 |
| C7orf55   | -1.672570197 | 0.283227597 | 8.597875487 | 3.114462212 | 2.02E-03 | 2.10E-02 |
| CYB5A     | -1.869573106 | 0.283231494 | 9.452654708 | 3.046448613 | 2.52E-03 | 2.47E-02 |
| MAP6D1    | -2.052405937 | 0.283531494 | 6.239854708 | 2.982025443 | 3.09E-03 | 2.85E-02 |
| RPL27     | -2.581574489 | 0.283831169 | 13.91946234 | 2.787685512 | 5.64E-03 | 4.30E-02 |

|           |              |             |             |             |          |          |
|-----------|--------------|-------------|-------------|-------------|----------|----------|
| FUNDC1    | 1.56893598   | 0.283937987 | 8.127927435 | 4.083817165 | 5.66E-05 | 1.74E-03 |
| C20orf196 | -0.685865418 | 0.284387013 | 6.920538961 | 3.436167527 | 6.71E-04 | 9.89E-03 |
| LYRM4     | -1.253358188 | 0.284435065 | 9.356098052 | 3.254758076 | 1.26E-03 | 1.52E-02 |
| SUV39H2   | 0.320069837  | 0.284503571 | 8.281975812 | 3.737728541 | 2.21E-04 | 4.61E-03 |
| YIF1B     | -0.718906705 | 0.284544481 | 10.23391899 | 3.425849495 | 6.96E-04 | 1.02E-02 |
| TMEM223   | 1.065937799  | 0.284869156 | 9.295873539 | 3.947717574 | 9.79E-05 | 2.58E-03 |
| NDUFAF2   | -1.433271738 | 0.284944805 | 7.036460065 | 3.195251951 | 1.54E-03 | 1.76E-02 |
| TCEB1     | 1.53447119   | 0.285065909 | 9.331570617 | 4.074621889 | 5.87E-05 | 1.79E-03 |
| C1orf85   | 1.258158221  | 0.285080844 | 10.74397029 | 4.000218223 | 7.94E-05 | 2.21E-03 |
| ZNHIT1    | 1.479442502  | 0.285692208 | 11.08784351 | 4.059901539 | 6.24E-05 | 1.86E-03 |
| EXOSC1    | 1.916406339  | 0.285785065 | 8.841750325 | 4.17551226  | 3.88E-05 | 1.39E-03 |
| FAM118B   | 2.683553078  | 0.285840584 | 8.499016396 | 4.371894059 | 1.69E-05 | 7.97E-04 |
| LSMD1     | -0.796812067 | 0.28585487  | 9.992017695 | 3.401407003 | 7.59E-04 | 1.08E-02 |
| H2AFX     | -1.150102056 | 0.286103247 | 11.36361721 | 3.288456527 | 1.12E-03 | 1.41E-02 |
| SKA3      | -2.211900101 | 0.286216234 | 8.122380844 | 2.92473601  | 3.70E-03 | 3.22E-02 |
| WDR53     | 1.318412334  | 0.286247403 | 7.49066461  | 4.016548297 | 7.43E-05 | 2.13E-03 |
| SCAND1    | 1.699008715  | 0.286416558 | 10.65420893 | 4.118355554 | 4.91E-05 | 1.61E-03 |
| SLC39A3   | 3.830441626  | 0.286962987 | 9.118369156 | 4.651846636 | 4.90E-06 | 3.42E-04 |
| TMEM106C  | -0.495840328 | 0.286967208 | 10.99135244 | 3.494961826 | 5.44E-04 | 8.62E-03 |
| ATP6V0E1  | 0.842885834  | 0.287372078 | 11.62681786 | 3.885996873 | 1.25E-04 | 3.08E-03 |
| HYLS1     | -2.076761755 | 0.287473377 | 7.732974351 | 2.973344301 | 3.18E-03 | 2.91E-02 |
| BLVRA     | -0.312969258 | 0.287475    | 9.008979708 | 3.550695079 | 4.44E-04 | 7.50E-03 |
| PHYH      | -2.032827543 | 0.287706494 | 8.940908442 | 2.988986549 | 3.03E-03 | 2.80E-02 |
| RPN1      | 7.898194239  | 0.287742857 | 13.47504675 | 5.546537195 | 6.29E-08 | 1.68E-05 |
| S100A11   | -2.627912784 | 0.287923052 | 13.49494464 | 2.770053733 | 5.95E-03 | 4.46E-02 |
| GCSH      | -2.512101561 | 0.287978571 | 4.308074351 | 2.813923568 | 5.21E-03 | 4.08E-02 |
| C19orf50  | 4.652069007  | 0.288039935 | 10.84655114 | 4.843747831 | 2.02E-06 | 1.87E-04 |
| LARP6     | -1.628804948 | 0.288231494 | 8.726228084 | 3.129383569 | 1.92E-03 | 2.04E-02 |
| SERTAD1   | -1.917917256 | 0.288313312 | 8.284016396 | 3.029539335 | 2.66E-03 | 2.57E-02 |
| NHP2      | 0.530967844  | 0.288399351 | 10.98309448 | 3.798169758 | 1.76E-04 | 3.92E-03 |
| EBP       | -2.039311915 | 0.28841461  | 9.598648864 | 2.98668272  | 3.05E-03 | 2.82E-02 |
| HYOU1     | 2.204366469  | 0.288425649 | 12.26719205 | 4.250167491 | 2.84E-05 | 1.13E-03 |
| PDIA5     | -1.774003565 | 0.288541883 | 9.728394318 | 3.07961917  | 2.26E-03 | 2.29E-02 |
| SEC61B    | 2.050768116  | 0.288701299 | 10.3032526  | 4.210492389 | 3.35E-05 | 1.25E-03 |
| MAPK13    | -2.512527417 | 0.289144805 | 9.231557468 | 2.813763441 | 5.21E-03 | 4.08E-02 |
| E2F8      | -2.623011238 | 0.289380519 | 8.074752597 | 2.771923812 | 5.91E-03 | 4.44E-02 |
| TOMM5     | 1.265251654  | 0.289411039 | 10.58471851 | 4.00214379  | 7.87E-05 | 2.20E-03 |
| RPN2      | 7.837028095  | 0.289650325 | 13.00971737 | 5.533981223 | 6.71E-08 | 1.70E-05 |
| TMEM206   | 0.025541925  | 0.289678571 | 7.754515909 | 3.65179895  | 3.06E-04 | 5.82E-03 |
| ZNF20     | -0.094287321 | 0.290246753 | 7.498118831 | 3.616305416 | 3.49E-04 | 6.34E-03 |
| IMPA2     | -1.713024202 | 0.290294156 | 9.336252922 | 3.100609991 | 2.11E-03 | 2.17E-02 |
| ARF5      | 2.571392643  | 0.290484416 | 11.53840519 | 4.343671902 | 1.91E-05 | 8.66E-04 |
| FAM58A    | 0.796245215  | 0.290531169 | 8.228368831 | 3.872978843 | 1.31E-04 | 3.17E-03 |
| PRKACA    | 2.54204364   | 0.290818182 | 11.43303701 | 4.336260347 | 1.97E-05 | 8.84E-04 |
| C17orf53  | -1.079825501 | 0.290834091 | 7.530038474 | 3.311209361 | 1.04E-03 | 1.33E-02 |



|          |              |             |             |             |          |          |
|----------|--------------|-------------|-------------|-------------|----------|----------|
| BNIP1    | 2.424258762  | 0.291119481 | 7.272335714 | 4.306402947 | 2.24E-05 | 9.42E-04 |
| CRELD2   | -0.775585981 | 0.291203571 | 8.617192045 | 3.408082663 | 7.41E-04 | 1.06E-02 |
| TMEM180  | -2.300525977 | 0.291203896 | 6.716474026 | 2.892439661 | 4.10E-03 | 3.46E-02 |
| TMEM117  | -2.368973411 | 0.291308442 | 6.997537987 | 2.867261413 | 4.43E-03 | 3.63E-02 |
| MRPL17   | 2.926968711  | 0.291541558 | 9.566938961 | 4.432599484 | 1.30E-05 | 6.56E-04 |
| ATP5H    | -0.194515342 | 0.291680195 | 10.53076672 | 3.586371003 | 3.90E-04 | 6.84E-03 |
| SOD1     | 1.728596535  | 0.291978247 | 11.60798003 | 4.126176023 | 4.75E-05 | 1.58E-03 |
| OST4     | 0.291421518  | 0.292062987 | 12.72455487 | 3.729449562 | 2.28E-04 | 4.71E-03 |
| CASP6    | 0.45007721   | 0.292380195 | 8.640695942 | 3.775091275 | 1.92E-04 | 4.17E-03 |
| MED8     | 6.106976443  | 0.292787013 | 9.64969026  | 5.16858761  | 4.26E-07 | 6.33E-05 |
| CDC6     | -1.632216714 | 0.292858766 | 8.197443019 | 3.128222754 | 1.93E-03 | 2.04E-02 |
| PSMA7    | 2.875514063  | 0.293229221 | 11.60224838 | 4.419828168 | 1.37E-05 | 6.85E-04 |
| ACOT6    | -2.539748277 | 0.293252922 | 1.570861526 | 2.80351005  | 5.38E-03 | 4.17E-02 |
| TSSK6    | -1.584345765 | 0.293298377 | 5.659574513 | 3.144473629 | 1.83E-03 | 1.97E-02 |
| DPM3     | -2.584245399 | 0.293836039 | 9.320195292 | 2.786672104 | 5.66E-03 | 4.31E-02 |
| LYPLA1   | 2.651858815  | 0.295013636 | 10.83753279 | 4.363935321 | 1.75E-05 | 8.19E-04 |
| PPCS     | 2.248664772  | 0.295262338 | 10.32307857 | 4.261549124 | 2.70E-05 | 1.09E-03 |
| ETV2     | -2.223298265 | 0.295275    | 4.778529708 | 2.920601283 | 3.75E-03 | 3.25E-02 |
| GPX1     | 0.635118222  | 0.295382468 | 12.89026656 | 3.827698355 | 1.57E-04 | 3.62E-03 |
| ACTL6A   | 4.123366359  | 0.296180844 | 10.76895666 | 4.72103103  | 3.57E-06 | 2.76E-04 |
| NDUFB6   | -0.034177459 | 0.296191883 | 9.660465422 | 3.63414965  | 3.27E-04 | 6.10E-03 |
| FBXO22OS | -1.445052316 | 0.296249026 | 5.119364773 | 3.191319459 | 1.56E-03 | 1.78E-02 |
| STXBP2   | 0.796008229  | 0.296474351 | 10.97683263 | 3.872912596 | 1.31E-04 | 3.17E-03 |
| SAC3D1   | 2.158796147  | 0.297002597 | 8.514112338 | 4.238430818 | 2.98E-05 | 1.16E-03 |
| BOLA1    | -0.734401696 | 0.297125325 | 8.190300325 | 3.421000865 | 7.08E-04 | 1.03E-02 |
| FAU      | 0.507813155  | 0.297212338 | 12.73898344 | 3.791576641 | 1.80E-04 | 3.97E-03 |
| ARL2     | 0.420159352  | 0.29741461  | 10.58792808 | 3.76652305  | 1.98E-04 | 4.27E-03 |
| OIP5     | -1.462983774 | 0.297425974 | 6.763335065 | 3.185325032 | 1.59E-03 | 1.80E-02 |
| COX7B    | -2.019883374 | 0.29765974  | 11.37489091 | 2.993580484 | 2.98E-03 | 2.77E-02 |
| CSRP3    | -1.239105331 | 0.297778896 | 0.485546591 | 3.259428892 | 1.24E-03 | 1.50E-02 |
| GOT1     | 1.731775032  | 0.297853247 | 9.933444156 | 4.127015358 | 4.74E-05 | 1.57E-03 |
| NDUFA12  | 3.006589379  | 0.298391234 | 9.909907955 | 4.452298515 | 1.19E-05 | 6.23E-04 |
| RAB11B   | 2.44754159   | 0.298517857 | 12.14435828 | 4.312319382 | 2.18E-05 | 9.30E-04 |
| ATP5EP2  | -2.326838482 | 0.298599026 | 4.989530032 | 2.882785265 | 4.22E-03 | 3.54E-02 |
| HAUS1    | -0.45887203  | 0.298611688 | 8.007272727 | 3.506294286 | 5.22E-04 | 8.36E-03 |
| TOR3A    | 4.656023532  | 0.298762013 | 9.816925162 | 4.844655682 | 2.02E-06 | 1.87E-04 |
| SAAL1    | 2.721100781  | 0.298860065 | 7.449537825 | 4.381306209 | 1.62E-05 | 7.74E-04 |
| CARM1    | 2.437497222  | 0.29887987  | 11.41660682 | 4.309767871 | 2.20E-05 | 9.33E-04 |
| OSTC     | 2.800337051  | 0.299330844 | 10.57457127 | 4.401110474 | 1.49E-05 | 7.23E-04 |
| PRR11    | -1.606510505 | 0.299535714 | 7.37326461  | 3.136959101 | 1.87E-03 | 2.00E-02 |
| MAGOH    | 2.183492883  | 0.299547078 | 9.536176136 | 4.244795049 | 2.90E-05 | 1.14E-03 |
| PRAF2    | -1.153318061 | 0.299681169 | 10.60241526 | 3.287411807 | 1.13E-03 | 1.41E-02 |
| RPS6KB2  | 5.688453241  | 0.299690909 | 10.29379545 | 5.076940113 | 6.66E-07 | 8.39E-05 |
| DDOST    | 10.13306256  | 0.300121104 | 12.73825536 | 5.990690422 | 5.84E-09 | 2.46E-06 |
| SIL1     | 1.61023931   | 0.300227597 | 9.333341071 | 4.09481267  | 5.41E-05 | 1.69E-03 |

|           |              |             |             |             |          |          |
|-----------|--------------|-------------|-------------|-------------|----------|----------|
| PRELID1   | 1.564012843  | 0.300248377 | 11.2660112  | 4.082504795 | 5.69E-05 | 1.75E-03 |
| YBX1      | 1.492853886  | 0.300297727 | 13.66125925 | 4.063493522 | 6.15E-05 | 1.85E-03 |
| C6orf226  | -2.58849754  | 0.300621104 | 6.617885877 | 2.785058016 | 5.68E-03 | 4.32E-02 |
| CHCHD1    | 2.255877397  | 0.300681169 | 9.261633442 | 4.26339973  | 2.68E-05 | 1.09E-03 |
| ATP5E     | 1.348752611  | 0.300751299 | 11.34361916 | 4.024748619 | 7.19E-05 | 2.07E-03 |
| C6orf153  | 3.774512224  | 0.300807468 | 9.590884253 | 4.638535835 | 5.20E-06 | 3.58E-04 |
| FAM32A    | 4.803951633  | 0.301017857 | 10.96477711 | 4.878512433 | 1.72E-06 | 1.69E-04 |
| SRA1      | 3.340328439  | 0.301762338 | 9.717271429 | 4.534054546 | 8.30E-06 | 4.92E-04 |
| ATP1B3    | 1.111345947  | 0.302311364 | 10.76072192 | 3.960176218 | 9.31E-05 | 2.49E-03 |
| PSENNEN   | -0.463732561 | 0.302472403 | 11.05506088 | 3.504806239 | 5.25E-04 | 8.40E-03 |
| MAGOHB    | 0.545690102  | 0.302959091 | 8.533097078 | 3.802356411 | 1.73E-04 | 3.87E-03 |
| NR2C2AP   | 0.287196474  | 0.303       | 9.166913636 | 3.728227165 | 2.30E-04 | 4.73E-03 |
| ERH       | 1.642592856  | 0.303292857 | 11.02362305 | 4.103407241 | 5.22E-05 | 1.65E-03 |
| CLPP      | 1.714521317  | 0.303572078 | 9.967178896 | 4.122457398 | 4.83E-05 | 1.59E-03 |
| DPCD      | 0.510201084  | 0.303615584 | 8.856036364 | 3.792257066 | 1.80E-04 | 3.97E-03 |
| ARMC6     | 3.692039137  | 0.303666883 | 9.804382143 | 4.618847346 | 5.68E-06 | 3.84E-04 |
| C7orf68   | 1.210507536  | 0.303684416 | 8.647444156 | 3.987261442 | 8.36E-05 | 2.31E-03 |
| PCNA      | 0.544342825  | 0.303727273 | 11.31083961 | 3.801973452 | 1.73E-04 | 3.87E-03 |
| KRTCAP2   | 2.386561609  | 0.303794156 | 11.29260942 | 4.29680843  | 2.33E-05 | 9.74E-04 |
| RRM2      | -2.531264494 | 0.30382013  | 9.859748377 | 2.80670948  | 5.32E-03 | 4.14E-02 |
| POP7      | 5.264253645  | 0.303879221 | 9.422494156 | 4.982609621 | 1.05E-06 | 1.19E-04 |
| C11orf82  | -1.478196088 | 0.304086688 | 8.026060877 | 3.180231335 | 1.62E-03 | 1.82E-02 |
| IQCG      | -2.694751835 | 0.304186364 | 8.616458766 | 2.744431974 | 6.42E-03 | 4.70E-02 |
| FBXO16    | -2.703293042 | 0.304403896 | 6.719202597 | 2.741141433 | 6.48E-03 | 4.73E-02 |
| HYAL3     | -2.148611852 | 0.304778571 | 7.417104221 | 2.947594455 | 3.45E-03 | 3.08E-02 |
| POLE2     | -2.22220109  | 0.304854545 | 6.540327273 | 2.920999528 | 3.75E-03 | 3.25E-02 |
| ZFAND2A   | -0.523204215 | 0.30531526  | 7.734068669 | 3.486551712 | 5.61E-04 | 8.79E-03 |
| TMEM14A   | 2.053041036  | 0.305443182 | 9.15885211  | 4.211081909 | 3.34E-05 | 1.25E-03 |
| SUB1      | 3.010870831  | 0.305473377 | 11.85228604 | 4.453355633 | 1.18E-05 | 6.23E-04 |
| HAX1      | 5.343915428  | 0.305715584 | 11.12968636 | 5.000438575 | 9.63E-07 | 1.11E-04 |
| GTPBP8    | 3.509179977  | 0.305736039 | 7.493048539 | 4.574932642 | 6.92E-06 | 4.35E-04 |
| SSR2      | 4.155347025  | 0.305844805 | 12.70891396 | 4.728531561 | 3.45E-06 | 2.69E-04 |
| NDUFAF4   | 0.848874174  | 0.306976299 | 8.791992695 | 3.887665447 | 1.24E-04 | 3.06E-03 |
| NDUFV2    | 3.00214855   | 0.307153896 | 10.08844838 | 4.451201813 | 1.20E-05 | 6.24E-04 |
| UCHL3     | 2.219248383  | 0.307457143 | 8.377992208 | 4.25399413  | 2.79E-05 | 1.12E-03 |
| MRPL14    | 1.885412583  | 0.30756039  | 10.09021981 | 4.167406249 | 4.01E-05 | 1.43E-03 |
| ZNF414    | 1.68506696   | 0.308496753 | 9.183138636 | 4.114665963 | 4.99E-05 | 1.61E-03 |
| LACTB2    | -1.050892143 | 0.308602273 | 9.23127776  | 3.320534767 | 1.01E-03 | 1.31E-02 |
| UQCR11    | -0.049730894 | 0.308773052 | 10.37725276 | 3.629540151 | 3.32E-04 | 6.17E-03 |
| AIMP2     | 2.49016138   | 0.308965584 | 9.366730195 | 4.323131061 | 2.08E-05 | 9.07E-04 |
| PPIB      | 2.758707184  | 0.309326299 | 13.12800536 | 4.390715306 | 1.56E-05 | 7.46E-04 |
| CMC1      | 0.014757053  | 0.309577273 | 8.105106818 | 3.648617394 | 3.10E-04 | 5.87E-03 |
| NPC2      | -0.92417709  | 0.309831169 | 12.52952532 | 3.361092844 | 8.74E-04 | 1.19E-02 |
| MYCBP     | 0.257996186  | 0.310174026 | 9.787625974 | 3.71976889  | 2.37E-04 | 4.83E-03 |
| C14orf156 | 2.131555846  | 0.310374026 | 9.34252987  | 4.231401293 | 3.07E-05 | 1.18E-03 |

|           |              |             |             |             |          |          |
|-----------|--------------|-------------|-------------|-------------|----------|----------|
| ALG3      | 4.702895327  | 0.310868506 | 11.34731997 | 4.855405143 | 1.92E-06 | 1.81E-04 |
| CTSL1     | 1.104317279  | 0.31096039  | 10.83757565 | 3.958250068 | 9.39E-05 | 2.51E-03 |
| PPAN      | 1.085968377  | 0.311026299 | 9.383038474 | 3.953217723 | 9.58E-05 | 2.54E-03 |
| FADS3     | 2.576051553  | 0.311053896 | 9.630623052 | 4.3448474   | 1.90E-05 | 8.65E-04 |
| DCTPP1    | 0.958343783  | 0.311167532 | 10.67948117 | 3.918054677 | 1.10E-04 | 2.82E-03 |
| NUF2      | -2.135859121 | 0.311443506 | 8.311621104 | 2.95218027  | 3.40E-03 | 3.06E-02 |
| HBXIP     | 3.479080983  | 0.311498377 | 10.85489594 | 4.567669115 | 7.15E-06 | 4.45E-04 |
| ZWINT     | -0.908291827 | 0.311687013 | 9.313172727 | 3.366145318 | 8.59E-04 | 1.18E-02 |
| SHFM1     | 3.537169243  | 0.311928247 | 10.51416737 | 4.581678078 | 6.72E-06 | 4.25E-04 |
| TSEN15    | 4.813351652  | 0.312026299 | 9.835001461 | 4.880657082 | 1.70E-06 | 1.68E-04 |
| HOOK2     | -1.132850102 | 0.312427922 | 10.03217305 | 3.294055568 | 1.10E-03 | 1.39E-02 |
| MGST3     | 0.206736666  | 0.312991234 | 10.69933847 | 3.704878319 | 2.51E-04 | 5.04E-03 |
| JTB       | 6.457030196  | 0.313040909 | 11.89461591 | 5.244212649 | 2.93E-07 | 4.85E-05 |
| PPP4C     | 7.905147382  | 0.3133      | 11.44246169 | 5.547963052 | 6.24E-08 | 1.68E-05 |
| NDUFA9    | 1.984516112  | 0.313634416 | 10.63995097 | 4.193276536 | 3.60E-05 | 1.31E-03 |
| ATP5J     | 1.5637468    | 0.313753247 | 11.44527662 | 4.082433865 | 5.69E-05 | 1.75E-03 |
| P4HB      | 4.151491879  | 0.31385487  | 13.87126055 | 4.727627943 | 3.47E-06 | 2.69E-04 |
| UXT       | 0.070829911  | 0.313945455 | 10.63965519 | 3.665131426 | 2.91E-04 | 5.63E-03 |
| SLC25A33  | 1.053011261  | 0.314634416 | 8.06721526  | 3.944164442 | 9.93E-05 | 2.61E-03 |
| TP53TG1   | -0.403729745 | 0.314811688 | 7.519628571 | 3.523135537 | 4.91E-04 | 8.00E-03 |
| BCL2L12   | 2.24474701   | 0.314837013 | 8.962610065 | 4.260543612 | 2.72E-05 | 1.09E-03 |
| LOC440957 | -2.039108222 | 0.314931818 | 7.354437338 | 2.986755116 | 3.05E-03 | 2.82E-02 |
| FOXMI     | -2.010159769 | 0.315190584 | 11.01405633 | 2.997027067 | 2.95E-03 | 2.75E-02 |
| SCNM1     | 4.485066207  | 0.315259416 | 9.497552435 | 4.80527496  | 2.42E-06 | 2.09E-04 |
| IFI27L1   | -2.072792383 | 0.31545974  | 6.846253896 | 2.974760732 | 3.16E-03 | 2.90E-02 |
| ORC6L     | -0.918531491 | 0.315833117 | 7.807917857 | 3.362889292 | 8.69E-04 | 1.18E-02 |
| APOO      | 1.77448296   | 0.316160065 | 8.189437825 | 4.138278377 | 4.52E-05 | 1.54E-03 |
| ATPIF1    | 1.685691293  | 0.316331169 | 11.20818896 | 4.114831251 | 4.98E-05 | 1.61E-03 |
| MRPL2     | 2.631739932  | 0.316523052 | 9.919939448 | 4.358876647 | 1.79E-05 | 8.31E-04 |
| PSEN2     | 4.759448198  | 0.316587013 | 8.354234416 | 4.868347897 | 1.80E-06 | 1.75E-04 |
| SSBP1     | 4.156795604  | 0.316723701 | 10.38863782 | 4.728871059 | 3.45E-06 | 2.69E-04 |
| NMB       | -2.54929367  | 0.316907143 | 7.492453571 | 2.799906116 | 5.44E-03 | 4.20E-02 |
| C2orf7    | -1.50287627  | 0.317010065 | 8.272886201 | 3.17195116  | 1.67E-03 | 1.85E-02 |
| NUCB2     | 0.426878143  | 0.317390909 | 9.643501299 | 3.768448796 | 1.97E-04 | 4.25E-03 |
| ZNF653    | 2.00537191   | 0.317478247 | 7.707254708 | 4.198702757 | 3.52E-05 | 1.29E-03 |
| POC1A     | 0.337708288  | 0.317532143 | 8.385446591 | 3.742817526 | 2.17E-04 | 4.54E-03 |
| NXT1      | 4.0978626    | 0.317845779 | 9.430977435 | 4.715042198 | 3.67E-06 | 2.79E-04 |
| RAD54L    | -1.930704449 | 0.31866039  | 8.222897078 | 3.025051919 | 2.70E-03 | 2.59E-02 |
| TM7SF2    | -1.98089504  | 0.318730519 | 10.18132175 | 3.00737767  | 2.85E-03 | 2.69E-02 |
| NOP10     | 0.430214977  | 0.319247078 | 10.28074821 | 3.769404871 | 1.96E-04 | 4.24E-03 |
| CDC45     | -2.658600799 | 0.319438961 | 7.659117532 | 2.758318013 | 6.16E-03 | 4.57E-02 |
| C21orf119 | -0.429756649 | 0.32044026  | 7.157313636 | 3.515195795 | 5.06E-04 | 8.17E-03 |
| CETN4P    | -2.732040313 | 0.320850325 | 1.491922565 | 2.730038711 | 6.70E-03 | 4.83E-02 |
| C11orf31  | 3.116971517  | 0.321253247 | 10.28785195 | 4.479482888 | 1.06E-05 | 5.72E-04 |
| TMEM125   | -0.154560785 | 0.321310714 | 9.506726136 | 3.598331303 | 3.73E-04 | 6.66E-03 |

|           |              |             |             |             |          |          |
|-----------|--------------|-------------|-------------|-------------|----------|----------|
| C17orf61  | -2.063051723 | 0.321873701 | 8.776765422 | 2.978233899 | 3.13E-03 | 2.88E-02 |
| GYG1      | 2.389364085  | 0.321971429 | 10.00951039 | 4.297522355 | 2.32E-05 | 9.73E-04 |
| CDK5      | 3.471143451  | 0.321980195 | 8.757353084 | 4.565751947 | 7.21E-06 | 4.47E-04 |
| RAD51     | -0.208074466 | 0.321992532 | 7.776297565 | 3.582303793 | 3.96E-04 | 6.91E-03 |
| IER2      | -2.166960692 | 0.322040584 | 11.68134172 | 2.940984478 | 3.52E-03 | 3.13E-02 |
| SEPHS2    | 6.702785779  | 0.322629545 | 10.53890828 | 5.296768667 | 2.25E-07 | 4.16E-05 |
| ARPM1     | -0.592284128 | 0.322915909 | 6.348807955 | 3.465236809 | 6.05E-04 | 9.27E-03 |
| RNF5      | 3.680069783  | 0.322957143 | 11.21527078 | 4.615983911 | 5.76E-06 | 3.87E-04 |
| NUDT5     | 3.276906577  | 0.323395779 | 9.924062825 | 4.518617405 | 8.89E-06 | 5.14E-04 |
| RPL26L1   | 1.751425357  | 0.323822078 | 7.508716234 | 4.132200978 | 4.64E-05 | 1.56E-03 |
| TXNDC17   | 2.484077781  | 0.323953247 | 9.269378571 | 4.321589248 | 2.09E-05 | 9.07E-04 |
| EIF3G     | 1.159903888  | 0.324087013 | 11.7198026  | 3.97346018  | 8.83E-05 | 2.40E-03 |
| ALKBH7    | -1.084880474 | 0.32431461  | 10.3099664  | 3.309577608 | 1.05E-03 | 1.34E-02 |
| FAHD2B    | -2.209816789 | 0.324368506 | 7.181660227 | 2.925491143 | 3.70E-03 | 3.22E-02 |
| SEPP1     | -2.744183345 | 0.324798377 | 12.55287646 | 2.72533593  | 6.79E-03 | 4.88E-02 |
| C11orf51  | 1.446126622  | 0.324889935 | 9.20842224  | 4.050966188 | 6.47E-05 | 1.92E-03 |
| EPCAM     | -1.649320538 | 0.324900649 | 12.76319448 | 3.122397282 | 1.96E-03 | 2.07E-02 |
| CCDC23    | 1.406760928  | 0.325133766 | 8.595924675 | 4.040385479 | 6.75E-05 | 1.98E-03 |
| CEP55     | -1.913435883 | 0.325551623 | 9.309103734 | 3.031110507 | 2.64E-03 | 2.57E-02 |
| JDP2      | 2.828241509  | 0.32560487  | 9.648101136 | 4.408066304 | 1.44E-05 | 7.11E-04 |
| PPIL5     | 1.44186935   | 0.325653247 | 7.550029221 | 4.049823112 | 6.50E-05 | 1.92E-03 |
| LOC145783 | -0.782303632 | 0.325674351 | 5.770706656 | 3.405971253 | 7.47E-04 | 1.07E-02 |
| FAM125A   | 1.059941427  | 0.326206818 | 10.21802224 | 3.946069702 | 9.85E-05 | 2.59E-03 |
| CHCHD2    | 2.836812182  | 0.327319805 | 12.08335211 | 4.41020081  | 1.43E-05 | 7.08E-04 |
| TBC1D7    | 1.974895091  | 0.327515909 | 8.817326786 | 4.190771255 | 3.64E-05 | 1.32E-03 |
| PDCD10    | 3.673427973  | 0.327748701 | 10.08720812 | 4.614394323 | 5.80E-06 | 3.89E-04 |
| GSTO1     | 2.189552038  | 0.32834026  | 9.834485714 | 4.246355173 | 2.88E-05 | 1.14E-03 |
| BUB1      | -1.308607585 | 0.328677597 | 9.55126737  | 3.236592941 | 1.34E-03 | 1.60E-02 |
| LSM2      | 1.934371514  | 0.328713961 | 10.26517062 | 4.180204419 | 3.80E-05 | 1.37E-03 |
| ZNF799    | -2.762304244 | 0.329662987 | 5.798997078 | 2.718303637 | 6.93E-03 | 4.96E-02 |
| LOC388789 | 1.57966829   | 0.329830844 | 9.372616071 | 4.086676792 | 5.59E-05 | 1.73E-03 |
| OAZ3      | -0.369279632 | 0.329928896 | 3.880104058 | 3.533619621 | 4.73E-04 | 7.83E-03 |
| SYNGR2    | -0.513945819 | 0.330182468 | 12.41008734 | 3.48939931  | 5.55E-04 | 8.74E-03 |
| HIST1H2AL | -2.705585236 | 0.330294481 | 1.936812175 | 2.740257715 | 6.50E-03 | 4.74E-02 |
| ZNF90     | -2.012048747 | 0.330350649 | 9.895627922 | 2.9963578   | 2.95E-03 | 2.76E-02 |
| ATP5G3    | 1.969668334  | 0.330409416 | 12.11518198 | 4.189409668 | 3.66E-05 | 1.33E-03 |
| SLC25A5   | 1.50800362   | 0.330425649 | 12.68146347 | 4.067547676 | 6.04E-05 | 1.83E-03 |
| PRR19     | 0.934859982  | 0.331382792 | 6.504438149 | 3.911553421 | 1.13E-04 | 2.87E-03 |
| FBXO6     | -1.425583649 | 0.331485714 | 8.404441558 | 3.197815889 | 1.53E-03 | 1.75E-02 |
| POLR2J    | 4.052440113  | 0.331618506 | 10.63001769 | 4.704359779 | 3.86E-06 | 2.91E-04 |
| S100A13   | -1.675092926 | 0.331629221 | 11.19409123 | 3.11360007  | 2.02E-03 | 2.11E-02 |
| FBXL12    | 4.102710218  | 0.331762987 | 9.028958117 | 4.716181027 | 3.65E-06 | 2.79E-04 |
| CC2D1A    | 0.370473342  | 0.332283766 | 10.56173604 | 3.752254118 | 2.09E-04 | 4.43E-03 |
| STMN1     | -1.143577257 | 0.332311364 | 12.19509529 | 3.290575161 | 1.12E-03 | 1.40E-02 |
| C3orf21   | 0.40758734   | 0.332472403 | 9.683160877 | 3.762917241 | 2.01E-04 | 4.31E-03 |

|          |              |             |             |             |          |          |
|----------|--------------|-------------|-------------|-------------|----------|----------|
| NENF     | -0.435314348 | 0.332659091 | 10.01355292 | 3.51349823  | 5.09E-04 | 8.22E-03 |
| RPS26    | -2.2291954   | 0.332707792 | 10.59510974 | 2.918459905 | 3.78E-03 | 3.27E-02 |
| SPC25    | -1.972151277 | 0.333175974 | 7.759607468 | 3.010463742 | 2.82E-03 | 2.67E-02 |
| ECT2     | -0.247876667 | 0.33357013  | 10.61398961 | 3.570340142 | 4.14E-04 | 7.11E-03 |
| THOC4    | 1.808708     | 0.33515974  | 10.24411364 | 4.147284601 | 4.36E-05 | 1.50E-03 |
| PSMG3    | 3.264744656  | 0.335421104 | 9.026241721 | 4.515651893 | 9.01E-06 | 5.15E-04 |
| PLSCR1   | -1.831061412 | 0.335525325 | 11.08249123 | 3.059855971 | 2.41E-03 | 2.41E-02 |
| HIGD2A   | 0.385691437  | 0.33572987  | 11.31337338 | 3.756629716 | 2.06E-04 | 4.39E-03 |
| NDUFC1   | 1.088100225  | 0.336043506 | 9.639956169 | 3.953802697 | 9.55E-05 | 2.54E-03 |
| APOA1BP  | 4.226591211  | 0.336056494 | 11.68191721 | 4.745204049 | 3.20E-06 | 2.54E-04 |
| TIMM8B   | -0.034569689 | 0.33634026  | 9.42232013  | 3.634033472 | 3.27E-04 | 6.10E-03 |
| IL20RB   | -2.309507121 | 0.336349351 | 4.400426623 | 2.889147792 | 4.14E-03 | 3.49E-02 |
| NCAPH    | -1.401138204 | 0.336952597 | 8.718189286 | 3.2059556   | 1.49E-03 | 1.73E-02 |
| FAM195A  | 0.305564932  | 0.337093506 | 9.241818182 | 3.733538907 | 2.25E-04 | 4.66E-03 |
| MGST2    | 1.375936333  | 0.337549351 | 9.849223377 | 4.032083093 | 6.98E-05 | 2.04E-03 |
| MRPL52   | 1.278309983  | 0.337670779 | 9.395287987 | 4.005686402 | 7.76E-05 | 2.19E-03 |
| RABAC1   | 0.571021325  | 0.338047727 | 10.81060763 | 3.809550229 | 1.68E-04 | 3.80E-03 |
| BOLA3    | 2.516128065  | 0.338646429 | 8.378736851 | 4.329706555 | 2.02E-05 | 8.91E-04 |
| TIMM10   | 3.239838945  | 0.338674026 | 8.743332468 | 4.509573689 | 9.25E-06 | 5.26E-04 |
| FAM162A  | 2.674667049  | 0.338734416 | 10.55916916 | 4.369663976 | 1.70E-05 | 8.03E-04 |
| PGLS     | 1.592824916  | 0.339831818 | 11.32021266 | 4.090179942 | 5.51E-05 | 1.71E-03 |
| PLP2     | -2.156514174 | 0.340075325 | 11.50616948 | 2.944749443 | 3.48E-03 | 3.10E-02 |
| MRPL15   | 4.991958846  | 0.340362013 | 10.59330828 | 4.921255842 | 1.41E-06 | 1.44E-04 |
| SILV     | -1.535193303 | 0.340423052 | 5.694379058 | 3.161078192 | 1.73E-03 | 1.89E-02 |
| CENPK    | -1.220776502 | 0.340555844 | 7.153396753 | 3.265426305 | 1.22E-03 | 1.49E-02 |
| UBE2L6   | -1.620043348 | 0.340829221 | 11.54394318 | 3.132362759 | 1.90E-03 | 2.02E-02 |
| TRMT1    | 0.311918405  | 0.341878571 | 9.870889935 | 3.735374587 | 2.23E-04 | 4.64E-03 |
| YIF1A    | 4.431345181  | 0.342347403 | 10.80834318 | 4.792843029 | 2.57E-06 | 2.17E-04 |
| HSPE1    | 3.500429829  | 0.342378247 | 11.09908653 | 4.572822078 | 6.99E-06 | 4.37E-04 |
| TPX2     | -1.343035418 | 0.342600649 | 11.17040747 | 3.225225417 | 1.39E-03 | 1.64E-02 |
| CDK1     | 0.090088147  | 0.342787987 | 10.08152386 | 3.670787513 | 2.85E-04 | 5.56E-03 |
| FAM176B  | -1.123253759 | 0.342797727 | 9.073945617 | 3.297166191 | 1.09E-03 | 1.38E-02 |
| SLC25A39 | 7.048832089  | 0.34311461  | 11.99271964 | 5.370050322 | 1.56E-07 | 3.33E-05 |
| BOLA2    | 3.994670687  | 0.343294481 | 10.5555888  | 4.690743372 | 4.10E-06 | 3.04E-04 |
| FKBPL    | 5.51958304   | 0.343707468 | 7.561226461 | 5.039566163 | 7.98E-07 | 9.53E-05 |
| PPIL1    | 4.244839879  | 0.343724675 | 9.918821429 | 4.749466494 | 3.13E-06 | 2.52E-04 |
| MAP4K2   | 3.211387425  | 0.343778896 | 8.649806981 | 4.502621387 | 9.54E-06 | 5.37E-04 |
| RPP21    | 3.908578271  | 0.343949026 | 9.251862825 | 4.670387715 | 4.50E-06 | 3.24E-04 |
| DGAT2    | -2.58071138  | 0.344201623 | 7.968204708 | 2.788012922 | 5.63E-03 | 4.30E-02 |
| TMEM161A | 3.900138476  | 0.344646429 | 9.79622711  | 4.668388095 | 4.54E-06 | 3.25E-04 |
| MRPL12   | 1.127156754  | 0.344923701 | 10.66633458 | 3.964505964 | 9.15E-05 | 2.45E-03 |
| LPAR2    | 3.007720928  | 0.345018506 | 9.324501461 | 4.452577923 | 1.19E-05 | 6.23E-04 |
| MLF1IP   | -1.089436672 | 0.345129545 | 8.325906331 | 3.308106219 | 1.05E-03 | 1.34E-02 |
| C2orf79  | 0.617157945  | 0.345251623 | 9.631669318 | 3.822621032 | 1.60E-04 | 3.68E-03 |
| CKS1B    | 1.271094947  | 0.345537987 | 10.29399172 | 4.003729373 | 7.82E-05 | 2.20E-03 |

|           |              |             |             |             |          |          |
|-----------|--------------|-------------|-------------|-------------|----------|----------|
| RAG1A1    | 2.798101793  | 0.345540909 | 10.45098539 | 4.400552868 | 1.49E-05 | 7.23E-04 |
| GNG5      | 6.834282679  | 0.345916883 | 11.32747922 | 5.324713498 | 1.96E-07 | 3.83E-05 |
| NDUFS3    | 7.810073452  | 0.346131169 | 10.77963766 | 5.528440719 | 6.91E-08 | 1.70E-05 |
| OCEL1     | 1.269361609  | 0.346325974 | 8.561058442 | 4.003259089 | 7.84E-05 | 2.20E-03 |
| NDUFB2    | 2.24891193   | 0.346328571 | 10.27314286 | 4.261612551 | 2.70E-05 | 1.09E-03 |
| BAK1      | 3.322405495  | 0.346519156 | 9.770494643 | 4.52969667  | 8.47E-06 | 4.99E-04 |
| CSTB      | 1.853509531  | 0.346577922 | 11.70488442 | 4.159047753 | 4.15E-05 | 1.46E-03 |
| EXO1      | -0.797155795 | 0.347622727 | 7.787088636 | 3.4012988   | 7.59E-04 | 1.08E-02 |
| ISOC2     | 1.20795994   | 0.347673052 | 10.12978328 | 3.986567656 | 8.38E-05 | 2.31E-03 |
| NPM3      | 0.278827864  | 0.347687662 | 8.468029545 | 3.725804867 | 2.32E-04 | 4.76E-03 |
| SEC11C    | 0.916791816  | 0.347963961 | 8.824926786 | 3.906544789 | 1.15E-04 | 2.91E-03 |
| PEPD      | 2.623863837  | 0.34801526  | 10.58409984 | 4.356894881 | 1.80E-05 | 8.35E-04 |
| PRDX5     | 6.198524122  | 0.348052922 | 11.94330179 | 5.188453989 | 3.86E-07 | 5.91E-05 |
| PDCD2L    | 3.574052416  | 0.348176623 | 8.223903896 | 4.590553817 | 6.45E-06 | 4.13E-04 |
| DBI       | 1.452009329  | 0.348275649 | 10.25986445 | 4.052545217 | 6.42E-05 | 1.91E-03 |
| LOC728554 | -1.544936353 | 0.348426948 | 9.129025162 | 3.157793307 | 1.75E-03 | 1.91E-02 |
| ANAPC11   | 1.804963198  | 0.348480519 | 10.44337987 | 4.146300016 | 4.38E-05 | 1.50E-03 |
| SLC2A1    | -0.869935498 | 0.348543831 | 12.86048231 | 3.37831609  | 8.23E-04 | 1.14E-02 |
| RPS10     | 0.62009223   | 0.348994156 | 12.80579513 | 3.823450964 | 1.59E-04 | 3.68E-03 |
| ZNF433    | -0.077781287 | 0.349667208 | 6.702962175 | 3.621213417 | 3.43E-04 | 6.28E-03 |
| NDUFB4    | 4.65813724   | 0.349706494 | 11.43977597 | 4.845140873 | 2.01E-06 | 1.87E-04 |
| PSMD8     | 3.142523388  | 0.35027987  | 12.12132175 | 4.48575516  | 1.03E-05 | 5.64E-04 |
| RAD51A1   | -0.148421006 | 0.350654545 | 8.556161688 | 3.600166003 | 3.71E-04 | 6.63E-03 |
| NDUFS6    | 1.612713772  | 0.351313636 | 10.28831136 | 4.095470568 | 5.39E-05 | 1.69E-03 |
| ZNF627    | 3.612035201  | 0.352521429 | 9.411694481 | 4.599678646 | 6.19E-06 | 4.02E-04 |
| BRP44     | 5.815671914  | 0.35295     | 9.681961364 | 5.104943928 | 5.81E-07 | 7.80E-05 |
| ADA       | 1.728230876  | 0.353749675 | 7.7040625   | 4.126079455 | 4.76E-05 | 1.58E-03 |
| TEKT5     | -2.549346902 | 0.353982792 | 1.477923864 | 2.799886006 | 5.44E-03 | 4.20E-02 |
| CYBA      | -0.601427114 | 0.354711688 | 12.2042487  | 3.462406638 | 6.11E-04 | 9.31E-03 |
| EDEM2     | 8.620249725  | 0.354996429 | 10.10739692 | 5.693060247 | 2.92E-08 | 9.35E-06 |
| PLK1      | -0.0399887   | 0.355109416 | 10.25198977 | 3.632428025 | 3.29E-04 | 6.11E-03 |
| SNRPG     | 3.792676894  | 0.355729545 | 9.137292045 | 4.642862514 | 5.10E-06 | 3.53E-04 |
| CCDC130   | 2.35700791   | 0.355994805 | 9.438005844 | 4.289273307 | 2.40E-05 | 9.95E-04 |
| TMEM147   | 5.202090384  | 0.356002273 | 10.94923685 | 4.968659441 | 1.12E-06 | 1.25E-04 |
| GMNN      | 0.207017944  | 0.356239935 | 8.689616721 | 3.704960177 | 2.51E-04 | 5.04E-03 |
| C17orf37  | -0.020416354 | 0.356648052 | 10.09784221 | 3.638223509 | 3.22E-04 | 6.04E-03 |
| RPL18A    | -2.159203026 | 0.356880195 | 10.03668555 | 2.943780805 | 3.49E-03 | 3.10E-02 |
| CCDC58    | 5.62048154   | 0.356880195 | 8.553442695 | 5.061924676 | 7.16E-07 | 8.75E-05 |
| MRPL22    | 4.596508525  | 0.357043182 | 9.207616396 | 4.830977268 | 2.15E-06 | 1.90E-04 |
| HINT1     | 2.126564145  | 0.357051948 | 11.77079221 | 4.230112032 | 3.09E-05 | 1.19E-03 |
| KIF18A    | 0.183192754  | 0.357705844 | 7.909469805 | 3.698020649 | 2.57E-04 | 5.15E-03 |
| RPA3      | 2.282600836  | 0.358706169 | 8.434945942 | 4.270250214 | 2.61E-05 | 1.07E-03 |
| GLRX3     | 6.540544183  | 0.358750974 | 9.956837175 | 5.262121285 | 2.68E-07 | 4.69E-05 |
| C1orf31   | 3.654533982  | 0.358809091 | 8.73932013  | 4.60986982  | 5.92E-06 | 3.89E-04 |
| TIMM44    | 5.410277092  | 0.359495779 | 9.413761526 | 5.015249984 | 8.97E-07 | 1.05E-04 |

|           |              |             |             |             |          |          |
|-----------|--------------|-------------|-------------|-------------|----------|----------|
| C11orf83  | 3.611187916  | 0.359580844 | 9.049244968 | 4.599475269 | 6.20E-06 | 4.02E-04 |
| CDK2AP2   | 2.94616076   | 0.360496753 | 11.36116916 | 4.437354808 | 1.27E-05 | 6.47E-04 |
| GINS2     | -0.609615984 | 0.360635065 | 7.932759091 | 3.459869997 | 6.17E-04 | 9.34E-03 |
| MYEOV2    | 1.743805982  | 0.36082987  | 9.463666234 | 4.130190953 | 4.68E-05 | 1.56E-03 |
| NDUFA1    | 0.688802948  | 0.361551299 | 10.97039058 | 3.842838655 | 1.48E-04 | 3.48E-03 |
| COX6A1    | 3.001264277  | 0.361904221 | 11.50598847 | 4.450983406 | 1.20E-05 | 6.24E-04 |
| COX8A     | 3.133608579  | 0.362062662 | 12.10755081 | 4.483567693 | 1.04E-05 | 5.68E-04 |
| PSMB8     | -1.954463414 | 0.362506818 | 10.86942808 | 3.016697513 | 2.77E-03 | 2.64E-02 |
| PSMB3     | 4.724969819  | 0.362822727 | 11.24474383 | 4.86046063  | 1.87E-06 | 1.78E-04 |
| ATP6V1F   | 8.57019499   | 0.363002273 | 11.20890244 | 5.683001199 | 3.08E-08 | 9.57E-06 |
| UCP1      | -2.681549201 | 0.363031818 | 1.013184091 | 2.749510986 | 6.32E-03 | 4.65E-02 |
| CENPL     | 5.791977908  | 0.363860714 | 8.160668019 | 5.099738097 | 5.96E-07 | 7.85E-05 |
| PODXL2    | -2.539978573 | 0.363977597 | 9.67059789  | 2.803423151 | 5.38E-03 | 4.17E-02 |
| ATP5O     | 4.745171239  | 0.364009416 | 11.57614886 | 4.865083224 | 1.83E-06 | 1.76E-04 |
| NUDT1     | 2.342309506  | 0.364809416 | 7.734157305 | 4.285521391 | 2.44E-05 | 1.01E-03 |
| KIF20A    | -1.130111053 | 0.364819481 | 9.668495455 | 3.2949437   | 1.10E-03 | 1.38E-02 |
| KCNK17    | -2.404383796 | 0.365639935 | 3.105163474 | 2.854153338 | 4.61E-03 | 3.74E-02 |
| MSX2P1    | -1.972135082 | 0.36577987  | 0.966096429 | 3.010469456 | 2.82E-03 | 2.67E-02 |
| RFC4      | 3.597462191  | 0.366462338 | 9.446901299 | 4.596179542 | 6.29E-06 | 4.05E-04 |
| C1orf122  | 2.140919081  | 0.366510714 | 10.24575925 | 4.233818699 | 3.04E-05 | 1.17E-03 |
| ZNF626    | -2.45026048  | 0.366641558 | 8.326861688 | 2.837085663 | 4.86E-03 | 3.87E-02 |
| SNRPB     | 4.674904477  | 0.366778247 | 12.40602744 | 4.848988235 | 1.97E-06 | 1.86E-04 |
| PRDX4     | 3.090047291  | 0.366918182 | 11.01419286 | 4.472865433 | 1.09E-05 | 5.87E-04 |
| NEIL3     | -1.701012892 | 0.366966558 | 6.442709903 | 3.104728937 | 2.08E-03 | 2.15E-02 |
| CDCA3     | 0.280953557  | 0.367347403 | 8.85176461  | 3.726420286 | 2.31E-04 | 4.75E-03 |
| UBTD1     | 3.12208991   | 0.367904545 | 9.557891234 | 4.480739925 | 1.05E-05 | 5.72E-04 |
| DEPDC1    | -1.692875328 | 0.367910065 | 8.678339448 | 3.107516581 | 2.06E-03 | 2.14E-02 |
| ROPN1     | -0.706491085 | 0.368117208 | 0.964721591 | 3.429729969 | 6.87E-04 | 1.01E-02 |
| LOC730101 | -2.653363909 | 0.368272727 | 6.913938961 | 2.76032406  | 6.12E-03 | 4.55E-02 |
| AURKA     | 0.855198182  | 0.368518506 | 9.387391071 | 3.88942685  | 1.23E-04 | 3.06E-03 |
| TIGD3     | -2.700066204 | 0.368671104 | 3.324449188 | 2.742385029 | 6.46E-03 | 4.72E-02 |
| CUTA      | 6.966299039  | 0.368907468 | 11.95569529 | 5.352647543 | 1.70E-07 | 3.45E-05 |
| C19orf42  | 6.178010309  | 0.369095455 | 10.44454448 | 5.18400789  | 3.94E-07 | 6.00E-05 |
| TROAP     | -1.21649814  | 0.369627597 | 9.343898214 | 3.266824761 | 1.21E-03 | 1.48E-02 |
| ZNF709    | -0.967232005 | 0.369932792 | 7.744938474 | 3.347363248 | 9.17E-04 | 1.23E-02 |
| ICAM3     | 2.211803837  | 0.370177922 | 8.475348052 | 4.252080269 | 2.81E-05 | 1.12E-03 |
| LOC729991 | 3.910611278  | 0.370270779 | 8.69443539  | 4.67086928  | 4.49E-06 | 3.24E-04 |
| NDUFB3    | 6.354985315  | 0.370874351 | 9.736337825 | 5.222261135 | 3.26E-07 | 5.28E-05 |
| SEC61G    | 5.632130819  | 0.372085714 | 9.673903896 | 5.064500741 | 7.07E-07 | 8.70E-05 |
| NDUFC2    | -0.077533813 | 0.372217857 | 12.22070698 | 3.621286956 | 3.43E-04 | 6.28E-03 |
| PNP       | -0.573162063 | 0.372362662 | 9.71428263  | 3.47114908  | 5.92E-04 | 9.13E-03 |
| ACBD7     | -2.266754304 | 0.372652273 | 8.006743019 | 2.904786469 | 3.94E-03 | 3.37E-02 |
| SAR1B     | 4.624710861  | 0.372751299 | 8.725522403 | 4.837463163 | 2.08E-06 | 1.88E-04 |
| COX5A     | 1.505985613  | 0.372827922 | 11.28470682 | 4.067007855 | 6.06E-05 | 1.83E-03 |
| E2F1      | 0.494768834  | 0.37287987  | 9.652151623 | 3.787857787 | 1.83E-04 | 4.02E-03 |

|           |              |             |             |             |          |          |
|-----------|--------------|-------------|-------------|-------------|----------|----------|
| COX7A2    | 1.697288593  | 0.373649026 | 11.1779901  | 4.117900495 | 4.92E-05 | 1.61E-03 |
| GSTP1     | 6.305466125  | 0.373834091 | 13.48731769 | 5.211581079 | 3.44E-07 | 5.46E-05 |
| C1orf210  | -1.422657043 | 0.374718831 | 9.003420455 | 3.198791393 | 1.52E-03 | 1.75E-02 |
| MAD2L1    | 0.657264505  | 0.374804221 | 8.816570942 | 3.833950665 | 1.53E-04 | 3.57E-03 |
| GPX7      | 0.27010312   | 0.374967857 | 9.182550812 | 3.723277958 | 2.34E-04 | 4.79E-03 |
| MRPS6     | 3.168218895  | 0.375050974 | 10.19888068 | 4.492054982 | 1.00E-05 | 5.53E-04 |
| DNAJB1    | 5.636872753  | 0.376471104 | 12.13412192 | 5.065549034 | 7.04E-07 | 8.70E-05 |
| NDUFB1    | 2.95690627   | 0.377354221 | 9.047102435 | 4.440015338 | 1.26E-05 | 6.43E-04 |
| NDUFS8    | 5.954544918  | 0.377371104 | 11.85100698 | 5.135366912 | 5.01E-07 | 7.00E-05 |
| NDUFB5    | 5.010242144  | 0.377669805 | 11.10577841 | 4.925395728 | 1.38E-06 | 1.42E-04 |
| NME1      | 2.835785207  | 0.378576623 | 11.00949416 | 4.409945092 | 1.43E-05 | 7.08E-04 |
| C19orf12  | 0.7222422    | 0.378709091 | 9.676087662 | 3.852242044 | 1.42E-04 | 3.36E-03 |
| TIMP1     | -0.654913625 | 0.379812013 | 13.14893588 | 3.445807171 | 6.49E-04 | 9.66E-03 |
| C10orf125 | -0.577239049 | 0.380020455 | 7.322546591 | 3.469889313 | 5.95E-04 | 9.17E-03 |
| SNRPF     | 5.248998476  | 0.380466234 | 9.662142857 | 4.979189238 | 1.07E-06 | 1.20E-04 |
| C6orf115  | 1.874847493  | 0.381061039 | 9.047503247 | 4.164639882 | 4.06E-05 | 1.44E-03 |
| CDCA5     | 1.807900118  | 0.381093506 | 9.467813636 | 4.14707221  | 4.36E-05 | 1.50E-03 |
| DIAPH3    | -1.444721731 | 0.381129221 | 7.559493831 | 3.191429874 | 1.56E-03 | 1.78E-02 |
| SNRPC     | 7.594288821  | 0.381547727 | 10.62253295 | 5.483922446 | 8.70E-08 | 2.05E-05 |
| AP1M2     | -0.920822316 | 0.381975    | 11.1287849  | 3.362160451 | 8.71E-04 | 1.19E-02 |
| CHAC2     | 1.506432576  | 0.382769481 | 6.234779545 | 4.067127424 | 6.05E-05 | 1.83E-03 |
| RPL22L1   | -0.031333376 | 0.383411364 | 9.206280357 | 3.634991959 | 3.26E-04 | 6.10E-03 |
| LMAN2     | 8.653044706  | 0.383628247 | 11.61797906 | 5.699643034 | 2.82E-08 | 9.18E-06 |
| KPNA2     | 1.750452174  | 0.383784416 | 11.62373961 | 4.131944297 | 4.64E-05 | 1.56E-03 |
| COX5B     | 5.049971305  | 0.383904221 | 12.37208133 | 4.93438144  | 1.32E-06 | 1.39E-04 |
| C11orf10  | 6.754486637  | 0.384219481 | 10.74736429 | 5.307770277 | 2.13E-07 | 4.01E-05 |
| HHIPL1    | -2.600846444 | 0.384278571 | 6.138921753 | 2.780365402 | 5.76E-03 | 4.35E-02 |
| A1BG      | -2.555124049 | 0.385794156 | 6.396466558 | 2.797702648 | 5.47E-03 | 4.22E-02 |
| CCDC124   | 8.58700221   | 0.385863312 | 10.7352914  | 5.686380387 | 3.02E-08 | 9.54E-06 |
| C14orf2   | 3.590096844  | 0.386224026 | 10.62774253 | 4.594410181 | 6.34E-06 | 4.07E-04 |
| DLEU2     | 0.509774921  | 0.386575    | 6.061168669 | 3.792135642 | 1.80E-04 | 3.97E-03 |
| C19orf40  | 2.998642478  | 0.387101623 | 6.571409253 | 4.450335791 | 1.20E-05 | 6.24E-04 |
| NDUFA2    | 3.730761103  | 0.387335714 | 10.21201721 | 4.628100318 | 5.45E-06 | 3.72E-04 |
| ATP5L     | 3.651119877  | 0.38837013  | 11.66045    | 4.609051842 | 5.94E-06 | 3.90E-04 |
| NEU1      | 4.426146982  | 0.388837662 | 10.80704026 | 4.791638615 | 2.58E-06 | 2.17E-04 |
| MRPL47    | 10.12944256  | 0.389283117 | 9.780341558 | 5.989992211 | 5.86E-09 | 2.46E-06 |
| MRPS12    | 1.235680784  | 0.389554545 | 10.18014351 | 3.994111046 | 8.13E-05 | 2.26E-03 |
| PDE6D     | 10.86362304  | 0.390421104 | 8.893104708 | 6.130324204 | 2.69E-09 | 1.25E-06 |
| RDM1      | -2.086295558 | 0.390607143 | 4.395613961 | 2.969939659 | 3.21E-03 | 2.93E-02 |
| DLGAP5    | -0.196560518 | 0.390673052 | 8.692190422 | 3.5857578   | 3.91E-04 | 6.85E-03 |
| TIMM17B   | 2.181318416  | 0.391083117 | 10.43575    | 4.244235038 | 2.91E-05 | 1.14E-03 |
| HIST1H1A  | -1.757159638 | 0.391139935 | 1.463210227 | 3.085430712 | 2.22E-03 | 2.25E-02 |
| MARCH2    | 6.495422126  | 0.391208117 | 9.251684578 | 5.252451655 | 2.81E-07 | 4.69E-05 |
| TTK       | 0.422653501  | 0.391292208 | 8.929812987 | 3.767238029 | 1.98E-04 | 4.27E-03 |
| TK1       | -0.812635202 | 0.391581494 | 10.41727711 | 3.396422692 | 7.73E-04 | 1.09E-02 |



|          |              |             |             |             |          |          |
|----------|--------------|-------------|-------------|-------------|----------|----------|
| TLCD1    | 0.983205602  | 0.391588312 | 7.806128571 | 3.924926843 | 1.07E-04 | 2.76E-03 |
| AURKB    | -0.915751767 | 0.391630844 | 8.604854383 | 3.363773482 | 8.66E-04 | 1.18E-02 |
| MND1     | -0.645891561 | 0.391996104 | 6.426062987 | 3.448612325 | 6.42E-04 | 9.60E-03 |
| C6orf125 | 6.894201864  | 0.39206039  | 9.966308117 | 5.33740705  | 1.84E-07 | 3.65E-05 |
| POLR2L   | 4.376542457  | 0.392287338 | 11.11830666 | 4.78013227  | 2.72E-06 | 2.26E-04 |
| C6orf150 | -1.918998886 | 0.392512013 | 6.673721591 | 3.02916     | 2.66E-03 | 2.57E-02 |
| TMSL3    | 1.133060541  | 0.392713312 | 14.6508625  | 3.966121609 | 9.10E-05 | 2.44E-03 |
| GPR19    | -2.284824625 | 0.392755195 | 5.633587987 | 2.898186204 | 4.02E-03 | 3.42E-02 |
| CDKN2D   | -0.596063759 | 0.392958117 | 7.851839448 | 3.464067099 | 6.08E-04 | 9.30E-03 |
| HSD17B10 | 7.808019213  | 0.393550325 | 10.42979789 | 5.528018287 | 6.92E-08 | 1.70E-05 |
| BFSP1    | -2.664899285 | 0.393564935 | 4.41067013  | 2.755903473 | 6.20E-03 | 4.59E-02 |
| C19orf10 | 5.572732612  | 0.393809091 | 10.56453961 | 5.051354171 | 7.54E-07 | 9.16E-05 |
| KIFC1    | 1.143911703  | 0.394403247 | 9.555820455 | 3.969089624 | 8.99E-05 | 2.43E-03 |
| HMGA1    | 2.193608173  | 0.394762987 | 13.36649773 | 4.247399273 | 2.87E-05 | 1.14E-03 |
| HLA-H    | -0.582777927 | 0.395001623 | 9.620254708 | 3.468177152 | 5.99E-04 | 9.20E-03 |
| REEP2    | -2.196110155 | 0.39538961  | 7.493095455 | 2.930454773 | 3.64E-03 | 3.19E-02 |
| PPIH     | 6.816364874  | 0.39608961  | 9.396824675 | 5.320912859 | 1.99E-07 | 3.86E-05 |
| C1orf59  | -1.166208338 | 0.396208117 | 7.927824838 | 3.283221297 | 1.14E-03 | 1.42E-02 |
| C12orf75 | -0.685682595 | 0.396386039 | 8.997337825 | 3.436224539 | 6.71E-04 | 9.89E-03 |
| DDA1     | 9.951249884  | 0.396794156 | 10.59159448 | 5.955543879 | 7.08E-09 | 2.91E-06 |
| GEMIN8P4 | 1.605140363  | 0.396894481 | 5.198643994 | 4.093456688 | 5.44E-05 | 1.70E-03 |
| BCAS4    | 1.471499173  | 0.397143182 | 8.603845617 | 4.057772729 | 6.29E-05 | 1.87E-03 |
| HSH2D    | -2.598863088 | 0.39715974  | 8.227768182 | 2.781119589 | 5.75E-03 | 4.35E-02 |
| NDUFB11  | 4.606575062  | 0.397191558 | 11.38384123 | 4.833293195 | 2.12E-06 | 1.89E-04 |
| CCDC109B | -1.629392934 | 0.397236688 | 8.386817695 | 3.129183542 | 1.92E-03 | 2.04E-02 |
| ZNF563   | 2.530748498  | 0.398253247 | 5.903964286 | 4.33340499  | 1.99E-05 | 8.87E-04 |
| ECHDC3   | -0.51637794  | 0.398282792 | 8.666263474 | 3.488651472 | 5.56E-04 | 8.75E-03 |
| MRPL11   | 7.035042132  | 0.398593831 | 10.33965406 | 5.367145826 | 1.58E-07 | 3.34E-05 |
| C20orf24 | 9.235695677  | 0.398655844 | 11.17768117 | 5.81560014  | 1.52E-08 | 5.29E-06 |
| HTATIP2  | -0.29698597  | 0.399605844 | 8.864554221 | 3.555528095 | 4.37E-04 | 7.42E-03 |
| MELK     | -0.802553941 | 0.399807792 | 8.799983117 | 3.399599085 | 7.64E-04 | 1.08E-02 |
| C1orf135 | 1.236035866  | 0.399840584 | 6.953496266 | 3.994207588 | 8.13E-05 | 2.26E-03 |
| MAGIX    | -0.941934134 | 0.400357468 | 7.366543669 | 3.355436686 | 8.92E-04 | 1.20E-02 |
| ILVBL    | 5.130243902  | 0.401705195 | 10.51875519 | 4.952494837 | 1.21E-06 | 1.30E-04 |
| NDUFA4   | 3.698981727  | 0.402448052 | 11.78161039 | 4.620507522 | 5.64E-06 | 3.82E-04 |
| PFDN6    | 6.448382885  | 0.404047727 | 9.077198539 | 5.242355432 | 2.95E-07 | 4.85E-05 |
| NDC80    | 0.117674351  | 0.404316883 | 8.134938961 | 3.678875666 | 2.77E-04 | 5.44E-03 |
| KHDC1    | -2.026231585 | 0.404533766 | 5.330191558 | 2.99132831  | 3.00E-03 | 2.79E-02 |
| ISG20    | -1.787948194 | 0.405232792 | 7.836225487 | 3.074800158 | 2.30E-03 | 2.32E-02 |
| MAPK8IP1 | -1.496754811 | 0.40564513  | 10.24547192 | 3.174006785 | 1.66E-03 | 1.85E-02 |
| PLBD1    | -1.674493997 | 0.406813961 | 8.800889448 | 3.113804774 | 2.02E-03 | 2.11E-02 |
| FAM46D   | -2.529063267 | 0.406909091 | 1.226986364 | 2.807539049 | 5.31E-03 | 4.14E-02 |
| SPINT2   | 0.361544517  | 0.407531494 | 13.73977484 | 3.749684688 | 2.12E-04 | 4.45E-03 |
| ATP6V0B  | 6.004810812  | 0.407731169 | 11.66894026 | 5.14634158  | 4.75E-07 | 6.72E-05 |
| ADAM21P1 | -1.03950154  | 0.408412338 | 1.42446461  | 3.324199366 | 9.94E-04 | 1.29E-02 |

|           |              |             |             |             |          |          |
|-----------|--------------|-------------|-------------|-------------|----------|----------|
| C2orf7    | 8.483883239  | 0.40844513  | 7.435625812 | 5.665622237 | 3.37E-08 | 1.03E-05 |
| LSM10     | 5.499056007  | 0.408922403 | 9.17753263  | 5.03500727  | 8.16E-07 | 9.68E-05 |
| LOC647121 | -1.319524976 | 0.408958442 | 5.37721039  | 3.232992226 | 1.36E-03 | 1.61E-02 |
| DDX49     | 13.36823005  | 0.409119805 | 10.23684562 | 6.591612825 | 1.89E-10 | 1.34E-07 |
| HLA-B     | -2.620500331 | 0.409568831 | 14.08217597 | 2.772881331 | 5.90E-03 | 4.43E-02 |
| C19orf52  | 11.15491794  | 0.410127597 | 8.235607305 | 6.185316073 | 1.97E-09 | 9.65E-07 |
| ZNF99     | -2.07936508  | 0.410233117 | 1.649789935 | 2.972414986 | 3.19E-03 | 2.92E-02 |
| TMED9     | 13.537355    | 0.410627922 | 11.4286789  | 6.621883998 | 1.58E-10 | 1.16E-07 |
| GYLTL1B   | -1.174978758 | 0.411579545 | 10.06147289 | 3.28036727  | 1.16E-03 | 1.43E-02 |
| GSTM3     | -2.706106598 | 0.41165487  | 8.223618344 | 2.740056675 | 6.50E-03 | 4.74E-02 |
| UBA52     | 5.931252585  | 0.411890909 | 13.86156169 | 5.130274789 | 5.14E-07 | 7.13E-05 |
| DCAF15    | 4.743089322  | 0.413055844 | 10.32713247 | 4.864607002 | 1.84E-06 | 1.76E-04 |
| PRKCSH    | 9.338523521  | 0.413062338 | 13.26557987 | 5.835873715 | 1.36E-08 | 5.13E-06 |
| GIPC1     | 7.160400775  | 0.413940909 | 12.03988344 | 5.393502077 | 1.38E-07 | 3.02E-05 |
| NDUFA11   | 3.191179205  | 0.414051623 | 10.91482516 | 4.497677695 | 9.75E-06 | 5.44E-04 |
| DNAJB11   | 14.06343988  | 0.414225974 | 10.64447922 | 6.715399545 | 9.08E-11 | 7.45E-08 |
| LAGE3     | 2.990080866  | 0.414366558 | 9.460835227 | 4.4482204   | 1.21E-05 | 6.28E-04 |
| TAP1      | -1.951515319 | 0.414581494 | 11.18432516 | 3.017735339 | 2.76E-03 | 2.63E-02 |
| FAM64A    | 0.119588956  | 0.414842208 | 7.767743182 | 3.679436418 | 2.76E-04 | 5.43E-03 |
| C6orf126  | -1.654834403 | 0.415347727 | 1.031532305 | 3.120517119 | 1.98E-03 | 2.07E-02 |
| IMMP1L    | 6.513314933  | 0.41554513  | 6.430032305 | 5.256287837 | 2.76E-07 | 4.69E-05 |
| NR2F6     | 3.736416122  | 0.416477922 | 12.09591429 | 4.629450298 | 5.42E-06 | 3.71E-04 |
| PGLYRP2   | -0.819761171 | 0.418146104 | 1.101267208 | 3.394175789 | 7.79E-04 | 1.10E-02 |
| SH2D2A    | -0.266063469 | 0.418713636 | 6.695822403 | 3.564861337 | 4.22E-04 | 7.22E-03 |
| CCNA2     | 1.413195576  | 0.418755844 | 9.612487662 | 4.042116679 | 6.70E-05 | 1.97E-03 |
| FAM46B    | -2.573110415 | 0.419133442 | 6.717594643 | 2.790894682 | 5.59E-03 | 4.28E-02 |
| MCM10     | -0.401898891 | 0.419420455 | 7.807065422 | 3.523693436 | 4.90E-04 | 7.99E-03 |
| CLCN4     | -2.117924395 | 0.419481169 | 7.454854221 | 2.958618161 | 3.33E-03 | 3.01E-02 |
| COX6B1    | 4.641521223  | 0.41991039  | 12.37099481 | 4.841325636 | 2.05E-06 | 1.87E-04 |
| PDIA6     | 15.74409574  | 0.420097727 | 13.02317289 | 7.007994974 | 1.54E-11 | 1.66E-08 |
| USE1      | 5.991582185  | 0.420686039 | 9.192620292 | 5.143455241 | 4.82E-07 | 6.77E-05 |
| ASB2      | -1.126157952 | 0.420718182 | 5.199926623 | 3.296225094 | 1.09E-03 | 1.38E-02 |
| USMG5     | 3.446200438  | 0.420862662 | 9.947247565 | 4.559722859 | 7.41E-06 | 4.58E-04 |
| CCNB2     | 2.288731246  | 0.422543831 | 9.739084253 | 4.271820359 | 2.59E-05 | 1.06E-03 |
| CKS2      | 1.20041461   | 0.422769805 | 9.906041396 | 3.984512201 | 8.45E-05 | 2.32E-03 |
| TUBA1C    | 12.41555603  | 0.42327987  | 12.89621396 | 6.419116601 | 5.19E-10 | 3.13E-07 |
| C1orf51   | 1.096713751  | 0.423472078 | 7.698045779 | 3.956165434 | 9.46E-05 | 2.52E-03 |
| MAN2B1    | 7.492445511  | 0.423658442 | 11.35763442 | 5.462808698 | 9.69E-08 | 2.24E-05 |
| ATP5G1    | 2.787808224  | 0.424538636 | 10.31665308 | 4.397984237 | 1.51E-05 | 7.28E-04 |
| SDF2L1    | 2.797351801  | 0.426297078 | 8.677722565 | 4.400365761 | 1.49E-05 | 7.23E-04 |
| C1orf14   | -0.545549617 | 0.42738474  | 0.710437175 | 3.479670111 | 5.75E-04 | 8.94E-03 |
| ZNF878    | -1.409356735 | 0.428061039 | 2.724783766 | 3.203221192 | 1.50E-03 | 1.74E-02 |
| CCNI2     | -2.546428165 | 0.42820487  | 3.958425812 | 2.800988471 | 5.42E-03 | 4.19E-02 |
| ZNF695    | -0.405797606 | 0.428360065 | 6.283515097 | 3.52250532  | 4.92E-04 | 8.02E-03 |
| NACC1     | 5.040381027  | 0.429055519 | 12.15532516 | 4.932213638 | 1.33E-06 | 1.39E-04 |

|           |              |             |             |             |          |          |
|-----------|--------------|-------------|-------------|-------------|----------|----------|
| ZNF564    | 7.826878536  | 0.429541234 | 8.374484903 | 5.531895518 | 6.79E-08 | 1.70E-05 |
| CHAC1     | -0.676987916 | 0.429818182 | 7.573594805 | 3.438934893 | 6.65E-04 | 9.85E-03 |
| KCNE2     | 1.808986261  | 0.430424675 | 3.94336039  | 4.147357753 | 4.36E-05 | 1.50E-03 |
| PLIN2     | 0.172138969  | 0.430515909 | 10.06545731 | 3.694796994 | 2.60E-04 | 5.19E-03 |
| GPR89B    | -2.448765481 | 0.430662662 | 6.452195617 | 2.837643385 | 4.85E-03 | 3.87E-02 |
| ATG4D     | 6.165216241  | 0.431006169 | 9.114681006 | 5.181233335 | 4.00E-07 | 6.04E-05 |
| NDUFA3    | 3.291639297  | 0.43133539  | 10.30179821 | 4.5222075   | 8.75E-06 | 5.10E-04 |
| TRAPPC5   | 6.437686805  | 0.432358442 | 10.30679481 | 5.240057437 | 2.99E-07 | 4.87E-05 |
| KIF2C     | 1.531591703  | 0.432505195 | 9.545242208 | 4.073852796 | 5.89E-05 | 1.79E-03 |
| MANF      | 14.63275605  | 0.433673377 | 10.38866591 | 6.815534357 | 4.97E-11 | 4.25E-08 |
| CDCA8     | 1.682085498  | 0.435260714 | 9.438992695 | 4.113876556 | 5.00E-05 | 1.61E-03 |
| HLA-F     | -2.080086037 | 0.436974675 | 9.352890584 | 2.972157575 | 3.19E-03 | 2.92E-02 |
| CDKN3     | 0.849219178  | 0.437122078 | 8.022665584 | 3.887761558 | 1.24E-04 | 3.06E-03 |
| CNFN      | -2.744886852 | 0.438965584 | 6.784707468 | 2.725063238 | 6.80E-03 | 4.88E-02 |
| H2BFWT    | -1.849711785 | 0.440237013 | 0.905951623 | 3.053369984 | 2.46E-03 | 2.43E-02 |
| HLA-A     | 1.129522085  | 0.440432143 | 13.3840414  | 3.965153337 | 9.13E-05 | 2.45E-03 |
| PIR       | -0.562081115 | 0.44073539  | 7.306070292 | 3.474570906 | 5.85E-04 | 9.05E-03 |
| TMED1     | 11.25031141  | 0.441669805 | 9.180564123 | 6.203243044 | 1.78E-09 | 8.99E-07 |
| DSCR9     | 0.448807161  | 0.442038961 | 3.210622727 | 3.774727902 | 1.92E-04 | 4.17E-03 |
| C7orf13   | -0.017654131 | 0.442347078 | 8.073299513 | 3.63904074  | 3.21E-04 | 6.04E-03 |
| HJURP     | 2.944527256  | 0.442597727 | 8.9950625   | 4.436950239 | 1.27E-05 | 6.47E-04 |
| ITPKA     | -2.332920736 | 0.443726299 | 3.912785877 | 2.880549256 | 4.25E-03 | 3.55E-02 |
| C19orf62  | 11.24514144  | 0.445446429 | 11.00722451 | 6.202272493 | 1.79E-09 | 8.99E-07 |
| MRPL4     | 6.677964171  | 0.445681169 | 11.2645724  | 5.291480073 | 2.31E-07 | 4.20E-05 |
| EIF5A2    | -0.218125624 | 0.446355519 | 6.891606331 | 3.579286102 | 4.00E-04 | 6.97E-03 |
| TECR      | 6.979009946  | 0.44737013  | 11.61775    | 5.355330774 | 1.68E-07 | 3.45E-05 |
| ECSIT     | 5.817425893  | 0.44753961  | 9.848886039 | 5.10532912  | 5.80E-07 | 7.80E-05 |
| MX2       | -1.408820312 | 0.448357143 | 10.22828052 | 3.203399734 | 1.50E-03 | 1.74E-02 |
| UQCRQ     | 4.041027737  | 0.448836688 | 11.00360666 | 4.701672543 | 3.90E-06 | 2.93E-04 |
| ZNF492    | -1.440014087 | 0.449249675 | 5.175459253 | 3.193001831 | 1.55E-03 | 1.77E-02 |
| KIAA0101  | 1.466383255  | 0.449375    | 8.714153084 | 4.056401135 | 6.32E-05 | 1.88E-03 |
| FDX1L     | 7.685319945  | 0.449488312 | 8.390725974 | 5.502738716 | 7.89E-08 | 1.91E-05 |
| AGMAT     | -0.246434881 | 0.449856169 | 5.887356006 | 3.570774152 | 4.13E-04 | 7.11E-03 |
| CRB3      | 1.170946693  | 0.450606818 | 8.619295617 | 3.976475584 | 8.73E-05 | 2.38E-03 |
| FAM54A    | 2.284726877  | 0.450668506 | 6.546088799 | 4.270794802 | 2.60E-05 | 1.07E-03 |
| C18orf56  | -1.579182943 | 0.451790584 | 4.674746591 | 3.146221572 | 1.82E-03 | 1.96E-02 |
| PIN1      | 11.43877031  | 0.45225974  | 10.09198961 | 6.238542955 | 1.46E-09 | 7.69E-07 |
| ZNF440    | 1.999930211  | 0.454286039 | 8.53657289  | 4.197287547 | 3.54E-05 | 1.29E-03 |
| B3GNT4    | -1.908719072 | 0.454512013 | 4.125957305 | 3.032763397 | 2.63E-03 | 2.55E-02 |
| LOC643719 | -2.072554838 | 0.454663312 | 4.375205032 | 2.974845477 | 3.16E-03 | 2.90E-02 |
| SSR4      | 3.320717676  | 0.457038636 | 11.67015698 | 4.529286098 | 8.48E-06 | 4.99E-04 |
| RAX       | -2.673095752 | 0.458095455 | 1.132928247 | 2.752758325 | 6.26E-03 | 4.62E-02 |
| PACSIN1   | -1.94189807  | 0.45918539  | 7.752964123 | 3.021118594 | 2.73E-03 | 2.61E-02 |
| ATP5J2    | 6.012862783  | 0.459582143 | 11.94466899 | 5.148097768 | 4.71E-07 | 6.71E-05 |
| MRPS15    | 7.363240893  | 0.46        | 10.67885974 | 5.435926214 | 1.11E-07 | 2.51E-05 |

|           |              |             |             |             |          |          |
|-----------|--------------|-------------|-------------|-------------|----------|----------|
| PDCD5     | 11.81042361  | 0.460376299 | 9.819248539 | 6.307712259 | 9.86E-10 | 5.62E-07 |
| ELOF1     | 15.89525314  | 0.462327922 | 10.17263019 | 7.033879262 | 1.31E-11 | 1.49E-08 |
| CCNB1     | 5.100783014  | 0.463906818 | 10.3011164  | 4.945853559 | 1.25E-06 | 1.34E-04 |
| GNGT1     | -2.655769545 | 0.46569513  | 2.883931331 | 2.759402727 | 6.14E-03 | 4.56E-02 |
| LOC728875 | -1.108386776 | 0.46915974  | 6.200829221 | 3.301979896 | 1.07E-03 | 1.36E-02 |
| CD320     | 5.823668746  | 0.469319156 | 10.01320763 | 5.106699916 | 5.76E-07 | 7.80E-05 |
| HNF4A     | -1.507804187 | 0.47231461  | 0.754107955 | 3.170295429 | 1.68E-03 | 1.86E-02 |
| C1orf161  | -1.519355071 | 0.472406818 | 1.169845617 | 3.166411277 | 1.70E-03 | 1.87E-02 |
| UBE2S     | 4.208856824  | 0.472993506 | 9.521307143 | 4.741058575 | 3.26E-06 | 2.58E-04 |
| ABHD8     | 8.022443977  | 0.473717208 | 9.608085877 | 5.571972041 | 5.51E-08 | 1.57E-05 |
| DMRTA2    | -2.428509462 | 0.473927922 | 1.47426461  | 2.845189862 | 4.74E-03 | 3.81E-02 |
| PDIA4     | 15.00308789  | 0.47539513  | 12.87190731 | 6.88009915  | 3.36E-11 | 3.14E-08 |
| RFXANK    | 9.870705837  | 0.47564026  | 10.85744156 | 5.939921624 | 7.72E-09 | 3.05E-06 |
| MESP1     | -2.175032919 | 0.477024026 | 6.397366558 | 2.938072101 | 3.55E-03 | 3.14E-02 |
| IFI30     | 0.576018076  | 0.477628571 | 11.5062     | 3.810967803 | 1.67E-04 | 3.80E-03 |
| ART5      | -1.614697242 | 0.478100325 | 4.050844318 | 3.134179283 | 1.89E-03 | 2.01E-02 |
| APOBEC3A  | -2.514443642 | 0.478481494 | 4.296312825 | 2.813042808 | 5.22E-03 | 4.08E-02 |
| LYPD3     | -2.660680158 | 0.479551948 | 6.93252987  | 2.757521108 | 6.17E-03 | 4.57E-02 |
| LSM4      | 12.3705547   | 0.48096526  | 11.65633198 | 6.41088242  | 5.45E-10 | 3.19E-07 |
| DHPS      | 12.74971973  | 0.481131169 | 10.08478766 | 6.480013628 | 3.64E-10 | 2.27E-07 |
| BCL2L14   | -1.91702936  | 0.481944156 | 5.282285065 | 3.029850692 | 2.65E-03 | 2.57E-02 |
| FAM83D    | 3.995914712  | 0.483042532 | 9.459851136 | 4.69103695  | 4.10E-06 | 3.04E-04 |
| MGC72080  | 3.7914594    | 0.483921753 | 7.94944789  | 4.642572625 | 5.11E-06 | 3.53E-04 |
| ROMO1     | 7.999203327  | 0.483938636 | 10.47331607 | 5.567221668 | 5.65E-08 | 1.57E-05 |
| PPIC      | 2.691031109  | 0.484099675 | 8.924509578 | 4.37377001  | 1.67E-05 | 7.92E-04 |
| TSPAN13   | 1.447904952  | 0.484244805 | 9.28664513  | 4.051443583 | 6.45E-05 | 1.91E-03 |
| HAUS8     | 9.232486854  | 0.485503247 | 7.850898377 | 5.814966585 | 1.52E-08 | 5.29E-06 |
| RGS9BP    | -1.782777646 | 0.485643831 | 3.552232955 | 3.076587832 | 2.28E-03 | 2.31E-02 |
| SERPINI1  | -0.663347441 | 0.48801461  | 6.242948214 | 3.443183008 | 6.55E-04 | 9.73E-03 |
| TUBB8     | -1.736298962 | 0.488157792 | 2.752178896 | 3.092613924 | 2.17E-03 | 2.21E-02 |
| UBE2T     | 5.810047231  | 0.488573377 | 9.040693831 | 5.103708527 | 5.85E-07 | 7.80E-05 |
| CABYR     | 0.840257298  | 0.489186039 | 6.710911851 | 3.88526426  | 1.25E-04 | 3.08E-03 |
| PRR16     | -2.370368885 | 0.489362338 | 4.466524675 | 2.866745916 | 4.43E-03 | 3.64E-02 |
| CSRP2     | -0.400751701 | 0.489741558 | 7.957701299 | 3.524042967 | 4.90E-04 | 7.99E-03 |
| C19orf39  | 11.68481592  | 0.491062338 | 6.714214935 | 6.284400215 | 1.13E-09 | 6.25E-07 |
| HLA-C     | 0.554630469  | 0.492685714 | 13.88931883 | 3.804896796 | 1.71E-04 | 3.85E-03 |
| SKA1      | 2.931728796  | 0.495170455 | 7.364597565 | 4.433779334 | 1.29E-05 | 6.54E-04 |
| FABP3     | -1.839329242 | 0.495647403 | 7.519108117 | 3.056982286 | 2.43E-03 | 2.42E-02 |
| PPP1R14A  | -2.174804681 | 0.497422078 | 7.816816883 | 2.938154484 | 3.55E-03 | 3.14E-02 |
| APOL4     | -2.508711979 | 0.497966883 | 7.925493182 | 2.815197787 | 5.19E-03 | 4.07E-02 |
| CSTA      | -1.747251465 | 0.498387013 | 5.76865844  | 3.088844468 | 2.19E-03 | 2.24E-02 |
| NDUFS5    | 9.294327159  | 0.500647403 | 11.24444383 | 5.827166805 | 1.42E-08 | 5.13E-06 |
| MPV17L2   | 15.01379592  | 0.502402597 | 8.687235065 | 6.88195949  | 3.32E-11 | 3.14E-08 |
| SELM      | -2.155229498 | 0.502984091 | 9.58327776  | 2.945212131 | 3.47E-03 | 3.09E-02 |
| TMEM37    | 0.38365189   | 0.503908766 | 6.879339448 | 3.756043563 | 2.06E-04 | 4.40E-03 |

|           |              |             |             |             |          |          |
|-----------|--------------|-------------|-------------|-------------|----------|----------|
| POP4      | 5.307093142  | 0.50405     | 9.882191234 | 4.992204133 | 1.00E-06 | 1.15E-04 |
| LASS4     | 1.683814373  | 0.509106169 | 9.379099838 | 4.11433433  | 4.99E-05 | 1.61E-03 |
| COPE      | 22.41665312  | 0.509307468 | 12.17471477 | 8.094987249 | 1.35E-14 | 3.47E-11 |
| PTTG1     | 3.907054998  | 0.51010974  | 9.63688539  | 4.670026865 | 4.51E-06 | 3.24E-04 |
| AKR1B1    | 5.811060173  | 0.511471104 | 10.42732841 | 5.103931027 | 5.84E-07 | 7.80E-05 |
| NHLRC1    | 2.41612901   | 0.51383539  | 7.394368344 | 4.304335394 | 2.25E-05 | 9.47E-04 |
| HES6      | 0.374929724  | 0.51533474  | 7.878930357 | 3.753535924 | 2.08E-04 | 4.42E-03 |
| FBXW9     | 8.041857373  | 0.516253247 | 8.850909091 | 5.575937613 | 5.40E-08 | 1.57E-05 |
| LRRC31    | -1.33207895  | 0.517308766 | 0.753762825 | 3.228847115 | 1.38E-03 | 1.63E-02 |
| LOC113230 | -0.90044019  | 0.517893831 | 8.366606006 | 3.368640021 | 8.52E-04 | 1.17E-02 |
| YIPF2     | 17.41870963  | 0.521385714 | 11.04534416 | 7.291106173 | 2.62E-12 | 3.85E-09 |
| CENPA     | 3.383272532  | 0.522767857 | 8.056237175 | 4.544481393 | 7.93E-06 | 4.77E-04 |
| RAD23A    | 21.79267519  | 0.523311688 | 12.12474481 | 7.997551784 | 2.61E-14 | 5.95E-11 |
| PSMB9     | -1.130652761 | 0.523835714 | 9.714023052 | 3.29476807  | 1.10E-03 | 1.38E-02 |
| DEPDC1B   | 3.058326738  | 0.523866558 | 7.675023539 | 4.465058145 | 1.13E-05 | 6.03E-04 |
| ASCL2     | -1.782520047 | 0.52388539  | 6.410484903 | 3.07667687  | 2.28E-03 | 2.31E-02 |
| BGLAP     | 6.270308344  | 0.527061688 | 6.188759416 | 5.203987359 | 3.57E-07 | 5.60E-05 |
| BATF2     | -0.093404467 | 0.52896461  | 7.372465422 | 3.616568083 | 3.49E-04 | 6.34E-03 |
| TMEM205   | 9.905279645  | 0.529209091 | 10.99255714 | 5.946631482 | 7.44E-09 | 2.99E-06 |
| TNFSF11   | -2.600922403 | 0.529944156 | 2.325035065 | 2.780336514 | 5.77E-03 | 4.35E-02 |
| STX10     | 12.97768232  | 0.530494481 | 8.484569318 | 6.521311386 | 2.86E-10 | 1.96E-07 |
| ZNF98     | -2.354320619 | 0.530542208 | 4.489752273 | 2.872668968 | 4.35E-03 | 3.61E-02 |
| TCL1B     | -0.509866741 | 0.530917857 | 0.995114773 | 3.49065323  | 5.52E-04 | 8.72E-03 |
| BIRC5     | 3.657415707  | 0.53119026  | 9.304375649 | 4.610560149 | 5.90E-06 | 3.89E-04 |
| NDUFA13   | 12.92088697  | 0.531728247 | 11.72022516 | 6.511040681 | 3.04E-10 | 2.00E-07 |
| TMEM38A   | 3.558340741  | 0.531894481 | 7.526506981 | 4.586774707 | 6.56E-06 | 4.17E-04 |
| FZD9      | 0.276085882  | 0.532561364 | 4.146103409 | 3.725010887 | 2.32E-04 | 4.77E-03 |
| C6orf129  | 9.327449136  | 0.533264935 | 9.078653247 | 5.833692973 | 1.37E-08 | 5.13E-06 |
| CDKN2BAS  | -2.648320902 | 0.534557143 | 4.088437662 | 2.762254529 | 6.09E-03 | 4.53E-02 |
| WFDC2     | -0.679790494 | 0.536044805 | 14.17204383 | 3.438061473 | 6.67E-04 | 9.86E-03 |
| NDUFA7    | 8.990516721  | 0.53667013  | 10.10084286 | 5.767032272 | 1.97E-08 | 6.73E-06 |
| ACPP      | -2.703968602 | 0.537234091 | 7.428315097 | 2.74088101  | 6.49E-03 | 4.73E-02 |
| RPL39L    | 5.144485134  | 0.537947403 | 9.016589286 | 4.955702491 | 1.19E-06 | 1.29E-04 |
| UQRFS1    | 10.65040252  | 0.538306169 | 11.62200308 | 6.089828425 | 3.37E-09 | 1.54E-06 |
| TTC39A    | -1.079710645 | 0.539215584 | 8.154627273 | 3.311246428 | 1.04E-03 | 1.33E-02 |
| IGFBP2    | 1.646984892  | 0.541741558 | 13.82191234 | 4.104572726 | 5.20E-05 | 1.65E-03 |
| KLHL35    | 0.038736228  | 0.544227273 | 7.074561688 | 3.655687849 | 3.02E-04 | 5.74E-03 |
| DEFB4A    | -1.099609372 | 0.544888636 | 1.000200812 | 3.304818829 | 1.06E-03 | 1.35E-02 |
| ACP5      | 2.249362265  | 0.547169805 | 9.436619318 | 4.261728117 | 2.70E-05 | 1.09E-03 |
| SECTM1    | -2.186130562 | 0.548946753 | 9.130627922 | 2.934063731 | 3.60E-03 | 3.17E-02 |
| NANOS3    | 3.162964961  | 0.551824026 | 3.565931494 | 4.490767491 | 1.01E-05 | 5.55E-04 |
| MAST1     | -0.119388251 | 0.55325487  | 7.274871591 | 3.608830046 | 3.59E-04 | 6.46E-03 |
| CXorf59   | -1.973369321 | 0.554032468 | 1.826971429 | 3.010034017 | 2.83E-03 | 2.67E-02 |
| ABCC6P2   | -0.093797898 | 0.554051623 | 3.842708929 | 3.616451031 | 3.49E-04 | 6.34E-03 |
| CRIL      | -1.44889212  | 0.557353896 | 2.265945779 | 3.19003671  | 1.57E-03 | 1.78E-02 |

|           |              |             |             |             |          |          |
|-----------|--------------|-------------|-------------|-------------|----------|----------|
| FARSA     | 23.31574663  | 0.559760065 | 10.85915795 | 8.234091148 | 5.25E-15 | 1.54E-11 |
| MRPL34    | 16.08890132  | 0.561095779 | 10.31525244 | 7.066940964 | 1.07E-11 | 1.29E-08 |
| HOXC5     | -2.018244051 | 0.561134416 | 6.266778247 | 2.994161812 | 2.98E-03 | 2.77E-02 |
| IFI6      | -1.944491885 | 0.562704221 | 13.31088847 | 3.020206466 | 2.74E-03 | 2.62E-02 |
| SLPI      | -2.249687075 | 0.564083117 | 13.37911299 | 2.911007366 | 3.87E-03 | 3.33E-02 |
| KLF1      | 6.989735719  | 0.565362013 | 2.43902711  | 5.35759409  | 1.66E-07 | 3.45E-05 |
| CENPW     | 0.389976047  | 0.57014513  | 8.176019968 | 3.757860817 | 2.05E-04 | 4.38E-03 |
| CDC25C    | 6.063346313  | 0.57096526  | 7.371718994 | 5.159097177 | 4.46E-07 | 6.49E-05 |
| BHLHA15   | 1.350415118  | 0.57279513  | 4.241024838 | 4.025197526 | 7.18E-05 | 2.07E-03 |
| PLEKHF1   | 2.201532922  | 0.572817857 | 9.088114773 | 4.249438546 | 2.85E-05 | 1.13E-03 |
| GDF5      | -1.907422229 | 0.575735065 | 4.198956494 | 3.033217696 | 2.63E-03 | 2.55E-02 |
| WDR83     | 16.77554942  | 0.576896104 | 7.569413636 | 7.183301871 | 5.17E-12 | 6.64E-09 |
| CDC20     | 6.723380308  | 0.577508442 | 10.51501136 | 5.301153311 | 2.20E-07 | 4.11E-05 |
| MICB      | 0.048061707  | 0.581240584 | 7.381855357 | 3.65843417  | 2.99E-04 | 5.72E-03 |
| FOLR1     | -1.94901322  | 0.58194513  | 11.84553231 | 3.018615896 | 2.75E-03 | 2.63E-02 |
| ISG15     | -0.991621197 | 0.588827922 | 11.11131721 | 3.339562671 | 9.43E-04 | 1.25E-02 |
| DAND5     | -1.395405048 | 0.590771753 | 2.732398214 | 3.207861805 | 1.48E-03 | 1.72E-02 |
| CLCN1     | 1.744606725  | 0.592026948 | 1.552811526 | 4.130402233 | 4.67E-05 | 1.56E-03 |
| CRIP3     | -0.984420656 | 0.592358442 | 3.307746104 | 3.34186743  | 9.35E-04 | 1.24E-02 |
| SYT13     | -2.58529962  | 0.592361688 | 7.83704513  | 2.786272011 | 5.66E-03 | 4.31E-02 |
| UBE2C     | 6.679045899  | 0.592644156 | 10.62352792 | 5.291710641 | 2.31E-07 | 4.20E-05 |
| GDF3      | -1.78928671  | 0.592938961 | 2.230908442 | 3.074337218 | 2.30E-03 | 2.32E-02 |
| UBB       | -0.953092498 | 0.593315909 | 12.83839302 | 3.351877883 | 9.03E-04 | 1.21E-02 |
| ACOT4     | 5.723069055  | 0.594258442 | 6.608188312 | 5.084572679 | 6.42E-07 | 8.24E-05 |
| C12orf56  | -1.132833448 | 0.595650974 | 5.319330682 | 3.294060969 | 1.10E-03 | 1.39E-02 |
| BST2      | -0.141740327 | 0.595842532 | 12.55009399 | 3.602161362 | 3.68E-04 | 6.60E-03 |
| MYBL2     | 2.952244336  | 0.596323052 | 10.73155633 | 4.43886124  | 1.26E-05 | 6.45E-04 |
| C19orf43  | 27.71638807  | 0.596979545 | 11.96962419 | 8.895359792 | 5.11E-17 | 2.10E-13 |
| C19orf56  | 21.21948026  | 0.597462987 | 11.37064058 | 7.907370252 | 4.77E-14 | 9.80E-11 |
| XG        | -2.407912866 | 0.598321104 | 4.323027435 | 2.852843838 | 4.63E-03 | 3.75E-02 |
| LDHC      | -2.703778139 | 0.60065974  | 3.398741558 | 2.740954434 | 6.48E-03 | 4.73E-02 |
| GCDH      | 18.74282345  | 0.604848052 | 9.150570779 | 7.509657612 | 6.49E-13 | 1.03E-09 |
| AKR1B15   | -1.505530727 | 0.60554026  | 1.339538961 | 3.17105939  | 1.67E-03 | 1.85E-02 |
| ALPL      | -1.287396751 | 0.610023377 | 10.67611429 | 3.243577937 | 1.31E-03 | 1.57E-02 |
| GZMB      | -2.746570924 | 0.612724675 | 5.128292208 | 2.724410355 | 6.81E-03 | 4.89E-02 |
| LOC284749 | -2.529448269 | 0.613765584 | 3.584192532 | 2.807393971 | 5.31E-03 | 4.14E-02 |
| TRY6      | -2.002291268 | 0.615069481 | 2.382570455 | 2.99981337  | 2.92E-03 | 2.74E-02 |
| NPTX2     | -2.229852765 | 0.616026299 | 7.831000812 | 2.918221109 | 3.78E-03 | 3.27E-02 |
| NMU       | -1.236886766 | 0.622815584 | 7.316382468 | 3.260155379 | 1.24E-03 | 1.50E-02 |
| GGH       | 6.661680596  | 0.623943506 | 9.225953571 | 5.288008252 | 2.35E-07 | 4.24E-05 |
| UBL5      | 16.7917247   | 0.62564513  | 10.9900914  | 7.186026948 | 5.08E-12 | 6.64E-09 |
| C15orf48  | -0.650226002 | 0.626797078 | 7.19236737  | 3.447264917 | 6.45E-04 | 9.64E-03 |
| CSAG2     | -2.263235055 | 0.628661039 | 1.721898701 | 2.906070243 | 3.93E-03 | 3.36E-02 |
| C19orf53  | 19.64616254  | 0.63067013  | 11.52668766 | 7.656308084 | 2.50E-13 | 4.28E-10 |
| CCL8      | -1.078437442 | 0.631200649 | 6.094580844 | 3.311657298 | 1.04E-03 | 1.33E-02 |

|            |              |             |             |             |          |          |
|------------|--------------|-------------|-------------|-------------|----------|----------|
| C19orf57   | 6.019621454  | 0.631237662 | 7.130120779 | 5.149571493 | 4.67E-07 | 6.71E-05 |
| CCL7       | -1.695962755 | 0.63399026  | 3.342499026 | 3.106459213 | 2.07E-03 | 2.14E-02 |
| NAP1L6     | -2.667275286 | 0.636168831 | 2.064347403 | 2.754992105 | 6.22E-03 | 4.60E-02 |
| HSPC072    | -0.241136757 | 0.636839935 | 2.421916071 | 3.572368593 | 4.11E-04 | 7.07E-03 |
| LAMP3      | 0.0540478    | 0.638553896 | 8.704141883 | 3.660196061 | 2.97E-04 | 5.69E-03 |
| DDX39      | 15.69507911  | 0.640182468 | 10.79575097 | 6.99958668  | 1.62E-11 | 1.66E-08 |
| NDUFB7     | 13.58689128  | 0.64250487  | 11.38486542 | 6.63073094  | 1.50E-10 | 1.14E-07 |
| HLA-G      | -2.309468191 | 0.645769805 | 4.189704383 | 2.889162069 | 4.14E-03 | 3.49E-02 |
| DEFB126    | -1.013813726 | 0.645921429 | 1.597021104 | 3.332449953 | 9.66E-04 | 1.27E-02 |
| NRG4       | -2.016319651 | 0.647414286 | 4.336426623 | 2.994844097 | 2.97E-03 | 2.77E-02 |
| CXCL10     | -2.308827813 | 0.649369805 | 9.578942695 | 2.889396904 | 4.13E-03 | 3.49E-02 |
| MGC87042   | 1.673450176  | 0.654018831 | 3.69398474  | 4.111589404 | 5.05E-05 | 1.61E-03 |
| DNASE2     | 37.74349466  | 0.654828896 | 10.80995016 | 10.30962714 | 1.34E-21 | 1.38E-17 |
| IFI27      | -1.076653684 | 0.655732468 | 12.66453831 | 3.312232848 | 1.04E-03 | 1.33E-02 |
| HOXA6      | -1.757707007 | 0.656737662 | 2.078379221 | 3.085242018 | 2.22E-03 | 2.25E-02 |
| ASNA1      | 30.72239016  | 0.656747078 | 11.36537679 | 9.33108223  | 2.16E-18 | 1.48E-14 |
| C1orf182   | 4.637667396  | 0.667563312 | 3.988983604 | 4.840440385 | 2.06E-06 | 1.87E-04 |
| ASF1B      | 10.54767092  | 0.668006494 | 10.04400844 | 6.070242409 | 3.76E-09 | 1.68E-06 |
| MAT1A      | -1.519945781 | 0.670322727 | 6.122627597 | 3.166212523 | 1.70E-03 | 1.87E-02 |
| ADAM21     | 1.200335043  | 0.673217857 | 3.243056981 | 3.984490521 | 8.45E-05 | 2.32E-03 |
| IGFBPL1    | -1.576152186 | 0.676637013 | 3.049662013 | 3.147247253 | 1.81E-03 | 1.95E-02 |
| GADD45GIP1 | 25.6310532   | 0.679421104 | 10.47543133 | 8.585806975 | 4.59E-16 | 1.57E-12 |
| ECE2       | 14.72555073  | 0.681200974 | 8.997945942 | 6.831754016 | 4.51E-11 | 4.02E-08 |
| DSCR6      | -1.038898527 | 0.682728896 | 4.102309253 | 3.324393264 | 9.93E-04 | 1.29E-02 |
| LOC389458  | -0.173451127 | 0.683774675 | 2.510754221 | 3.592681073 | 3.81E-04 | 6.73E-03 |
| SLC22A16   | -0.310804571 | 0.687222727 | 2.154188636 | 3.551349989 | 4.43E-04 | 7.49E-03 |
| MESP2      | 2.095059743  | 0.687682143 | 4.468517045 | 4.221967001 | 3.19E-05 | 1.22E-03 |
| LOC440356  | -1.286268263 | 0.690272078 | 3.009306818 | 3.243949169 | 1.31E-03 | 1.56E-02 |
| GATA2      | -0.861285607 | 0.690694156 | 6.004501623 | 3.381055162 | 8.15E-04 | 1.13E-02 |
| PRDX2      | 21.0560502   | 0.692630519 | 12.56800162 | 7.881535552 | 5.67E-14 | 1.06E-10 |
| GIPC2      | -1.367523063 | 0.700969805 | 3.852358929 | 3.217117202 | 1.43E-03 | 1.68E-02 |
| CNTD2      | -0.999743386 | 0.70116039  | 4.819043831 | 3.336961136 | 9.51E-04 | 1.26E-02 |
| RTBDN      | -0.681793149 | 0.701354221 | 2.072351136 | 3.437437223 | 6.68E-04 | 9.88E-03 |
| LYG2       | -0.11614529  | 0.704326299 | 2.717191071 | 3.609796638 | 3.58E-04 | 6.45E-03 |
| INA        | -2.654412196 | 0.706678896 | 5.926906981 | 2.759922613 | 6.13E-03 | 4.56E-02 |
| LRRIQ4     | 5.676847054  | 0.714155519 | 1.999553084 | 5.074378866 | 6.74E-07 | 8.39E-05 |
| CCNE1      | 3.524419994  | 0.717277273 | 9.355839935 | 4.578606568 | 6.81E-06 | 4.30E-04 |
| CACNA1A    | 4.374186547  | 0.718651299 | 7.771184091 | 4.779585199 | 2.73E-06 | 2.26E-04 |
| FOLR3      | -2.714461522 | 0.719544156 | 4.789448052 | 2.736833049 | 6.56E-03 | 4.77E-02 |
| ZDHHC19    | 0.174196456  | 0.727983766 | 2.790350974 | 3.69539722  | 2.60E-04 | 5.19E-03 |
| GAL        | -1.962116942 | 0.734252597 | 4.514037987 | 3.014001653 | 2.79E-03 | 2.65E-02 |
| SLC30A2    | -2.232478015 | 0.740151948 | 5.529958442 | 2.917267272 | 3.79E-03 | 3.28E-02 |
| KAZALD1    | 0.57544276   | 0.742421104 | 6.926717695 | 3.81080461  | 1.67E-04 | 3.80E-03 |
| SPC24      | 12.8970014   | 0.748647727 | 6.766198539 | 6.506717661 | 3.12E-10 | 2.00E-07 |
| HOXA9      | -2.707886191 | 0.748681494 | 3.539316071 | 2.739370347 | 6.52E-03 | 4.75E-02 |

|           |              |             |             |             |          |          |
|-----------|--------------|-------------|-------------|-------------|----------|----------|
| KCNK9     | -1.981974143 | 0.749234091 | 4.458435227 | 3.006996599 | 2.86E-03 | 2.69E-02 |
| GPR160    | 4.495237176  | 0.74929026  | 8.540239286 | 4.807625593 | 2.39E-06 | 2.07E-04 |
| LOC389493 | -1.412044678 | 0.750080844 | 5.904368344 | 3.202326407 | 1.51E-03 | 1.74E-02 |
| PRSS3     | 1.423847756  | 0.751286039 | 3.338601461 | 4.044981119 | 6.62E-05 | 1.95E-03 |
| APOA1     | -2.328614651 | 0.755342532 | 9.706210227 | 2.882132465 | 4.23E-03 | 3.54E-02 |
| KBTBD12   | -2.032992589 | 0.759767532 | 5.025886364 | 2.988927931 | 3.03E-03 | 2.80E-02 |
| GSC       | -1.606438401 | 0.760629221 | 3.839603571 | 3.136983574 | 1.87E-03 | 2.00E-02 |
| USH1C     | -1.520652382 | 0.762914935 | 2.425587987 | 3.16597476  | 1.70E-03 | 1.87E-02 |
| HOXB13    | -2.768613667 | 0.774524351 | 1.69616737  | 2.715851033 | 6.98E-03 | 4.98E-02 |
| CXCL5     | -2.02963001  | 0.780817532 | 4.730942532 | 2.990121984 | 3.01E-03 | 2.79E-02 |
| CHRD12    | 2.441305177  | 0.783311039 | 2.103374351 | 4.31073534  | 2.19E-05 | 9.33E-04 |
| ORM1      | -1.222353341 | 0.783855844 | 1.681385065 | 3.264910747 | 1.22E-03 | 1.49E-02 |
| HOXA7     | -1.885117017 | 0.797509416 | 4.952080682 | 3.041021474 | 2.56E-03 | 2.50E-02 |
| GDF15     | 4.099710167  | 0.797932792 | 7.654304708 | 4.715476266 | 3.66E-06 | 2.79E-04 |
| RNASEH2A  | 27.74844854  | 0.798781494 | 9.676129708 | 8.900069831 | 4.94E-17 | 2.10E-13 |
| KRT13     | -2.327370154 | 0.804172403 | 3.132964773 | 2.882589873 | 4.22E-03 | 3.54E-02 |
| CALR      | 129.7043158  | 0.805101623 | 14.6246112  | 21.74628034 | 4.00E-64 | 8.21E-60 |
| SYCE2     | 11.49396613  | 0.806792532 | 5.497109903 | 6.248852599 | 1.38E-09 | 7.45E-07 |
| GFRA3     | 0.733626788  | 0.816652597 | 4.250421753 | 3.855438747 | 1.41E-04 | 3.34E-03 |
| ELOVL3    | 2.510950145  | 0.824350649 | 4.679903896 | 4.328396062 | 2.03E-05 | 8.95E-04 |
| HOXA10    | -2.294774846 | 0.849777597 | 4.472009578 | 2.894545771 | 4.07E-03 | 3.45E-02 |
| IGF2BP3   | -2.138563501 | 0.853415909 | 7.332346916 | 2.951208351 | 3.41E-03 | 3.06E-02 |
| HTR3A     | -2.561147457 | 0.880128896 | 7.752794968 | 2.795424497 | 5.51E-03 | 4.24E-02 |
| CDKN2A    | -0.185669758 | 0.889781818 | 10.71338701 | 3.589022056 | 3.86E-04 | 6.79E-03 |
| ALG1L     | 1.715511502  | 0.899904221 | 4.856031981 | 4.1227191   | 4.82E-05 | 1.59E-03 |
| PCDHB5    | -0.547328311 | 0.900390584 | 7.129642045 | 3.479121797 | 5.76E-04 | 8.95E-03 |
| XAGE2     | -2.439821957 | 0.905222727 | 3.059097727 | 2.840977679 | 4.80E-03 | 3.85E-02 |
| SLC15A1   | 2.695944346  | 0.928787013 | 4.097357143 | 4.375002167 | 1.67E-05 | 7.90E-04 |
| FXYD4     | 0.325815594  | 0.944040909 | 2.536476299 | 3.739386979 | 2.20E-04 | 4.59E-03 |
| LGALS7    | 3.937963385  | 0.971962662 | 3.291486526 | 4.677344106 | 4.36E-06 | 3.20E-04 |
| MS4A15    | 1.098389491  | 0.97633961  | 4.248193182 | 3.956624951 | 9.45E-05 | 2.52E-03 |
| C3orf55   | 1.751696434  | 1.010922403 | 4.048933279 | 4.132272473 | 4.64E-05 | 1.56E-03 |
| PRSS1     | 2.168704444  | 1.012262987 | 6.143309416 | 4.240985155 | 2.95E-05 | 1.15E-03 |
| GTSF1     | -1.710933826 | 1.012951623 | 3.666719968 | 3.101327196 | 2.11E-03 | 2.17E-02 |
| CT45A5    | -2.599331029 | 1.013278571 | 2.572936039 | 2.780941668 | 5.75E-03 | 4.35E-02 |
| PHOX2A    | -1.853566556 | 1.022118831 | 6.162759416 | 3.052027807 | 2.47E-03 | 2.44E-02 |
| PDCL2     | 2.267098314  | 1.03699513  | 1.832971591 | 4.266277368 | 2.65E-05 | 1.08E-03 |
| PPP1R1C   | 2.461154336  | 1.03875974  | 3.438998701 | 4.315775224 | 2.15E-05 | 9.20E-04 |
| MAGEA11   | -2.568694503 | 1.070240584 | 2.813913799 | 2.792567594 | 5.56E-03 | 4.27E-02 |
| PLAC1     | 1.857486479  | 1.072007468 | 2.995390747 | 4.160090515 | 4.13E-05 | 1.45E-03 |
| RHCG      | 3.427571468  | 1.083291883 | 3.695945942 | 4.555215444 | 7.56E-06 | 4.63E-04 |
| SST       | -2.600287426 | 1.095100325 | 8.131533279 | 2.780577992 | 5.76E-03 | 4.35E-02 |
| CT45A2    | -1.352868581 | 1.10051461  | 2.441436526 | 3.2219718   | 1.41E-03 | 1.66E-02 |
| C10orf99  | 0.767049465  | 1.109505844 | 3.629890584 | 3.864809754 | 1.36E-04 | 3.25E-03 |
| AGR2      | 0.649180187  | 1.124702597 | 5.924978571 | 3.831669382 | 1.54E-04 | 3.59E-03 |



|         |              |             |             |             |          |          |
|---------|--------------|-------------|-------------|-------------|----------|----------|
| MMP1    | 1.860875708  | 1.132491883 | 5.185156331 | 4.160978994 | 4.12E-05 | 1.45E-03 |
| ABP1    | -0.411945721 | 1.187475    | 7.294890747 | 3.520630958 | 4.96E-04 | 8.06E-03 |
| LGALS7B | 3.274492335  | 1.217231818 | 3.354543831 | 4.518028861 | 8.91E-06 | 5.14E-04 |
| CLDN22  | 0.071735286  | 1.27420974  | 1.664272403 | 3.66539751  | 2.91E-04 | 5.63E-03 |
| FABP6   | 1.079438217  | 1.343200974 | 4.322792695 | 3.951425379 | 9.64E-05 | 2.56E-03 |
| TKTL1   | -0.143720962 | 1.504493506 | 3.552188312 | 3.601569899 | 3.69E-04 | 6.61E-03 |

**Supplemental Table 7. List of genes in boxplot significantly overrepresented in *CALR<sup>Hi</sup>* versus *CALR<sup>Lo</sup>* HGSC samples from TCGA public database**

| Connection                 | Gene symbol | log <sub>2</sub> (FC) | P-value  |
|----------------------------|-------------|-----------------------|----------|
| Activated DC               | IDO1        | 1.08649026            | 1.67E-03 |
| Activated DC               | LAMP3       | 1.100985714           | 2.50E-05 |
| Antigen processing         | CD8A        | 0.523277922           | 4.78E-02 |
| Antigen processing         | TAPBP       | 0.294956494           | 2.38E-02 |
| Antigen processing         | TAP2        | 0.375432468           | 3.56E-02 |
| Antigen processing         | MR1         | 0.455369481           | 1.44E-03 |
| Antigen processing         | HLA-A       | 0.801637013           | 3.26E-06 |
| Antigen processing         | HLA-B       | 0.818880519           | 1.91E-04 |
| Antigen processing         | TAP1        | 0.85977987            | 3.15E-05 |
| Antigen processing         | HLA-C       | 0.866167532           | 1.08E-05 |
| Antigen processing         | PSMB9       | 1.069485714           | 3.60E-06 |
| B cells function           | CD38        | 0.942938312           | 2.72E-04 |
| B cells function           | CD79B       | 0.490076623           | 2.45E-02 |
| B cells function           | ADA         | 0.505817532           | 9.26E-05 |
| B cells function           | BLK         | 0.741601948           | 7.19E-03 |
| Complement                 | C2          | 0.486945455           | 3.50E-02 |
| Complement                 | C1R         | 0.521176623           | 1.14E-02 |
| Complement                 | C3          | 0.647036364           | 4.30E-02 |
| Cytotoxicity               | GZMM        | 0.468430519           | 4.78E-02 |
| Cytotoxicity               | CD8A        | 0.523277922           | 4.78E-02 |
| Cytotoxicity               | KLRF1       | 0.591595455           | 3.48E-02 |
| Cytotoxicity               | GZMH        | 0.657107792           | 1.87E-02 |
| Cytotoxicity               | KLRD1       | 0.690942857           | 3.63E-03 |
| Cytotoxicity               | GZMA        | 0.691885714           | 2.46E-02 |
| Cytotoxicity               | NKG7        | 0.773351948           | 9.70E-03 |
| Cytotoxicity               | CD8B        | 0.979196104           | 8.05E-04 |
| Cytotoxicity               | GNLY        | 1.047596753           | 3.19E-03 |
| Cytotoxicity               | GZMB        | 1.148668831           | 6.11E-04 |
| ER stress                  | ATF6        | 0.157575325           | 1.90E-02 |
| ER stress                  | XBPI        | 0.319206494           | 9.26E-03 |
| ER stress                  | DDIT3       | 0.375333766           | 7.79E-03 |
| ER stress                  | HSP90B1     | 0.42846039            | 4.10E-08 |
| ER stress                  | HSPA5       | 0.482238312           | 5.60E-08 |
| Chemokines T-cell function | IRF1        | 0.360668831           | 4.19E-02 |
| Chemokines T-cell function | CXCL9       | 0.846008442           | 3.48E-02 |
| Chemokines T-cell function | CXCL11      | 1.107820779           | 1.01E-03 |
| NK cytotoxicity            | KLRF1       | 0.591595455           | 3.48E-02 |
| NK cytotoxicity            | KLRD1       | 0.690942857           | 3.63E-03 |
| NK cytotoxicity            | GZMB        | 1.148668831           | 6.11E-04 |

|                            |         |             |          |
|----------------------------|---------|-------------|----------|
| NK cytotoxicity            | IFNB1   | 0.330520779 | 5.00E-02 |
| NK cytotoxicity            | KLRG1   | 0.391533766 | 1.92E-02 |
| NK cytotoxicity            | IL15RA  | 0.583824675 | 7.93E-03 |
| T cell activation          | CD40    | 0.575080519 | 1.29E-03 |
| T cell activation          | CCL5    | 0.593720779 | 3.61E-02 |
| T phenotype                | PDCD1   | 0.523820779 | 4.73E-02 |
| T phenotype                | BATF    | 0.546657143 | 1.91E-02 |
| T phenotype                | CXCL13  | 0.960177273 | 1.54E-02 |
| T <sub>H</sub> 1 phenotype | LTA     | 0.476931818 | 2.42E-02 |
| T <sub>H</sub> 1 phenotype | IL12RB2 | 0.658057143 | 3.51E-03 |
| T <sub>H</sub> 1 phenotype | IFNG    | 0.682583766 | 2.54E-03 |
| T <sub>H</sub> 1 phenotype | CD38    | 0.942938312 | 2.72E-04 |
